# Supplementary material for: From Anti-PD-1/PD-L1 to CTLA-4 and to MUC1—Is the Better Response to Treatment in Smokers of Cancer Patients Drug Specific?
Source: MDPI journal article supplement (doi:10.3390/jpm11090914), 2021-09-13
Supplement: s1 [file s1]

Supplementary Table S1. HR values of smokers and non-smoker treated with different drugs for meta-analysis

| First author              | Ref. No.                               | ANA LYTI C MET RIX  | first/ second Treatment | Drugs          | Year | Current/ #Patients  | Former/ #Patients   | Never/ #Patients    | Overall/ #Patients    | Disease |
|---------------------------|----------------------------------------|---------------------|-------------------------|----------------|------|---------------------|---------------------|---------------------|-----------------------|---------|
| <b>PD-1/PD-L1 (NSCLC)</b> |                                        |                     |                         |                |      |                     |                     |                     |                       |         |
| <b>Reck</b>               | (Reck, Rodriguez-Abr eu, et al., 2016) | PFS                 | First line              | Pembrol izumab | 2016 | 0·68(0·36-1·31)/65  | 0·47(0·33-0·67)/216 | 0·90(0·11-7·59)/24  | 0·50 (0·37-0·68)/305  | NSCLCs  |
| <b>Mok</b>                | (Mok et al., 2019)-1                   | OS/T PS $\geq$ 50 % | First line              | Pembrol izumab | 2019 | 0·71(0·43-1·16)/116 | 0·60(0·46-0·80)/352 | 1·10(0·69-1·75)/131 | 0·69 (0·56-0·85)/599  | NSCLC   |
| <b>Mok</b>                | (Mok et al., 2019)-2                   | OS/T PS $\geq$ 20 % | First line              | Pembrol izumab | 2019 | 0·80(0·53-1·21)/160 | 0·65(0·51-0·83)/473 | 1·26(0·84-1·89)/185 | 0·77 (0·64-0·92)/818  | NSCLC   |
| <b>Mok</b>                | (Mok et al., 2019)-3                   | OS/T PS $\geq$ 1 %  | First line              | Pembrol izumab | 2019 | 0·95(0·70-1·29)/271 | 0·71(0·59-0·86)/721 | 1·00(0·73-1·37)/282 | 0·81 (0·71-0·93)/1274 | NSCLC   |
| <b>Gandhi</b>             | (Gandhi et al., 2018)-1                | OS                  | Multi therapy           | Pembrol izumab | 2016 | 0·54(0·41-0·71)/543 | -                   | 0·23(0·10-0·54)/73  | 0·49(0·38-0·64)/616   | NSCLC   |

|                  |                           |     |               |               |      |                     |   |                      |                     |       |
|------------------|---------------------------|-----|---------------|---------------|------|---------------------|---|----------------------|---------------------|-------|
| <b>Gandhi</b>    | (Gandhi et al., 2018)-2   | PFS | Multi therapy | Pembrolizumab | 2016 | 0·54(0·43-0·66)/543 | - | 0·43(0·23-0·81)/73   | 0·52(0·43-0·64)/616 | NSCLC |
| <b>Borghaei</b>  | (Borghaei et al., 2015)   | OS  | Monotherapy   | Nivolumab     | 2015 | 0·70(0·56-0·86)/458 | - | 1·02(0·64-1·161)/118 | 0·75(0·62-0·91)/582 | NSCLC |
| <b>Wu</b>        | (Wu et al., 2019)         | OS  | Second        | Nivolumab     | 2019 | 0·73(0·6-0·98)236   |   | 0·67(0·4-1·05)/102   |                     | NSCLC |
| <b>Socinski</b>  | (Socinski et al., 2018)   | PFS | First line    | Atezolizumab  | 2018 | 0·58(0·25-0·85)/585 | - | 0·80(0·30-1·30)/108  | -                   | NSCLC |
| <b>Rittmeyer</b> | ((Rittmeyer et al., 2017) | OS  | Monotherapy   | Atezolizumab  | 2017 | 0·74(0·61-0·88)/694 | - | 0·71(0·47-1·08)/156  | -                   | NSCLC |
| <b>West</b>      | (West et al., 2019) - 1   | PFS | Multi therapy | Atezolizumab  | 2019 | 0·81(0·65-1·02)/403 | - | 0·55(0·26-1·19)/48   | 0·79(0·64-0·98)/451 | NSCLC |
| <b>West</b>      | (West et al., 201         | OS  | Multi therapy | Atezolizumab  | 2019 | 0·64(0·53-0·77)/403 | - | 0·63(0·35-1·12)/48   | 0·64(0·54-0·77)/451 | NSCLC |

|                 |                           |                 |                      |              |      |                     |                     |                     |                     |       |
|-----------------|---------------------------|-----------------|----------------------|--------------|------|---------------------|---------------------|---------------------|---------------------|-------|
|                 | 9) -<br>2                 |                 |                      |              |      |                     |                     |                     |                     |       |
| <b>Barlesi</b>  | (Barlesi et al., 2018)    | OS              | Monotherapy          | Avelumab     | 2018 | 0.83(0.66-1.04)/444 | -                   | 1.69(0.97-2.95)/84  | -                   | NSCLC |
| <b>Antonia</b>  | (Antonia et al., 2017)    | PFS             | Second or Third line | Durvalumab   | 2017 | 0.59(0.47-0.73)/649 | -                   | 0.29(0.15-0.57)/64  | -                   | NSCLC |
| <b>Antonia</b>  | (Antonia et al., 2018)    | OS              | Second or Third line | Durvalumab   | 2018 | 0.72(0.56-0.92)/649 | -                   | 0.35(0.16-0.76)/64  | -                   | NSCLC |
| <b>Carbon e</b> | (Carbon e et al., 2017)-1 | PFS             | First line           | Nivolumab    | 2017 | 1.03(0.66-1.62)/52  | 1.14(0.89-1.47)/186 | 2.51(1.31-4.83)/30  | 1.19(0.97-1.46)/271 | NSCLC |
| <b>Carbon e</b> | (Carbon e et al., 2017)-2 | OS              | First line           | Nivolumab    | 2017 | 1.05(0.63-1.74)/52  | 1.09(0.84-1.42)/186 | 1.02(0.54-1.93)/30  | 1.08(0.87-1.34)/271 | NSCLC |
| <b>Reck</b>     | (Reck et al., 2019)-1     | OS/A BCP vs BCP | multi therapy        | Atezolizumab | 2019 | 0.80(0.65-0.98)/641 | -                   | 0.66(0.41-1.05)/159 | -                   | NSCLC |
| <b>Reck</b>     | (Reck et al., 2019)       | OS/A CP vs BCP  | multi therapy        | Atezolizumab | 2019 | 0.82(0.66-1.01)/648 | -                   | 0.96(0.62-1.49)/154 | -                   |       |

|                                   |                                           |    |  |                   |      |                                 |                                 |                                 |                                 |                                     |
|-----------------------------------|-------------------------------------------|----|--|-------------------|------|---------------------------------|---------------------------------|---------------------------------|---------------------------------|-------------------------------------|
|                                   | 9) -<br>2                                 |    |  |                   |      |                                 |                                 |                                 |                                 |                                     |
| <b>PD-1/PD-L1 (Other disease)</b> |                                           |    |  |                   |      |                                 |                                 |                                 |                                 |                                     |
| <b>Bellmu<br/>nt</b>              | (Bel<br>lmu<br>nt et<br>al.,<br>201<br>7) | OS |  | Pembrol<br>izumab | 2019 | 0·32(0·1<br>5-0·68)/<br>67      | 0·71(0·5<br>2-<br>0·97)/28<br>4 | 1·06(0·7<br>2-<br>1·55)/18<br>7 | 0·73(0·5<br>9-<br>0·91)/54<br>2 | urothelial<br>carcinoma             |
| <b>Cohen</b>                      | (Co<br>hen<br>et<br>al.,<br>201<br>9)     | OS |  | Pembrol<br>izumab | 2017 | 0·71(0·3<br>8-1·31)/<br>68      | 0·78(0·6<br>0-<br>1·02)/29<br>3 | 0·90(0·6<br>0-<br>1·35)/13<br>4 | 0·80(0·6<br>5-<br>0·98)/49<br>5 | Head and<br>Neck<br>Cancer          |
| <b>Ferris</b>                     | (Fer<br>ris<br>et<br>al.,<br>201<br>6)    | OS |  | Nivolu<br>mab     | 2016 | 0·71(0·5<br>2-<br>0·99)/27<br>6 | -                               | 0·58(0·3<br>2-1·06)/<br>70      | 0·69(0·5<br>3-<br>0·91)/36<br>1 | Head and<br>Neck<br>Cancer          |
| <b>Escudie<br/>r</b>              | (Esc<br>udie<br>r et<br>al.,<br>201<br>7) | OS |  | Nivolu<br>mab     | 2017 | 0·79(0·6<br>0-<br>1·03)/44<br>3 | -                               | 0·76(0·5<br>6-<br>1·03)/35<br>5 | -                               | Advanced<br>Renal Cell<br>Carcinoma |
| <b>Powles</b>                     | (Po<br>wles<br>et<br>al.,<br>201<br>8)-1  | OS |  | Atezoliz<br>umab  | 2017 | 0·23(0·0<br>7-0·81)/<br>30      | 1·14(0·7<br>7-<br>1·70)/13<br>6 | 0·61(0·3<br>3-1·12)/<br>67      | 0·81<br>(0·59-<br>1·10)/23<br>4 | urothelial<br>carcinoma             |
| <b>Powles</b>                     | (Po<br>wles<br>et<br>al.,<br>201<br>8)-2  | OS |  | Atezoliz<br>umab  | 2017 | 0·69(0·4<br>4-<br>1·06)/12<br>0 | 0·91(0·7<br>4-<br>1·10)/54<br>6 | 0·80(0·6<br>0-<br>1·06)/26<br>2 | 0·84<br>(0·72-<br>0·97)/93<br>1 | urothelial<br>carcinoma             |

|                 |                         |              |  |                           |      |                       |   |                       |                     |                               |
|-----------------|-------------------------|--------------|--|---------------------------|------|-----------------------|---|-----------------------|---------------------|-------------------------------|
| <b>Motzer</b>   | (Motzer et al., 2019)-1 | PFS          |  | Avelumab                  | 2019 | 0·58(0·42-0·82)/285   | - | 0·69(0·47-1·01)/274   | 0·63(0·49-0·81)/560 | Advanced Renal Cell Carcinoma |
| <b>Motzer</b>   | (Motzer et al., 2019)-2 | PFS/Subgroup |  | Avelumab                  | 2019 | 0·66(0·503-0·873)/449 | - | 0·71(0·531-0·951)/433 | 0·69(0·56-0·84)/886 | Advanced Renal Cell Carcinoma |
| <b>CTLA-4</b>   |                         |              |  |                           |      |                       |   |                       |                     |                               |
| <b>Govindan</b> | (Govindan et al., 2017) | OS           |  | Ipilimumab                | 2017 | 0·88(0·73-1·05)/339   | - | 1·19(0·71-1·99)/44    |                     | NSCLC                         |
| <b>Reck</b>     | (Reck et al., 2016)     | OS           |  | Ipilimumab                | 2016 | 1·09(0·89-1·32)/268   | - | 1·02(0·80-1·30)/172   |                     | ED-SCLC (not NSCLC)           |
| <b>Hellmann</b> | (Hellmann et al., 2018) | PFS          |  | Nivolumab plus ipilimumab | 2018 | 0·57(0·42-0·78)/130   | - | 0·58(0·43-0·77)/9     | 0·58(0·43-0·77)/139 | NSCLC                         |
| <b>Hellmann</b> | (Hellmann et al., 2019) | OS           |  | Nivolumab plus ipilimumab | 2019 | 0·77(0·64-0·92)/674   | - | 1·23(0·76-1·98)/107   |                     | NSCLC                         |

|                         |                                                   |                                    |  |                                      |      |                                 |   |                             |                                                       |                                                         |
|-------------------------|---------------------------------------------------|------------------------------------|--|--------------------------------------|------|---------------------------------|---|-----------------------------|-------------------------------------------------------|---------------------------------------------------------|
| <b>Scherpe<br/>reel</b> | (Sch<br>erpe<br>reel<br>et<br>al.,<br>201<br>9)-1 | OS/Ni<br>volum<br>ab               |  | Nivolu<br>mab                        | 2019 | 1·00(1·0<br>0-1·00)/<br>34      | - | 0·90(0·5<br>0-2·00)/<br>29  | total<br>number<br>of<br>patients<br>less than<br>100 | Malignant<br>pleural<br>mesothelio<br>ma (not<br>NSCLC) |
| <b>Scherpe<br/>reel</b> | (Sch<br>erpe<br>reel<br>et<br>al.,<br>201<br>9)-2 | OS/nivolumab<br>plus<br>ipilimumab |  | nivolum<br>ab plus<br>ipilimu<br>mab | 2019 | 1·00(1·0<br>0-1·00)/<br>36      | - | 1·30(0·6<br>0-2·50)/<br>26  | total<br>number<br>of<br>patients<br>less than<br>100 |                                                         |
| <b>MUC1</b>             |                                                   |                                    |  |                                      |      |                                 |   |                             |                                                       |                                                         |
| <b>Butts</b>            | (But<br>ts et<br>al.,<br>201<br>4)-1              | OS                                 |  | tecemoti<br>de                       | 2013 | 0·75(0·6<br>1-<br>0·92)/76<br>2 | - | 1·51(0·6<br>4-3·57)/<br>44  |                                                       |                                                         |
| <b>Butts</b>            | (But<br>ts et<br>al.,<br>201<br>4)-2              | OS                                 |  | tecemoti<br>de                       | 2013 | 1·07(0·8<br>3-<br>1·39)/40<br>2 | - | 4·90(0·9<br>3-26·00)/<br>31 |                                                       |                                                         |
| <b>Kataka<br/>mi</b>    | (Kat<br>aka<br>mi<br>et<br>al.,<br>201<br>7)      | OS                                 |  | tecemoti<br>de                       | 2017 | 0·97(0·6<br>1-<br>1·57)/11<br>5 | - | 1·07(0·3<br>0-3·80)/<br>17  |                                                       |                                                         |
| <b>VEGF</b>             |                                                   |                                    |  |                                      |      |                                 |   |                             |                                                       |                                                         |
| <b>Zalcma<br/>n</b>     | (Zal<br>cma<br>n et<br>al.,<br>201<br>6)          | OS                                 |  | bevaciz<br>umab                      | 2015 | 0·81(0·6<br>1-<br>1·08)/12<br>5 | - | 0·73<br>(0·53–<br>1·02)/ 98 | 0·77<br>(0·62-<br>0·95)/22<br>3                       | advanced<br>malignant<br>pleural<br>mesothelio<br>ma    |

|                  |                            |     |  |             |      |                        |                    |                        |                        |                                                                |
|------------------|----------------------------|-----|--|-------------|------|------------------------|--------------------|------------------------|------------------------|----------------------------------------------------------------|
| <b>Saito</b>     | (Saito et al., 2019)       | PFS |  | bevacizumab | 2019 | 0·63(0·35-1·11)/41     | 2·94(0·30-28·5)/6  | 0·54(0·33-0·90)/65     | 0·63(0·43-0·91)/112    | EGFR-positive advanced non-squamous non-small-cell lung cancer |
| <b>Scaglioti</b> | (Scaglioti et al., 2012)-1 | OS  |  | bevacizumab | 2012 | 0·944(0·805-1·106)/74  | -                  | 0·870(0·606-1·248)/186 | 0·927(0·801-1·072)/960 | advanced non-small-cell lung cancer                            |
| <b>Scaglioti</b> | (Scaglioti et al., 2012)-2 | PFS |  | bevacizumab | 2012 | 0·813(0·690-0·958)/74  | -                  | 0·911(0·650-1·27·)/186 | 0·825(0·712-0·956)/960 | advanced non-small-cell lung cancer                            |
| <b>Seto</b>      | (Seto et al., 2020)        | OS  |  | bevacizumab | 2020 | 0·953(0·778-1·168)/236 | -                  | 0·734(0·491-1·098)/59  | -                      | Advanced Nonsquamous Non-Small-Cell Lung Cancer                |
| <b>Baggstrom</b> | (Baggstrom et al., 2017)-1 | PFS |  | bevacizumab | 2017 | 1·26(0·68-2·34)/25     | 0·97(0·54-1·76)/76 | 1·00(1·00-1·00)/5      | -                      | Advanced-Stage IIIB/IV Non-Small Cell Lung Cancer              |
| <b>Baggstrom</b> | (Baggstrom et al., 2017)-2 | OS  |  | bevacizumab | 2017 | 113(0·59-2·18)/25      | 1·24(0·67-2·33)/76 | 1·00(1·00-1·00)/5      | -                      | Advanced-Stage IIIB/IV Non-Small Cell Lung Cancer              |

|                |                          |     |  |             |      |                      |                     |                     |                      |                                                              |
|----------------|--------------------------|-----|--|-------------|------|----------------------|---------------------|---------------------|----------------------|--------------------------------------------------------------|
| <b>Herbst</b>  | (Herbst et al., 2011)    | OS  |  | bevacizumab | 2011 | 1·06 (0·87-1·29)/285 | -                   | 0·44(0·21-0·94)/34  | 0·97 (0·80-1·18)/319 | advanced non-small-cell lung cancer                          |
| <b>Johnson</b> | (Johnson et al., 2013)   | PFS |  | bevacizumab | 2013 | 0·74(0·54-1·01)/129  | 0·79(0·61-1·03)/178 | 0·34(0·19-0·61)/66  | -                    | advanced non-small-cell lung cancer                          |
| <b>Zhou</b>    | (Zhou et al., 2015)      | PFS |  | bevacizumab | 2015 | 0·44(0·28-0·69)/130  | -                   | 0·34(0·22-0·52)/146 | 0·40(0·29-0·54)/276  | Advanced or Recurrent Nonsquamous Non-Small-Cell Lung Cancer |
| <b>Zinner</b>  | (Zinner et al., 2015)-1  | PFS |  | bevacizumab | 2015 | 0·85(0·60-1·10)/336  | -                   | 0·60(0·20-0·70)/23  | 0·80(0·65-1·10)/361  | advanced nonsquamous non-small-cell lung cancer              |
| <b>Zinner</b>  | (Zinner et al., 2015)-2  | OS  |  | bevacizumab | 2015 | 1·05(0·85-1·40)/336  | -                   | 0·50(0·20-0·74)/23  | 1·10(0·75-1·40)/361  | advanced nonsquamous non-small-cell lung cancer              |
| <b>Barlesi</b> | (Barlesi et al., 2014)-1 | PFS |  | bevacizumab | 2014 | 0·62(0·45-0·84)/?    | -                   | 0·42(0·24-0·74)/?   | -                    | advanced nonsquamous non-small-cell lung cancer              |
| <b>Barlesi</b> | (Barlesi et al.)         | OS  |  | bevacizumab | 2014 | 0·85(0·50-1·21)/?    | -                   | 0·73(0·32-1·66)/?   | -                    | advanced nonsquamous                                         |



|  |                 |  |  |  |  |  |  |  |  |                           |
|--|-----------------|--|--|--|--|--|--|--|--|---------------------------|
|  | al.,<br>2014)-2 |  |  |  |  |  |  |  |  | nonsmall-cell lung cancer |
|--|-----------------|--|--|--|--|--|--|--|--|---------------------------|

## Part A. Data collection and risk of bias analysis

PROSPERO registration number: CRD42019146402

Protocol Publication: Medicine MS# MD-D-19-08502\_R2

Risk of bias was assessed for gender, age, histology, ECOG performance status, randomization, ethnic groups/geographic, phase of clinical trial, and smoking status, etc.

### Supplemental Tabulation s1. Based characterization for bias assessment for PD-1/PD-L1 drugs

| First author | Ref. No. | Gender              |  |                     |
|--------------|----------|---------------------|--|---------------------|
|              |          | Male/#Patients      |  | Female/#Patients    |
| Barlesi      | [2]      | 0.83(0.64-1.08)/367 |  | 1.08(0.74-1.59)/162 |
| Mok          | [4]-1    | 0.68(0.53-0.88)/415 |  | 0.78(0.53-1.15)/184 |
| Mok          | [4]-2    | 0.71(0.57-0.88)/568 |  | 1.01(0.72-1.41)/250 |
| Mok          | [4]-3    | 0.80(0.68-0.94)/902 |  | 0.89(0.68-1.17)/372 |
| Reck         | [32]     | 0.39(0.26-0.58)/187 |  | 0.75(0.46-1.21)/118 |
| Gandhi       | [33]-1   | 0.70(0.50-0.99)/363 |  | 0.29(0.19-0.44)/253 |
| Gandhi       | [33]-2   | 0.66(0.50-0.87)/363 |  | 0.40(0.29-0.54)/253 |
| Borghaei     | [37]     | 0.73(0.56-0.96)/319 |  | 0.78(0.58-1.04)/263 |
| Wu           | [39]     | 0.71(0.50-0.90)/397 |  | 0.74(0.40-1.26)/107 |
| Carbone      | [41]-1   | 1.05(0.81-1.37)/332 |  | 1.36(0.98-1.90)/209 |
| Carbone      | [41]-2   | 0.97(0.74-1.26)/332 |  | 1.15(0.79-1.66)/209 |
| Socinski     | [42]     | 0.55(0.42-0.67)/425 |  | 0.73(0.55-0.98)/267 |
| Rittmeyer    | [43]     | 0.79(0.64-0.97)/520 |  | 0.64(0.49-0.85)/330 |
| West         | [44]-1   | 0.87(0.66-1.15)/400 |  | 0.66(0.46-0.93)/279 |
| West         | [44]-2   | 0.67(0.54-0.85)/400 |  | 0.59(0.45-0.78)/279 |
| Reck         | [45]-1   | 0.73(0.57-0.93)/479 |  | 0.82(0.61-1.12)/321 |
| Reck         | [45]-2   | 0.82(0.64-1.04)/480 |  | 0.88(0.65-1.19)/322 |

|             |        |                     |  |                     |
|-------------|--------|---------------------|--|---------------------|
| Antonia     | [46]   | 0.56(0.44-0.71)/500 |  | 0.54(0.37-0.79)/213 |
| Antonia     | [47]   | 0.78(0.59-1.03)/500 |  | 0.46(0.30-0.73)/213 |
| Govindan    | [18]   | 0.85(0.71-1.02)/635 |  | 1.33(0.84-2.11)/114 |
| Reck        | [19]   | 1.07(0.89-1.28)/643 |  | 1.06(0.81-1.37)/311 |
| Hellmann    | [20]   | 0.52(0.36-0.74)/204 |  | 0.70(0.41-1.20)/ 95 |
| Hellmann    | [21]   | 0.75(0.61-0.93)/515 |  | 0.91(0.69-1.21)/278 |
| Scherpereel | [22]-1 | 0.80(0.30-2.00)/ 47 |  | 1.00(0.30-1.70)/ 16 |
| Scherpereel | [22]-2 | 0.60(0.30-1.50)/ 53 |  | 1.00(0.30-1.70)/ 9  |

| First author | Ref. No. | ECOG                |  |                     |
|--------------|----------|---------------------|--|---------------------|
|              |          | 0                   |  | 1                   |
| Barlesi      | [2]      | 0.73(0.50-1.08)/187 |  | 0.99(0.77-1.28)/349 |
| Mok          | [4]-1    | 0.57(0.37-0.86)/187 |  | 0.74(0.58-0.95)/412 |
| Mok          | [4]-2    | 0.71(0.49-1.01)/253 |  | 0.80(0.65-0.98)/565 |
| Mok          | [4]-3    | 0.77(0.59-1.05)/390 |  | 0.83(0.71-0.98)/884 |
| Reck         | [32]     | 0.45(0.26-0.77)/107 |  | 0.51(0.35-0.73)/197 |
| Gandhi       | [33]-1   | 0.44(0.28-0.71)/266 |  | 0.53(0.39-0.73)/346 |
| Gandhi       | [33]-2   | 0.49(0.35-0.68)/266 |  | 0.56(0.43-0.72)/346 |
| Borghaei     | [37]     | 0.64(0.44-0.93)/179 |  | 0.80(0.63-1.00)/402 |
| Wu           | [39]     | 1.01(0.50-2.00)/68  |  | 0.69(0.52-0.90)/435 |
| Carbone      | [41]-1   | 1.69(1.18-2.42)/178 |  | 1.01(0.79-1.30)/362 |
| Carbone      | [41]-2   | 1.11(0.74-1.66)/178 |  | 1.02(0.79-1.32)/362 |
| Socinski     | [42]     | 0.55(0.40-0.73)/282 |  | 0.64(0.50-0.80)/404 |
| Rittmeyer    | [43]     | 0.78(0.58-1.04)/315 |  | 0.68(0.56-0.84)/535 |
| West         | [44]-1   | 0.85(0.59-1.22)/280 |  | 0.77(0.58-1.00)/397 |
| West         | [44]-2   | 0.59(0.44-0.78)/280 |  | 0.68(0.54-0.86)/397 |
| Reck         | [45]-1   | 0.75(0.53-1.07)/338 |  | 0.75(0.59-0.94)/456 |
| Reck         | [45]-2   | 0.85(0.61-1.18)/359 |  | 0.84(0.67-1.06)/440 |
| Antonia      | [46]     | -                   |  | -                   |
| Antonia      | [47]     | -                   |  | -                   |
| Govindan     | [18]     | 0.99(0.73-1.33)/259 |  | 0.86(0.70-1.05)/485 |
| Reck         | [19]     | 1.28(0.98-1.69)/284 |  | 0.99(0.83-1.18)/668 |
| Hellmann     | [20]     | 0.62(0.38-1.02)/105 |  | 0.55(0.38-0.80)/192 |
| Hellmann     | [21]     | 0.66(0.48-0.89)/269 |  | 0.89(0.73-1.09)/510 |
| Scherpereel  | [22]-1   | -                   |  | -                   |
| Scherpereel  | [22]-2   | -                   |  | -                   |

| First author | Ref. No. | Histology           |  |                     |
|--------------|----------|---------------------|--|---------------------|
|              |          | Squamous            |  | Non-Squamous        |
| Barlesi      | [2]      | 0.70(0.48-1.01)/180 |  | 1.02(0.79-1.33)/349 |
| Mok          | [4]-1    | 0.53(0.38-0.75)/221 |  | 0.82(0.63-1.07)/378 |
| Mok          | [4]-2    | 0.65(0.49-0.87)/304 |  | 0.85(0.68-1.08)/514 |
| Mok          | [4]-3    | 0.75(0.60-0.93)/492 |  | 0.86(0.72-1.03)/782 |
| Reck         | [32]     | 0.35(0.17-0.71)/ 56 |  | 0.55(0.39-0.76)/249 |
| Gandhi       | [33]-1   | -                   |  | -                   |
| Gandhi       | [33]-2   | -                   |  | -                   |
| Borghaei     | [37]     | -                   |  | -                   |
| Wu           | [39]     | 0.61(0.40-0.90)/200 |  | 0.76(0.60-1.05)/304 |
| Carbone      | [41]-1   | 0.83(0.54-1.26)/129 |  | 1.29(1.02-1.63)/412 |
| Carbone      | [41]-2   | 0.82(0.54-1.24)/129 |  | 1.17(0.91-1.52)/412 |
| Socinski     | [42]     | -                   |  | -                   |
| Rittmeyer    | [43]     | 0.73(0.54-0.98)/222 |  | 0.73(0.60-0.89)/628 |
| West         | [44]-1   | -                   |  | -                   |
| West         | [44]-2   | -                   |  | -                   |
| Reck         | [45]-1   | -                   |  | -                   |
| Reck         | [45]-2   | -                   |  | -                   |
| Antonia      | [46]     | 0.68(0.50-0.92)/326 |  | 0.45(0.33-0.59)/387 |
| Antonia      | [47]     | 0.72(0.52-0.99)/326 |  | 0.61(0.44-0.86)/387 |
| Govindan     | [18]     | -                   |  | -                   |
| Reck         | [19]     | -                   |  | -                   |
| Hellmann     | [20]     | 0.63(0.39-1.04)/100 |  | 0.55(0.38-0.80)/199 |
| Hellmann     | [21]     | 0.69(0.52-0.92)/236 |  | 0.85(0.69-1.04)/557 |
| Scherpereel  | [22]-1   | -                   |  | -                   |
| Scherpereel  | [22]-2   | -                   |  | -                   |

| First author | Ref. No. | Age                 |                     |                     |
|--------------|----------|---------------------|---------------------|---------------------|
|              |          | >=75                | 65-75               | <65                 |
| Barlesi      | [2]      | 0.98(0.71-1.34)/250 |                     | 0.84(0.63-1.13)/279 |
| Mok          | [4]-1    | 0.58(0.42-0.80)/271 |                     | 0.81(0.60-1.08)/328 |
| Mok          | [4]-2    | 0.71(0.54-0.92)/378 |                     | 0.84(0.65-1.08)/440 |
| Mok          | [4]-3    | 0.82(0.66-1.01)/567 |                     | 0.81(0.67-0.98)/707 |
| Reck         | [32]     | 0.45(0.29-0.70)/164 |                     | 0.61(0.40-0.92)/141 |
| Gandhi       | [33]-1   | 0.64(0.43-0.95)/304 |                     | 0.43(0.21-0.61)/312 |
| Gandhi       | [33]-2   | 0.75(0.55-1.02)/304 |                     | 0.43(0.32-0.56)/312 |
| Borghaei     | [37]     | 0.90(0.43-1.87)/ 43 | 0.63(0.45-0.89)/200 | 0.81(0.62-1.04)/339 |

|             |        |                     |                     |                     |
|-------------|--------|---------------------|---------------------|---------------------|
| Wu          | [39]   | 0.50(0.20-0.76)/127 |                     | 0.76(0.60-1.00)/377 |
| Carbone     | [41]-1 | 1.21(0.91-1.62)/260 |                     | 1.17(0.88-1.56)/281 |
| Carbone     | [41]-2 | 1.04(0.77-1.41)/260 |                     | 1.13(0.83-1.54)/281 |
| Socinski    | [42]   | 0.78(0.42-1.50)/ 64 | 0.52(0.35-0.67)/248 | 0.65(0.52-0.80)/375 |
| Rittmeyer   | [43]   | 0.66(0.52-0.83)/397 |                     | 0.80(0.64-1.00)/453 |
| West        | [44]-1 | 0.78(0.58-1.05)/338 |                     | 0.79(0.58-1.08)/341 |
| West        | [44]-2 | 0.64(0.50-0.82)/338 |                     | 0.64(0.50-0.82)/341 |
| Reck        | [45]-1 | 0.94(0.50-1.76)/ 72 | 0.69(0.49-0.96)/281 | 0.78(0.60-1.00)/441 |
| Reck        | [45]-2 | 0.83(0.41-1.65)/ 65 | 0.97(0.71-1.32)/284 | 0.76(0.59-0.98)/449 |
| Antonia     | [46]   | 0.74(0.54-1.01)/322 |                     | 0.43(0.32-0.57)/391 |
| Antonia     | [47]   | 0.76(0.55-1.06)/322 |                     | 0.62(0.44-0.86)/391 |
| Govindan    | [18]   | 0.85(0.51-1.43)/ 71 | 1.06(0.81-1.37)/298 | 0.82(0.64-1.04)/380 |
| Reck        | [19]   | 0.70(0.40-1.20)/ 72 | 1.14(0.87-1.49)/306 | 1.08(0.90-1.31)/576 |
| Hellmann    | [20]   | 0.42(0.14-1.30)/ 27 | 0.62(0.40-0.97)/143 | 0.51(0.34-0.77)/156 |
| Hellmann    | [21]   | 0.92(0.57-1.48)/ 81 | 0.91(0.70-1.19)/306 | 0.70(0.55-0.89)/406 |
| Scherpereel | [22]-1 | -                   |                     | -                   |
| Scherpereel | [22]-2 | -                   |                     | -                   |

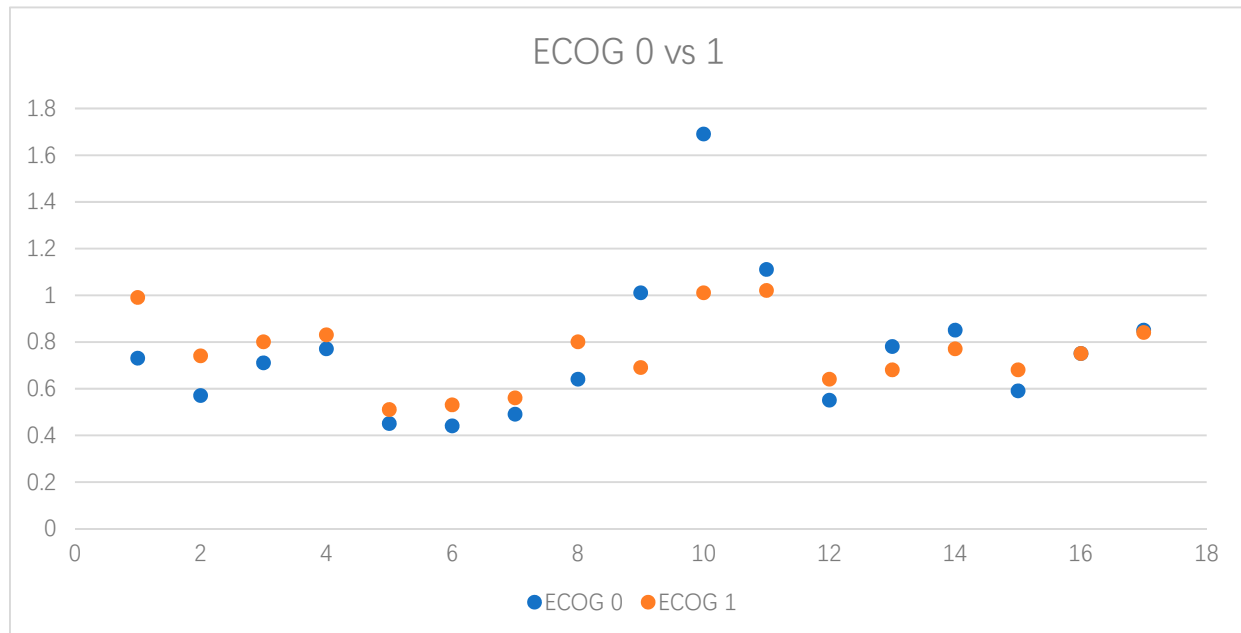

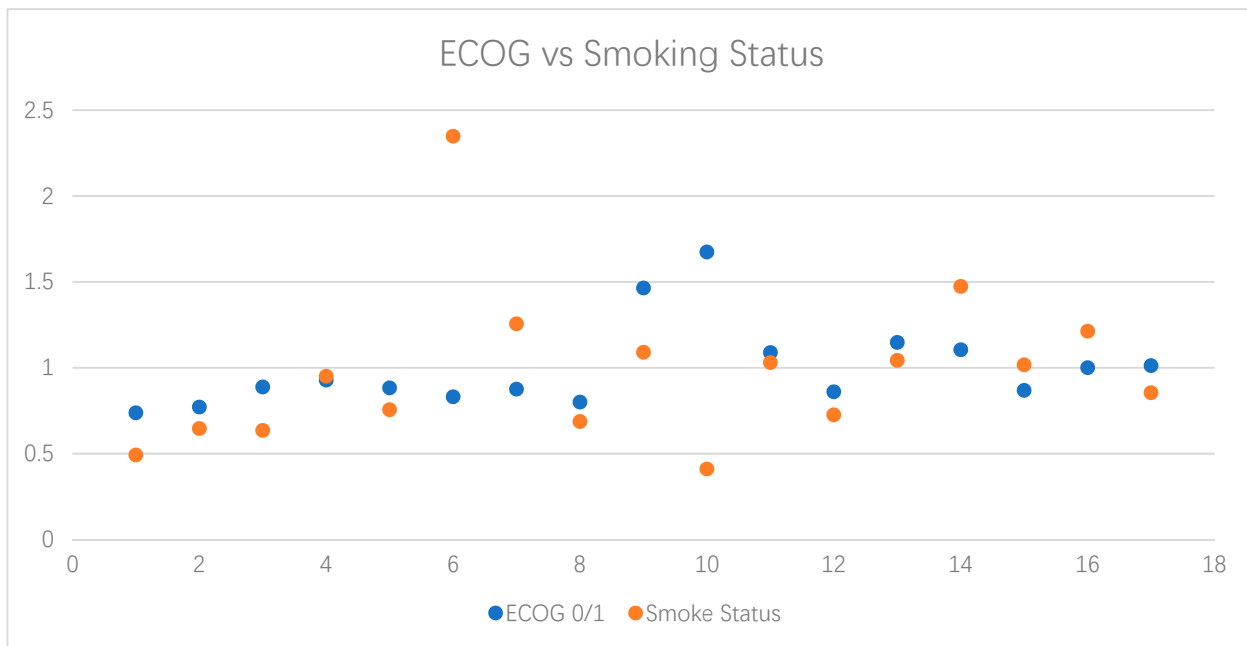

**Supplemental Figure s1. No obvious influence of ECOG types on the OS and PFS ratio of patients of smoker and non-smokers.**

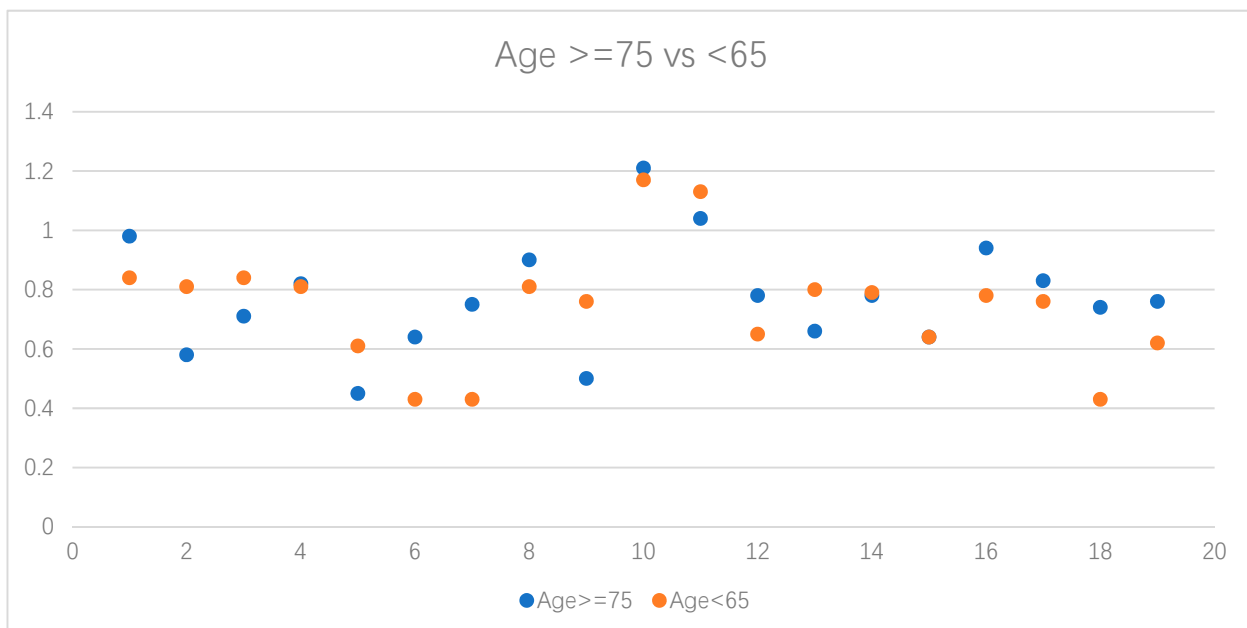

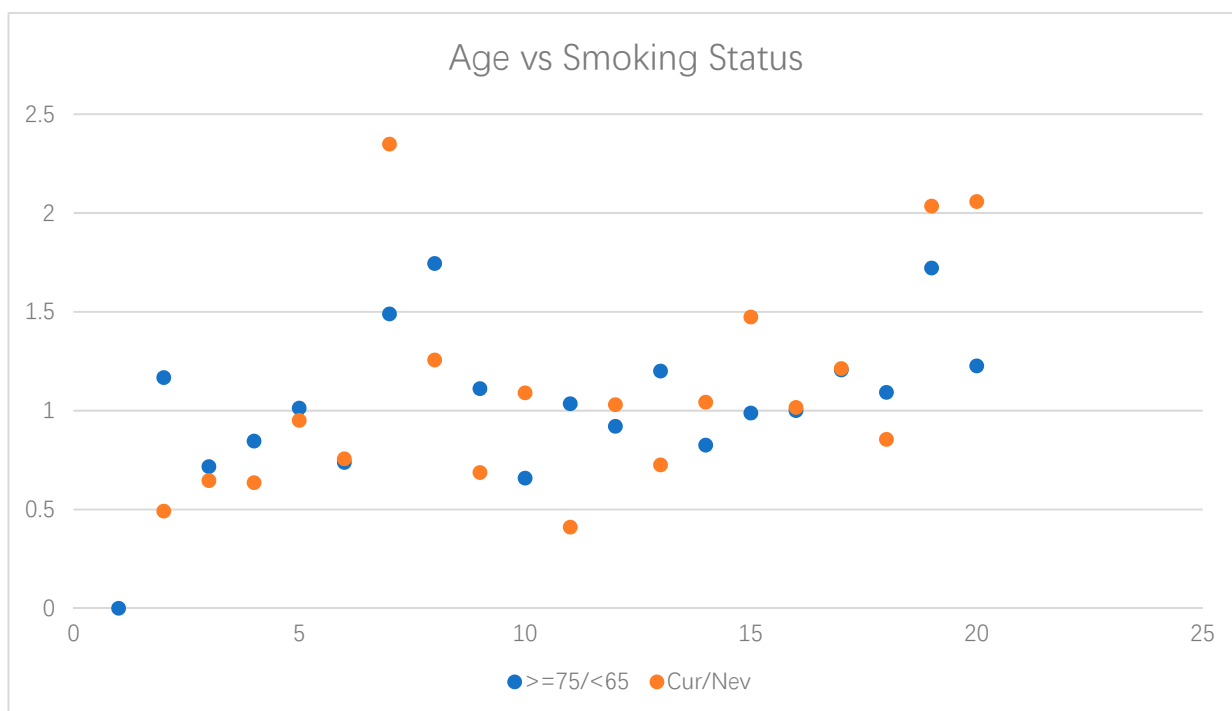

**Supplemental Figure s2. Influence of age on the OS and PFS ratio of patients of smoker and non-smokers.**

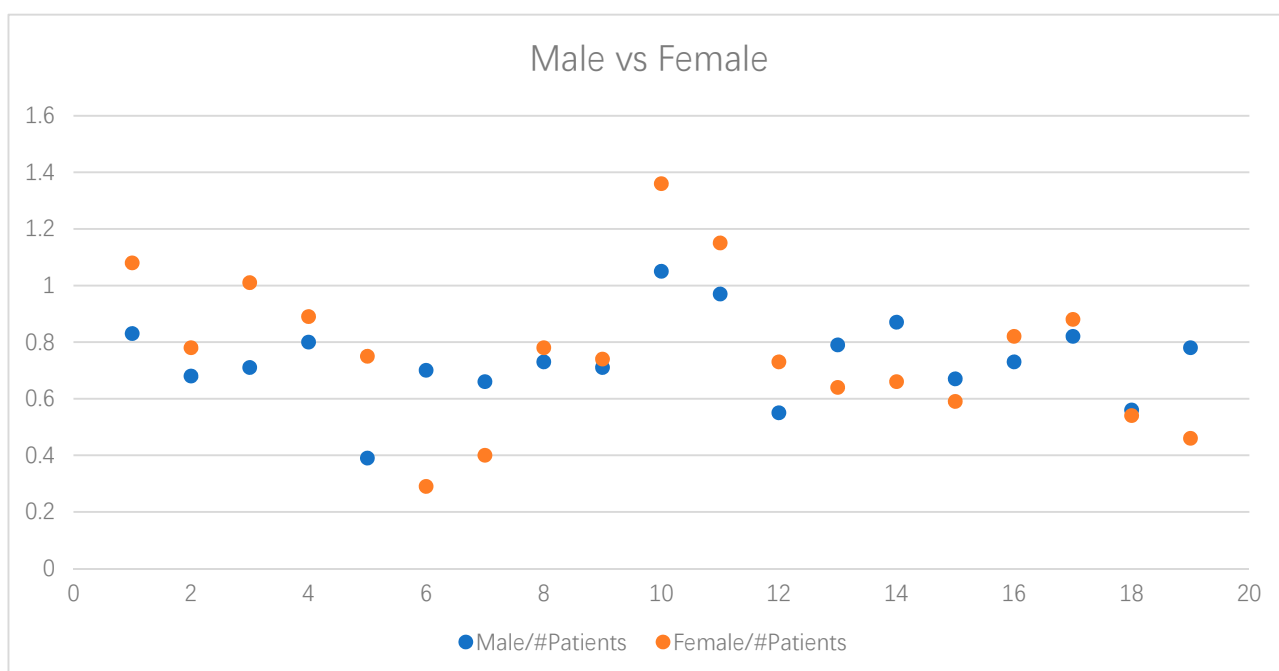

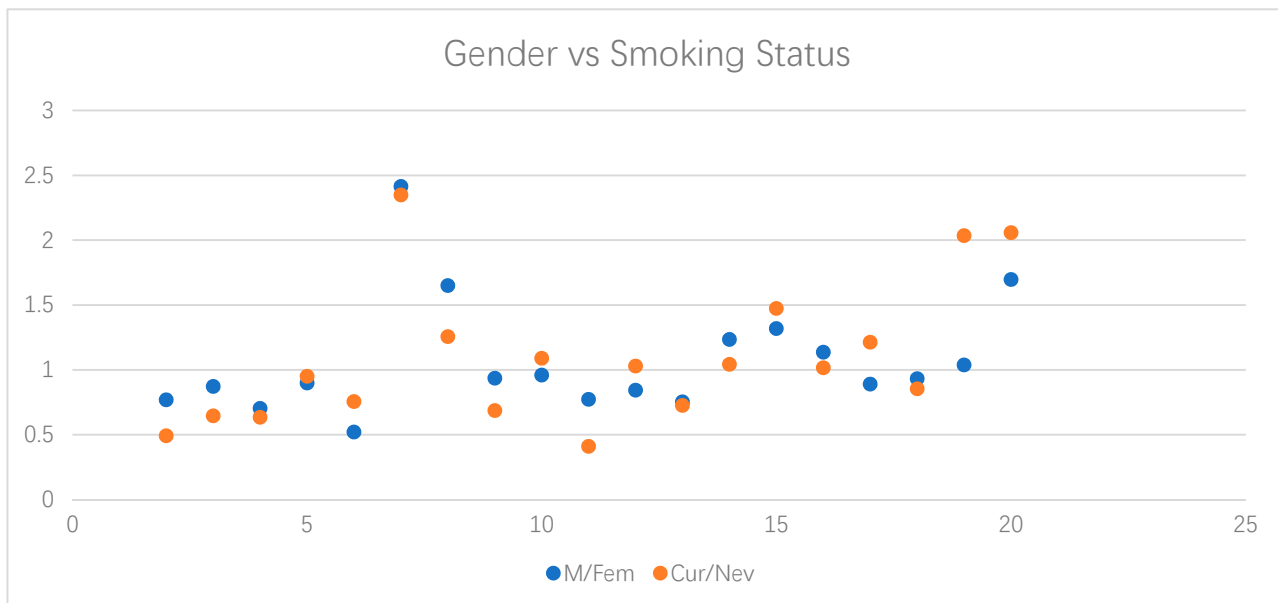

**Supplemental Figure s3. No obvious influence of gender on the OS and PFS ratio of patients of smoker and non-smokers.**

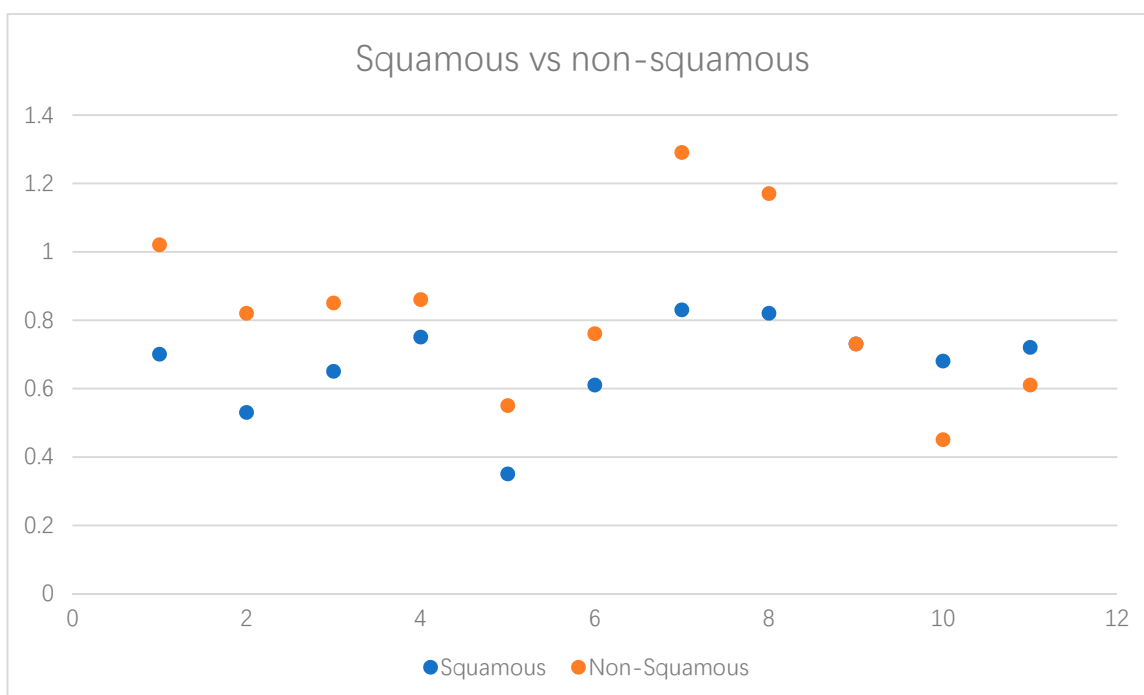

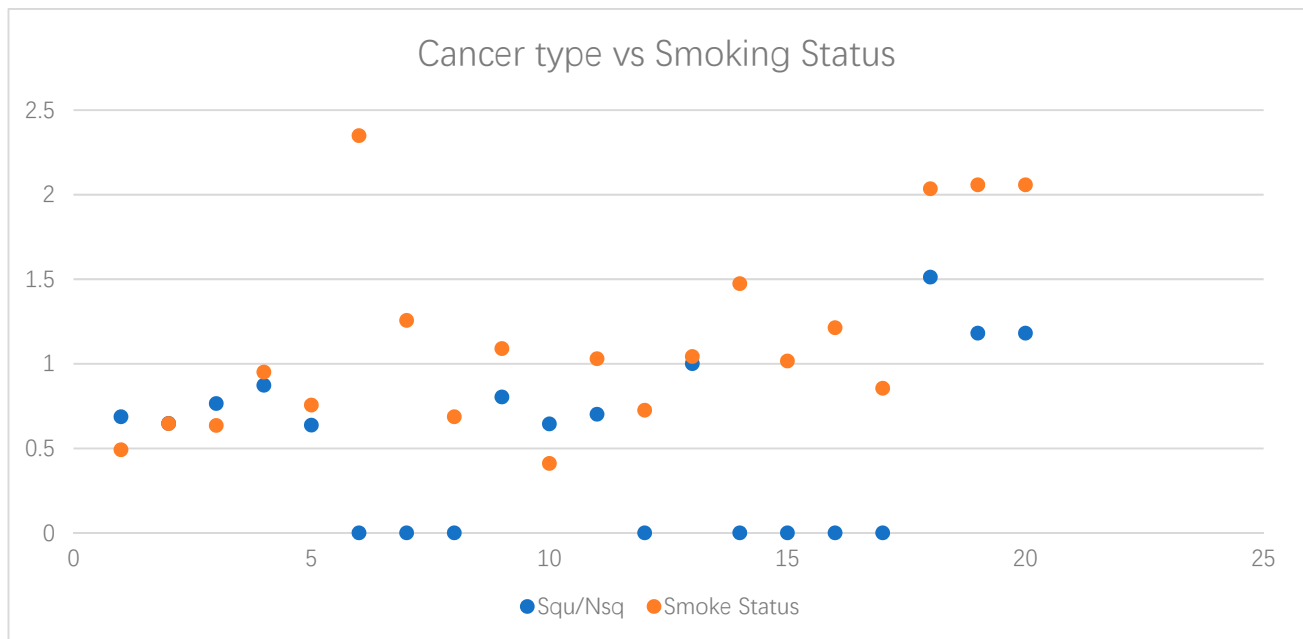

**Supplemental Figure s4. No obvious influence of Histology types (Squamous, non-squamous) on the OS and PFS ratio of patients of smoker and non-smokers**

**Supplemental Tabulation s2. Additional characterization of clinical trials for bias assessment**



| First author | Ref. No. | ANALYTIC METRIX | first/second         | Drugs                     | year |
|--------------|----------|-----------------|----------------------|---------------------------|------|
| Barlesi      | [2]      | OS              | Monotherapy          | Avelumab                  | 2018 |
| Mok          | [4]-1    | OS/TPS≥50%      | First line           | Pembrolizumab             | 2019 |
| Mok          | [4]-2    | OS/TPS≥20%      | First line           | Pembrolizumab             | 2019 |
| Mok          | [4]-3    | OS/TPS≥1%       | First line           | Pembrolizumab             | 2019 |
| Reck         | [32]     | PFS             | First line           | Pembrolizumab             | 2016 |
| Gandhi       | [33]-1   | OS              | Multitherapy         | Pembrolizumab             | 2016 |
| Gandhi       | [33]-2   | PFS             | Multitherapy         | Pembrolizumab             | 2016 |
| Borghaei     | [37]     | OS              | Monotherapy          | Nivolumab                 | 2015 |
| Wu           | [39]     | OS              | Second               | Nivolumab                 | 2019 |
| Carbone      | [41]-1   | PFS             | First line           | Nivolumab                 | 2017 |
| Carbone      | [41]-2   | OS              | First line           | Nivolumab                 | 2017 |
| Socinski     | [42]     | PFS             | First line           | Atezolizumab              | 2018 |
| Rittmeyer    | [43]     | OS              | Monotherapy          | Atezolizumab              | 2017 |
| West         | [44]-1   | Os              | Multitherapy         | Atezolizumab              | 2019 |
| West         | [44]-2   | PFS             | Multitherapy         | Atezolizumab              | 2019 |
| Reck         | [45]-1   | OS/ABCP vs BCP  | multitherapy         | Atezolizumab              | 2019 |
| Reck         | [45]-2   | OS/ACP vs BCP   | multitherapy         | Atezolizumab              | 2019 |
| Antonia      | [46]     | PFS             | Second or Third line | Durvalumab                | 2017 |
| Antonia      | [47]     | OS              | Second or Third line | Durvalumab                | 2018 |
|              |          |                 |                      |                           |      |
|              |          |                 |                      |                           |      |
|              |          |                 |                      |                           |      |
|              |          |                 |                      |                           |      |
|              |          |                 |                      |                           |      |
| first author | Ref. No. | ANALYTIC METRIX | Other cancer         | Drugs                     | year |
| Bellmunt     | [48]     | OS              |                      | Pembrolizumab             | 2019 |
| Cohen        | [49]     | OS              |                      | Pembrolizumab             | 2017 |
| Ferris       | [50]     | OS              |                      | Nivolumab                 | 2016 |
| Escudier     | [51]     | OS              |                      | Nivolumab                 | 2017 |
| Powles       | [52]-1   | OS Subgroup     |                      | Atezolizumab              | 2017 |
| Powles       | [52]-2   | OS              |                      | Atezolizumab              | 2017 |
| Motzer       | [53]-1   | PFS Subgroup    |                      | Avelumab                  | 2019 |
| Motzer       | [53]-2   | PFS             |                      | Avelumab                  | 2019 |
|              |          |                 |                      |                           |      |
|              |          |                 |                      |                           |      |
|              |          |                 |                      |                           |      |
| first author | Ref. No. | ANALYTIC METRIX |                      | Drugs                     | year |
| Govindan     | [18]     | OS              |                      | Ipilimumab                | 2017 |
| Reck         | [19]     | OS              |                      | Ipilimumab                | 2016 |
| Hellmann     | [20]     | PFS             |                      | Nivolumab plus ipilimumab | 2018 |

|                     |                 |                              |  |                                                                                   |             |
|---------------------|-----------------|------------------------------|--|-----------------------------------------------------------------------------------|-------------|
| Hellmann            | [21]            | OS                           |  | Nivolumab plus ipilimumab                                                         | 2019        |
| Scherpereel         | [22]-1          | OS/Nivolumab                 |  | Nivolumab                                                                         | 2019        |
| Scherpereel         | [22]-2          | OS/nivolumab plus ipilimumab |  | nivolumab plus ipilimumab                                                         | 2019        |
|                     |                 |                              |  |                                                                                   |             |
| <b>first author</b> | <b>Ref. No.</b> | <b>ANALYTIC METRIX</b>       |  | <b>Drugs</b>                                                                      | <b>year</b> |
| Butts               | [25]-1          | OS                           |  | tecemotide                                                                        | 2013        |
| Butts               | [25]-2          | OS                           |  | tecemotide                                                                        | 2013        |
| Katakami            | [26]            | OS                           |  | tecemotide                                                                        | 2017        |
|                     |                 |                              |  |                                                                                   |             |
| <b>first author</b> | <b>Ref. No.</b> | <b>ANALYTIC METRIX</b>       |  | <b>Drugs</b>                                                                      | <b>year</b> |
| Zalcman             | [59]            | OS                           |  | bevacizumab when added to the present standard of care, cisplatin plus pemetrexed | 2015        |
| Saito               | [60]            | PFS                          |  | Erlotinib plus bevacizumab versus erlotinib alone                                 | 2019        |
| Scagliotti          | [61]-1          | Os                           |  | Sunitinib plus erlotinib                                                          | 2012        |
| Scagliotti          | [61]-2          | PFS                          |  | Sunitinib plus erlotinib                                                          | 2012        |
| Seto                | [62]            | OS                           |  | Maintenance Bevacizumab With or Without Pemetrexed                                | 2020        |
| Baggstrom           | [63]-1          | PFS                          |  | Maintenance Sunitinib                                                             | 2017        |
| Baggstrom           | [63]-2          | OS                           |  | Maintenance Sunitinib                                                             | 2017        |
| Herbst              | [64]            | OS                           |  | bevacizumab plus erlotinib versus erlotinib alone                                 | 2011        |
| Johnson             | [65]            | PFS                          |  | bevacizumab                                                                       | 2013        |

|        |        |     |  |                                         |      |
|--------|--------|-----|--|-----------------------------------------|------|
| Zhou   | [66]   | PFS |  | Carboplatin/Paclitaxel Plus Bevacizumab | 2015 |
| Zinner | [67]-1 | PFS |  | Pac+Cb+Bev                              | 2015 |
| Zinner | [67]-2 | OS  |  | Pac+Cb+Bev                              | 2015 |

**Supplemental Tabulation s3. Additional characterization of clinical trials for bias assessment for drugs of anti-PD-1 with anti-CTLA4.**

| Category       | first author      |  | Hellmann                  | Hellmann                  | Scherpereel                  |
|----------------|-------------------|--|---------------------------|---------------------------|------------------------------|
|                | Ref. No.          |  | [20]                      | [21]                      | [22]-2                       |
|                | ANALYTIC METRIX   |  | PFS                       | OS                        | OS/nivolumab plus ipilimumab |
|                | first/second      |  |                           |                           |                              |
|                | Drugs             |  | Nivolumab plus ipilimumab | Nivolumab plus ipilimumab | nivolumab plus ipilimumab    |
|                | year              |  | 2018                      | 2019                      | 2019                         |
|                | Current/#Patients |  | 0.57(0.42-0.78)/276       | 0.77(0.64-0.92)/674       | 1.00(0.60-1.40)/ 36          |
| Smoking Status | Former/#Patients  |  | -                         | -                         | -                            |
|                | Never/#Patients   |  | 0.58(0.43-0.77)/ 23       | 1.23(0.76-1.98)/107       | 1.30(0.60-2.50)/ 26          |
|                | Overall/#Patients |  | 0.58(0.43-0.77)/299       | 0.79(0.65-0.96)/793       | -                            |
|                | Male/#Patients    |  | 0.52(0.36-0.74)/204       | 0.75(0.61-0.93)/515       | 0.60(0.30-1.50)/ 53          |
| Gender         |                   |  |                           |                           |                              |
|                | Female/#Patients  |  | 0.70(0.41-1.20)/ 95       | 0.91(0.69-1.21)/278       | 1.00(0.30-1.70)/ 9           |
|                | >=75              |  | 0.42(0.14-1.30)/ 27       | 0.92(0.57-1.48)/ 81       | -                            |
| Age            | 65-75             |  | 0.62(0.40-0.97)/143       | 0.91(0.70-1.19)/306       |                              |
|                | <65               |  | 0.51(0.34-0.77)/156       | 0.70(0.55-0.89)/406       | -                            |
|                | Squamous          |  | 0.63(0.39-1.04)/100       | 0.69(0.52-0.92)/236       | -                            |
| Histology      |                   |  |                           |                           |                              |
|                | Non-Squamous      |  | 0.55(0.38-0.80)/199       | 0.85(0.69-1.04)/557       | -                            |
|                | 0                 |  | 0.62(0.38-1.02)/105       | 0.66(0.48-0.89)/269       | -                            |
| ECOG           |                   |  |                           |                           |                              |
|                | 1                 |  | 0.55(0.38-0.80)/192       | 0.89(0.73-1.09)/510       | -                            |

|  |          |                                                                                                                                                                                                                                                                                              |                                                                                                                                                                                                                                                                                                                                                                                                              |
|--|----------|----------------------------------------------------------------------------------------------------------------------------------------------------------------------------------------------------------------------------------------------------------------------------------------------|--------------------------------------------------------------------------------------------------------------------------------------------------------------------------------------------------------------------------------------------------------------------------------------------------------------------------------------------------------------------------------------------------------------|
|  | Authors  | Hellmann MD, Ciuleanu TE, Pluzanski A, Lee JS, Otterson GA, Audigier-Valette C, Minenza E, Linardou H, Burgers S, Salman P, Borghaei H, Ramalingam SS, Brahmer J, Reck M, O'Byrne KJ, Geese WJ, Green G, Chang H, Szustakowski J, Bhagavatheeswaran P, Healey D, Fu Y, Nathan F, Paz-Ares L. | Hellmann MD, Paz-Ares L, Bernabe Caro R, Zurawski B, Kim SW, Carcereny Costa E, Park K, Alexandru A, Lupinacci L, de la Mora Jimenez E, Sakai H, Albert I, Vergnenegre A, Peters S, Syrigos K, Barlesi F, Reck M, Borghaei H, Brahmer JR, O'Byrne KJ, Geese WJ, Bhagavatheeswaran P, Rabindran SK, Kasinathan RS, Nathan FE, Ramalingam SS. Nivolumab plus Ipilimumab in Advanced Non-Small-Cell Lung Cancer |
|  | Titles   | Nivolumab plus Ipilimumab in Lung Cancer with a High Tumor Mutational Burden.                                                                                                                                                                                                                | Nivolumab plus Ipilimumab in Advanced Non-Small-Cell Lung Cancer                                                                                                                                                                                                                                                                                                                                             |
|  | category | NSCLC                                                                                                                                                                                                                                                                                        | NSCLC                                                                                                                                                                                                                                                                                                                                                                                                        |

## PART B. Article information Questionnaires

**Email title:** Information regarding your publication: “Journal name, Year, Page numbers”.

**Email set:** Highly important

**Email content:**

Dear Dr. XXXXX

I am writing to you, on behalf the investigator group on smoking status and response to drug treatment of cancer patients, for potential additional information from your publication titled “ XXXXXXXX”. We would appreciate very much if you could provide the hazard ratio of patients with different smoking status including the range and possibly the P values. Please also let us know whether the data could be a duplicates of other related publications.

The information will be used in a manuscript of review and meta-analysis for cancer drugs. You will be acknowledged for your information in the paper, or be as a co-author if you desire and have time to assist on the manuscript, whatever you prefer.

In considering the days of manuscript preparation, we would appreciate very much if you respond immediate on the availability of such a data and send the data before or on the end of two weeks from the date of this email.

An example of information is provided below for your consideration

### Supplemental Tabulation s4. Example of data confirmation with authors.

| Drugs | Study (First Author)/analytic Metrix | PD-1 Positive | Current smokers/#Patients | Former smokers /# Patients | Never smoke /# Patients | Overall/# Patients | Note |
|-------|--------------------------------------|---------------|---------------------------|----------------------------|-------------------------|--------------------|------|
|-------|--------------------------------------|---------------|---------------------------|----------------------------|-------------------------|--------------------|------|

|                      |                                                                     |                                                         |                     |                       |                     |                      |                                                                     |
|----------------------|---------------------------------------------------------------------|---------------------------------------------------------|---------------------|-----------------------|---------------------|----------------------|---------------------------------------------------------------------|
| <b>Pembrolizumab</b> | Reck/ versus Chemotherapy /HR for Disease progression or death [20] | All are PD-L1 expression on at least 50% of tumor cells | 0.68 (0.36-1.31)/65 | 0.47 (0.33-0.67) /216 | 0.90 (0.11-7.59)/24 | 0.50 (0.37-0.68)/305 | First line treatment / Open-label/Randomly assigned to 305 patients |
|----------------------|---------------------------------------------------------------------|---------------------------------------------------------|---------------------|-----------------------|---------------------|----------------------|---------------------------------------------------------------------|

#### Email sending days:

Initial sending date: July 18, 2019;

Reminding date: July 28, 2019.

Kindly remind the previous email regarding information in your publication “ “.

### PART C. Comparison response to treatment between smokers and non-smokers in cancer patients treated with anti-PD-1/PD-L1, CTLA-4 and MUC1 drugs.

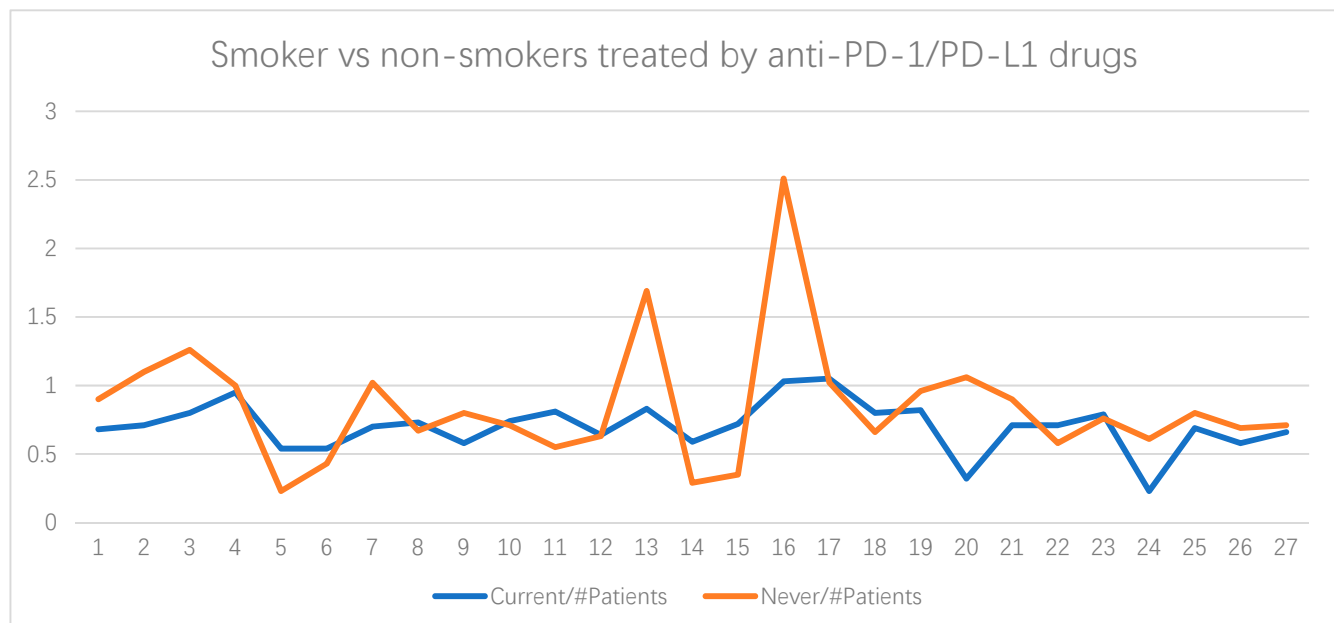

**Supplemental Figure s5. Response to treatment by anti-PD-1/PD-L1 drugs between smoker and non-smokers.**

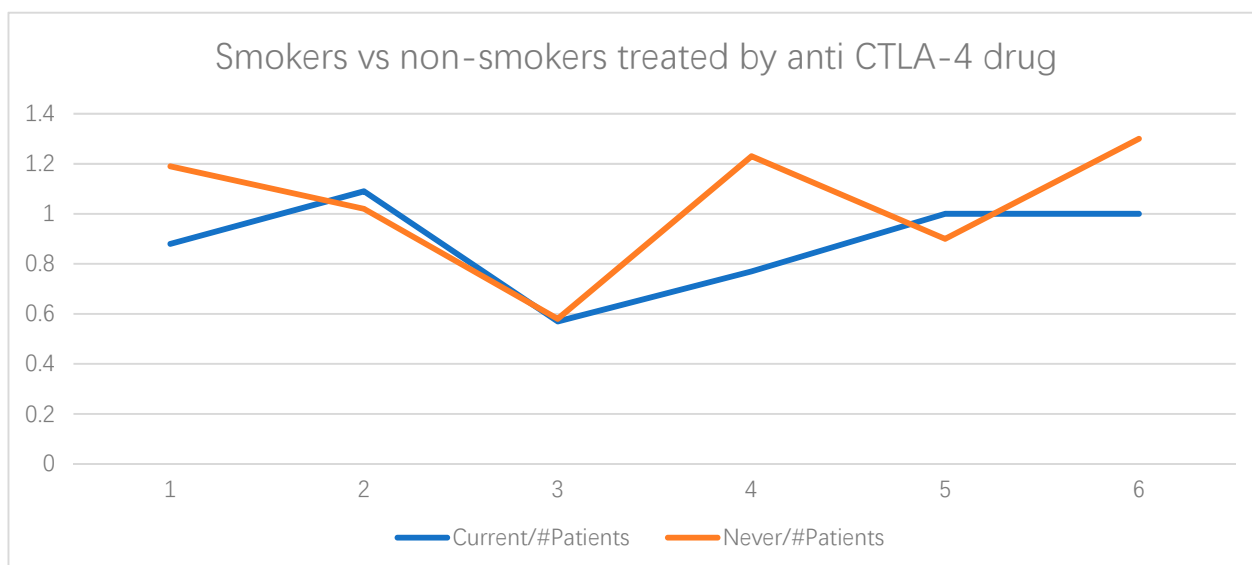

**Supplemental Figure s6. Response to treatment by anti-CTLA-4 drug between smoker and non-smokers.**

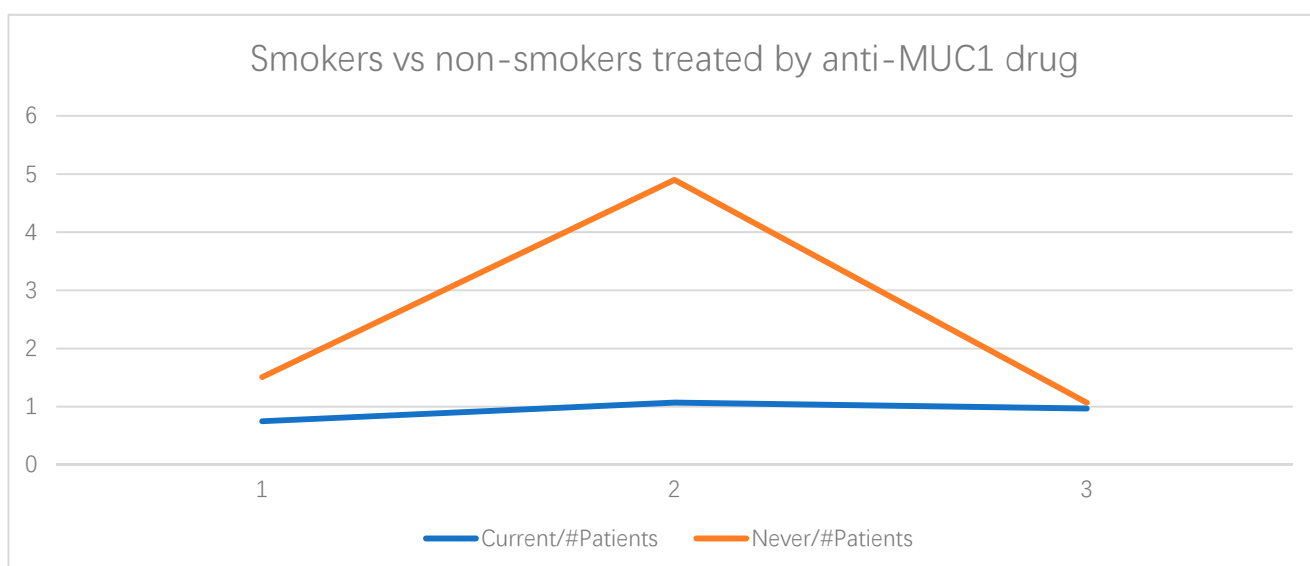

**Supplemental Figure s7. Response to treatment by anti-MUC1 drug between smoker and non-smokers.**

## PART D. Meta-analysis data on subgroups of NSCLC patients treated with anti-PD-1/PD-L1, CTLA-4 and MUC1 drugs

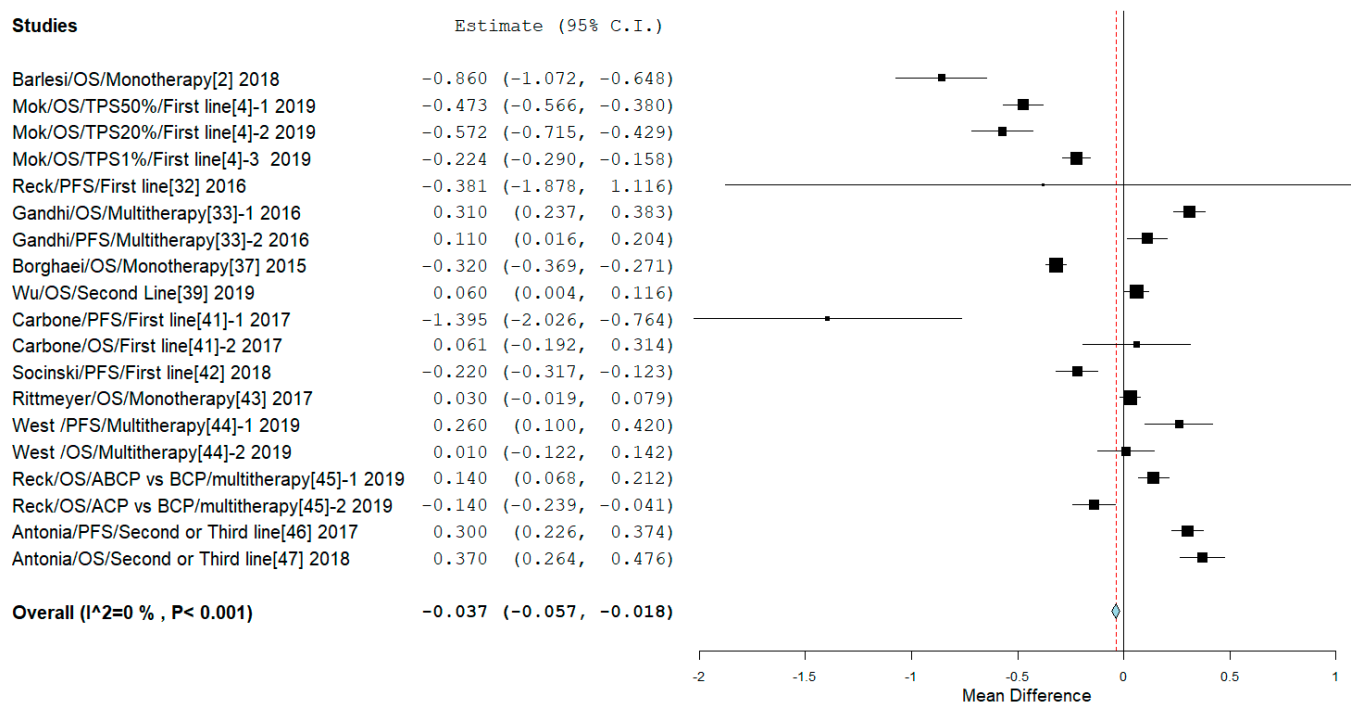

Supplemental Figure s8. Response to treatment by anti-PD-1/PD-L1 drugs between smoker and non-smokers using fixed effect (FE) model.

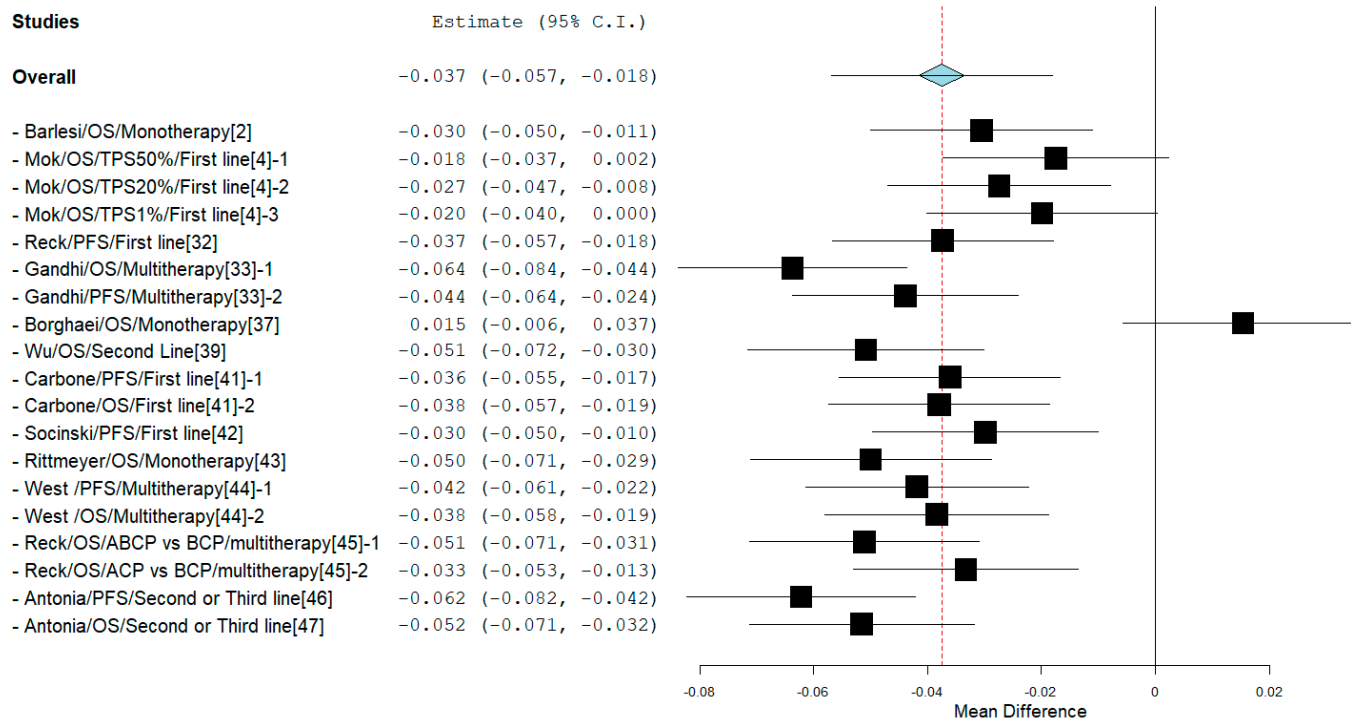

**Supplemental Figure s9. Response to treatment by anti-PD-1/PD-L1 drugs between smoker and non-smokers using FE leave-one-out model.**



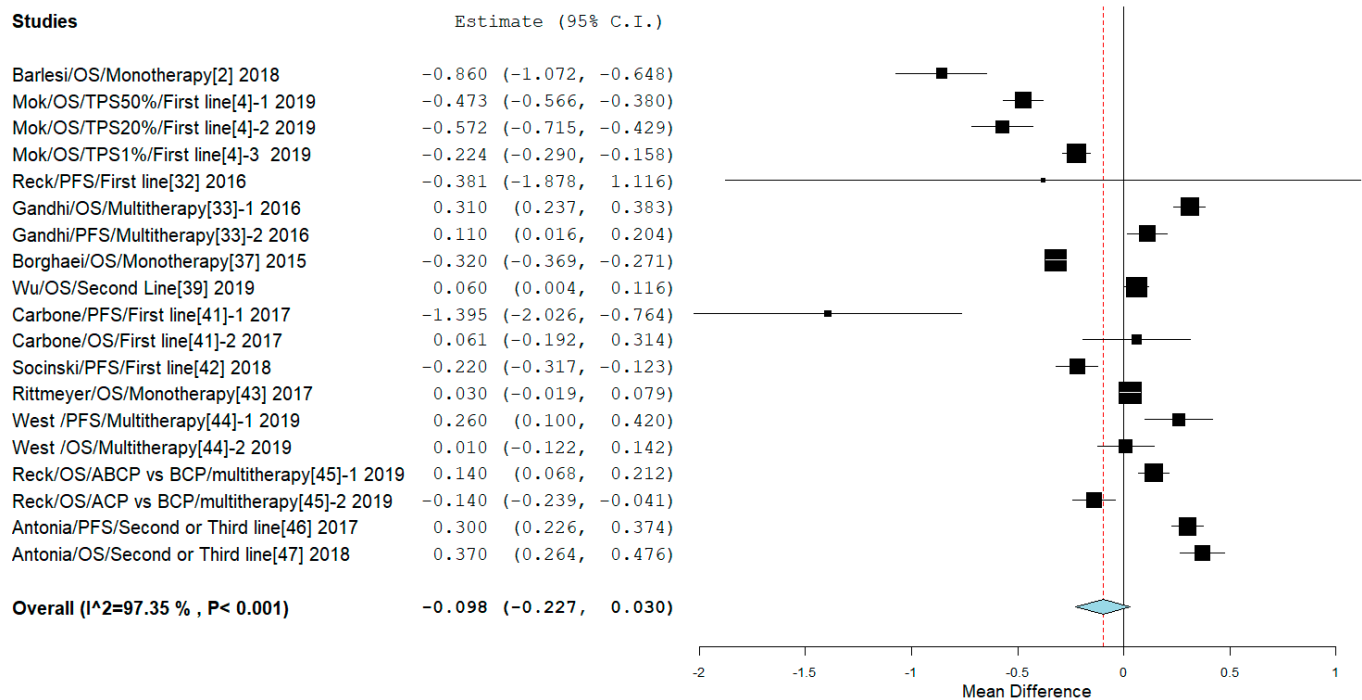

**Supplemental Figure s10. Response to treatment by anti-PD-1/PD-L1 drugs between smoker and non-smokers using randomized effect (RE) model.**

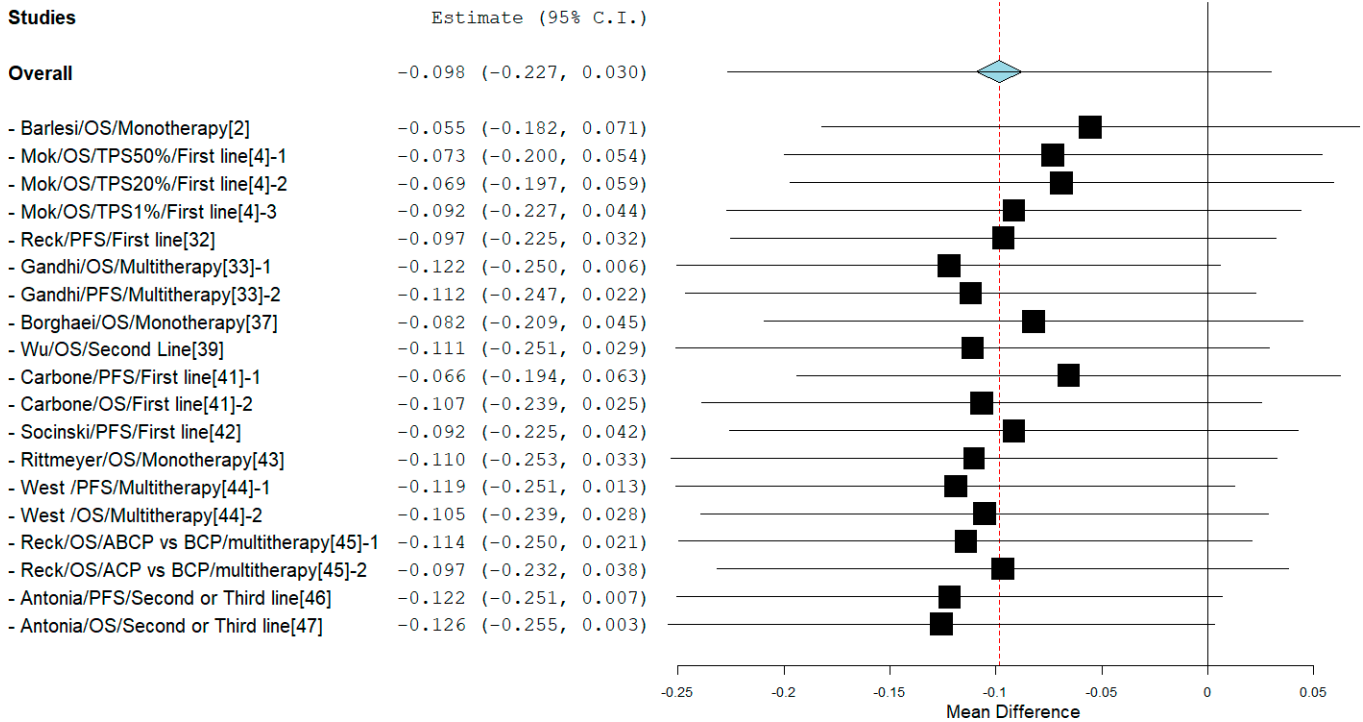

**Supplemental Figure s11. Response to treatment by anti-PD-1/PD-L1drugs between smoker and non-smokers using fixed effect leaveoneout model.**

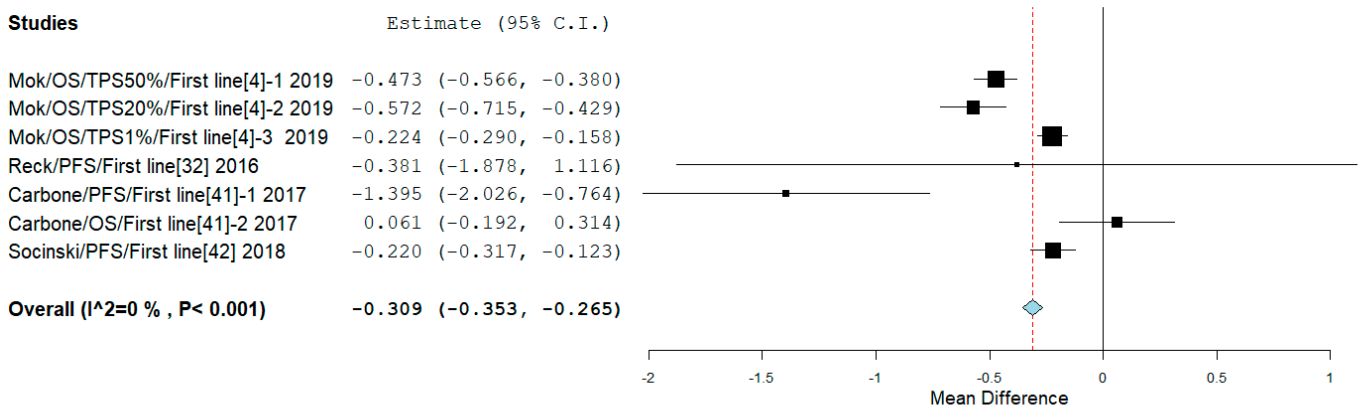

**Supplemental Figure s12. Response to treatment between smoker and non-smokers when treated as first line treatment by anti-PD-1/PD-L1 drugs using FE model.**

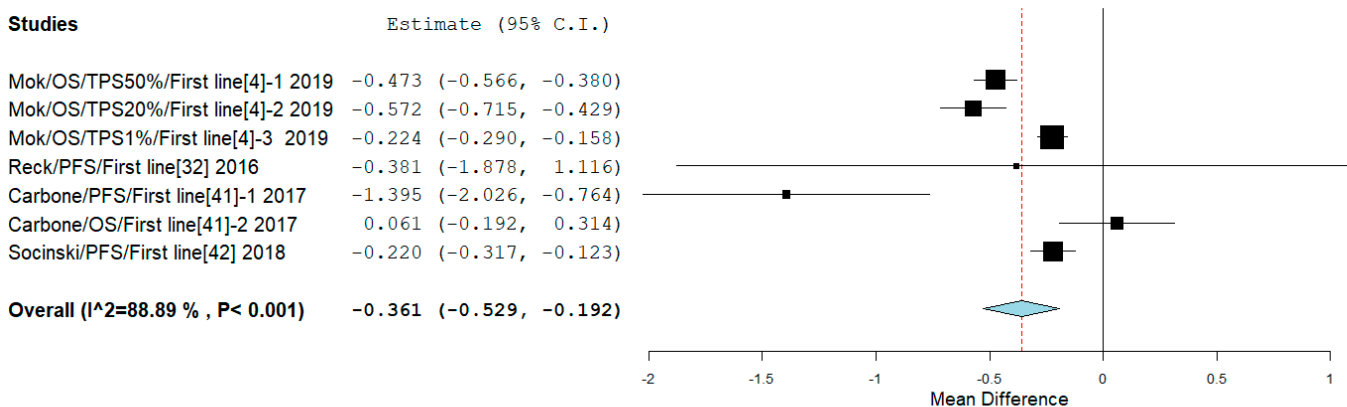

**Supplemental Figure s13. Response to treatment between smoker and non-smokers when treated as first line treatment by anti-PD-1/PD-L1 drugs using RE model.**

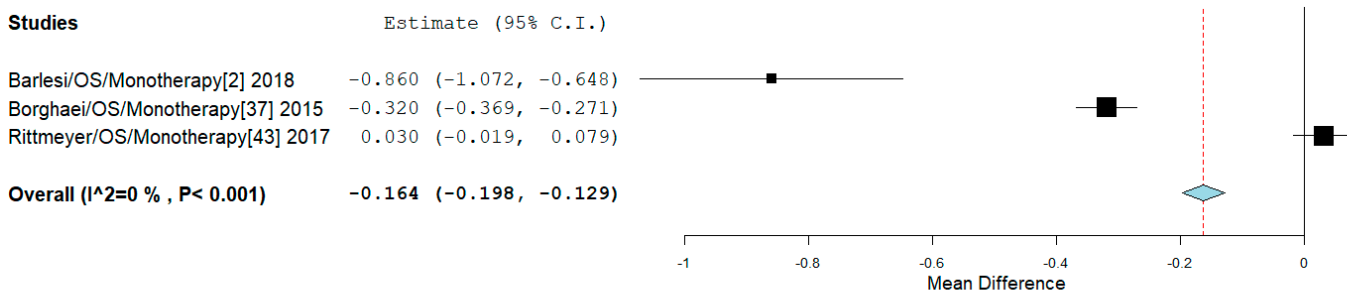

**Supplemental Figure s14. Response to treatment between smoker and non-smokers when treated as mon treatment by anti-PD-1/PD-L1 drugs using FE model.**

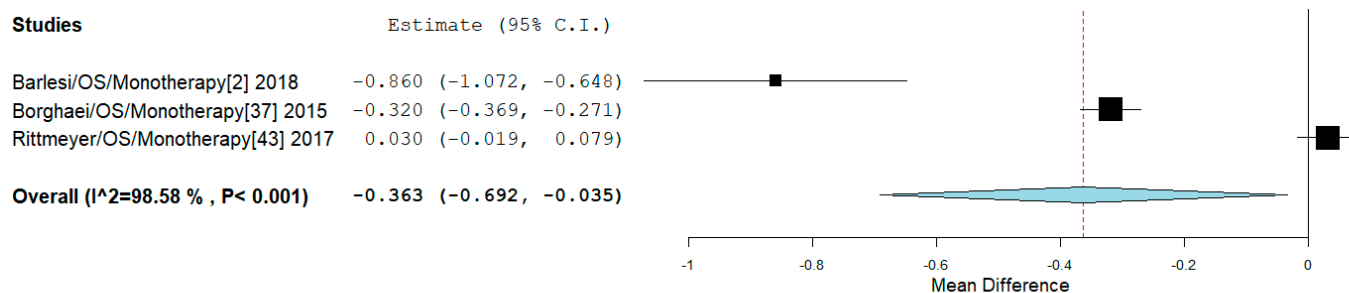

**Supplemental Figure s15. Response to treatment between smoker and non-smokers when treated as mono treatment by anti-PD-1/PD-L1drugs using RE model.**

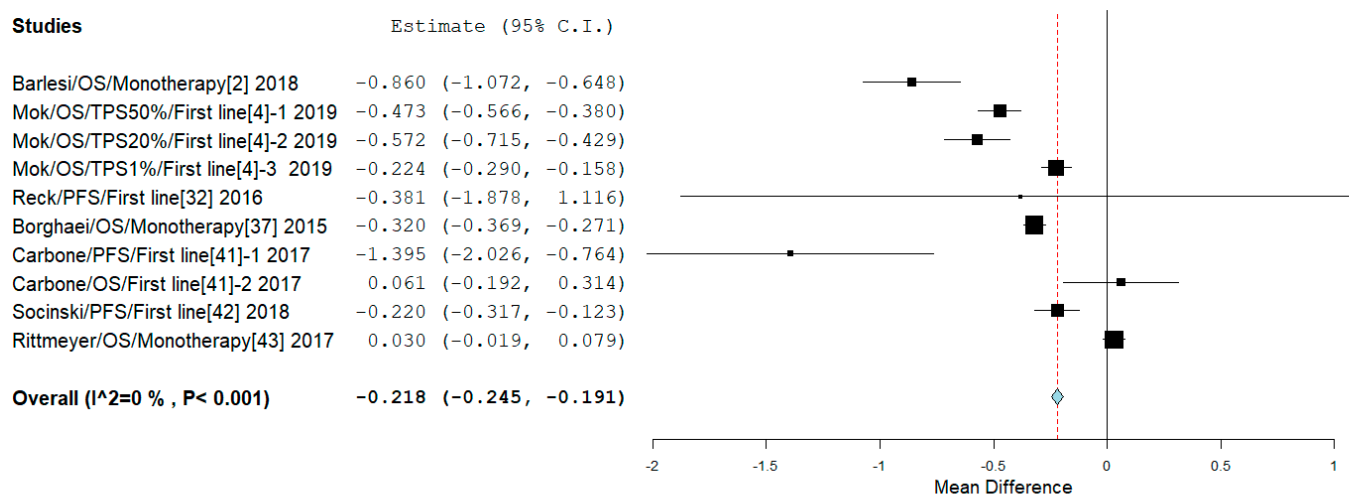

**Supplemental Figure s16. Response to treatment between smoker and non-smokers when treated as mono and first line treatment by anti-PD-1/PD-L1drugs using FE model.**

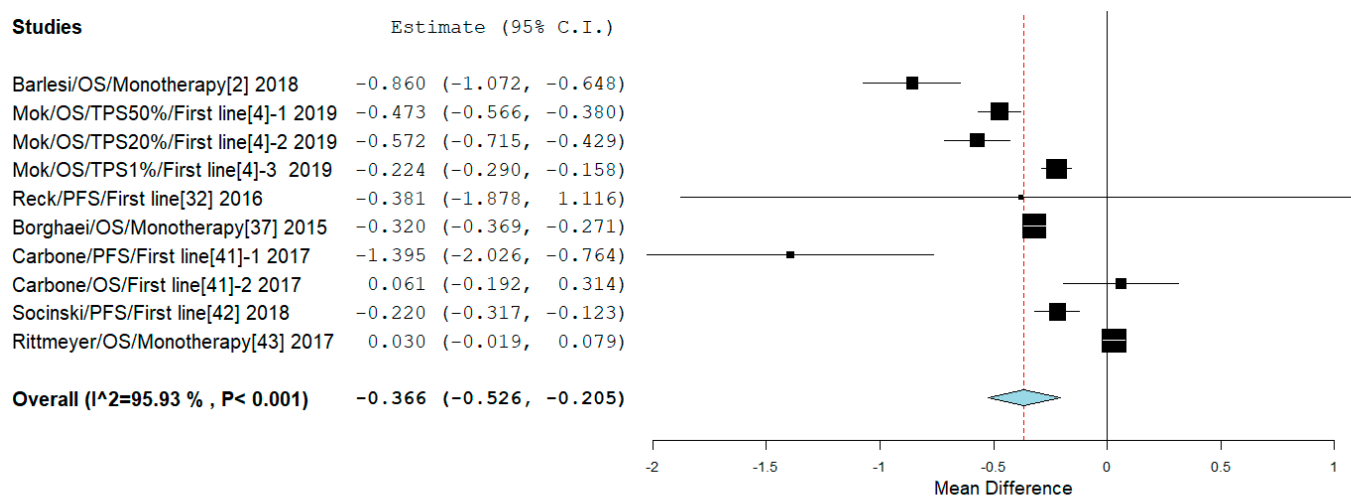

**Supplemental Figure s17. Response to treatment between smoker and non-smokers when treated as second line treatment by anti-PD-1/PD-L1drugs using FE model.**

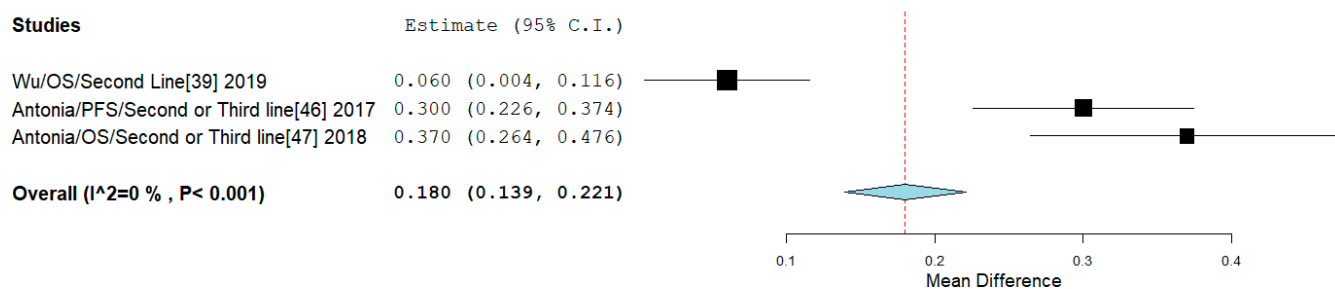

**Supplemental Figure s18. Response to treatment between smoker and non-smokers when treated as second line treatment by anti-PD-1/PD-L1drugs using RE model.**

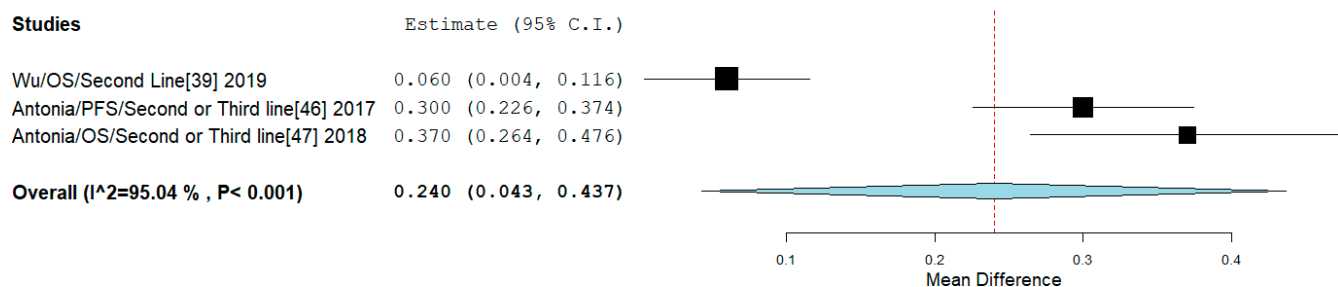

**Supplemental Figure s19. Response to treatment between smoker and non-smokers when treated as mono and first line treatment by anti-PD-1/PD-L1 drugs using RE model.**

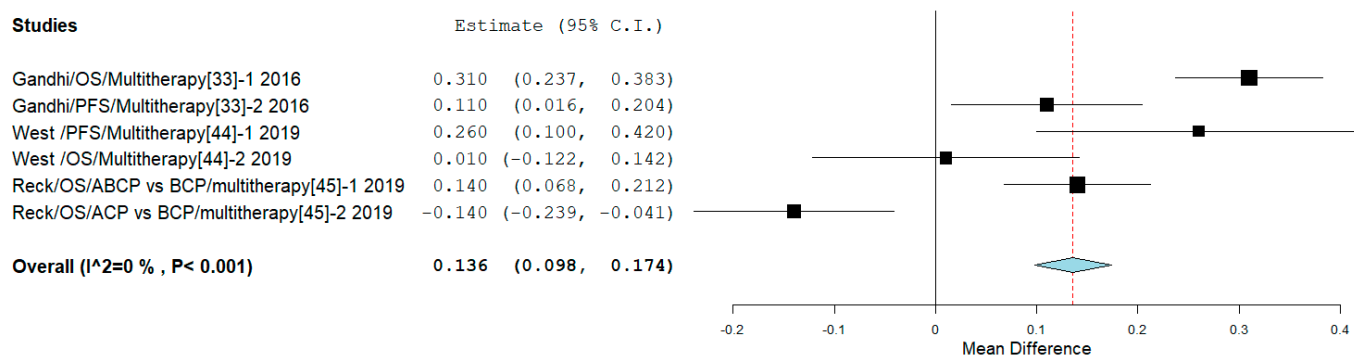

**Supplemental Figure s20. Response to treatment between smoker and non-smokers when treated with multiple drugs, anti-PD-1/PD-L1 and other drugs, using FE model.**

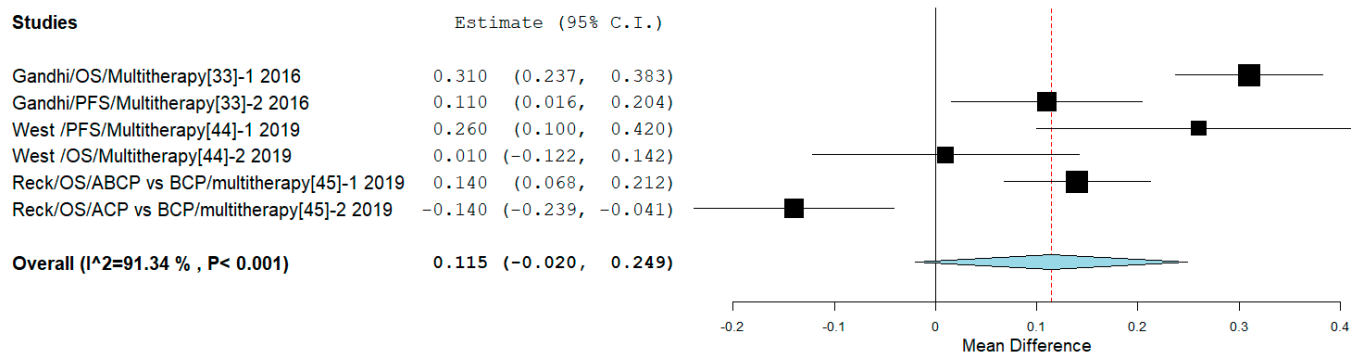

**Supplemental Figure s21. Response to treatment between smoker and non-smokers when treated with multiple drugs, anti-PD-1/PD-L1 and other drugs, using RE model.**

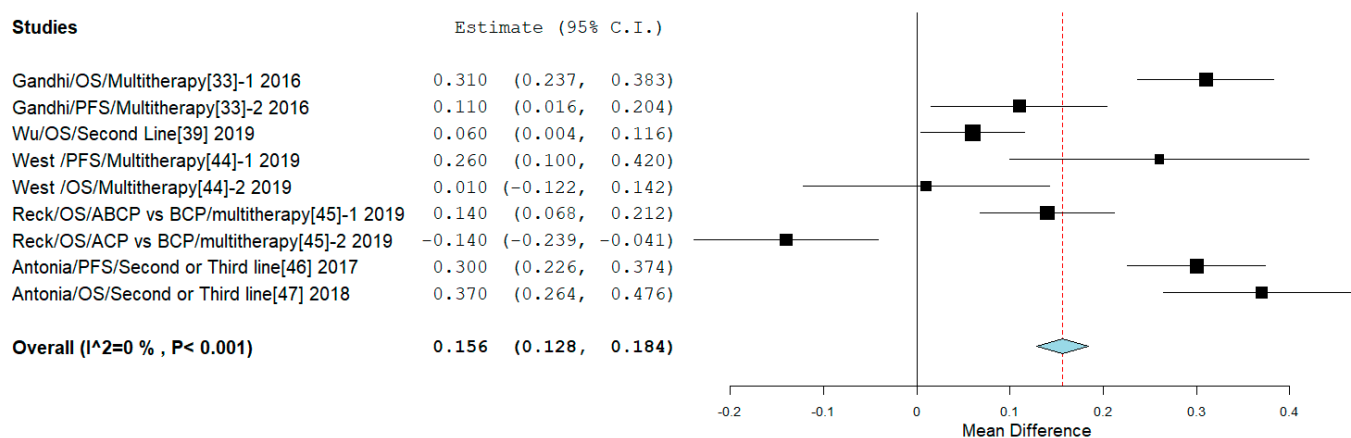

**Supplemental Figure s22. Response to treatment between smoker and non-smokers when treated as second line and with multiple drugs, including anti-PD-1/PD-L1 and other drugs, using FE model.**

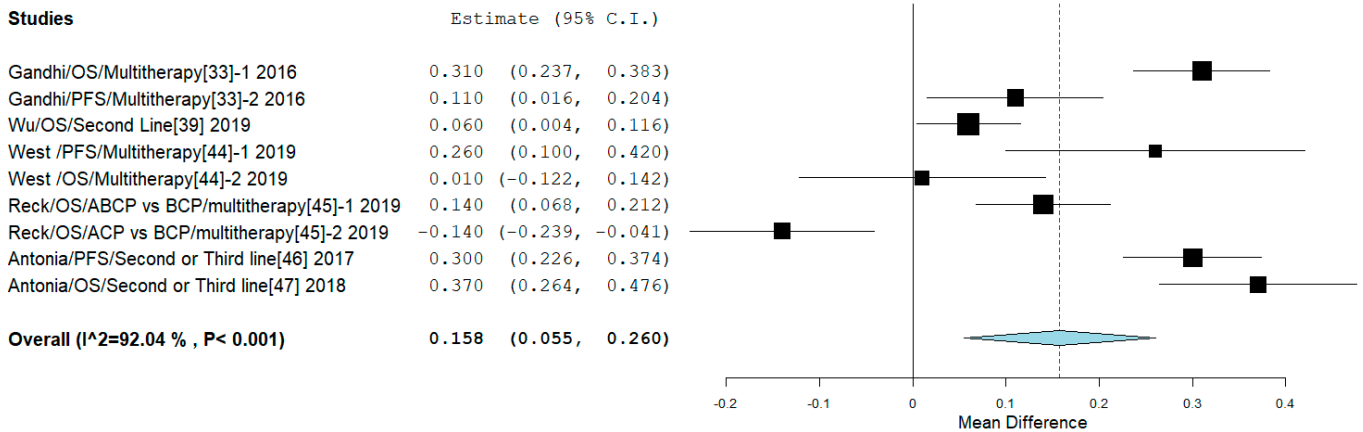

**Supplemental Figure s23. Response to treatment between smoker and non-smokers when treated as second lien and with multiple drugs, including anti-PD-1/PD-L1 and other drugs, using RE model.**

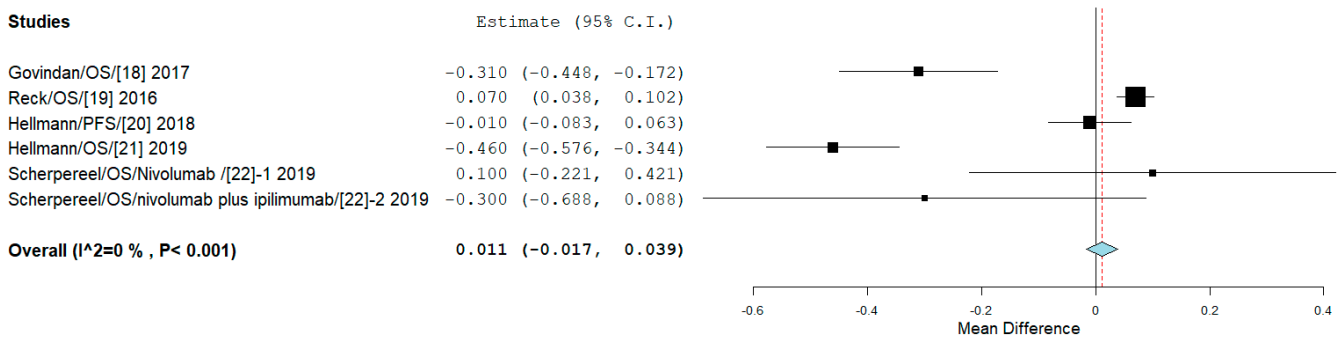

**Supplemental Figure s24. Response to treatment between smoker and non-smokers when treated with anti-CTLA-4 drug using FE model.**



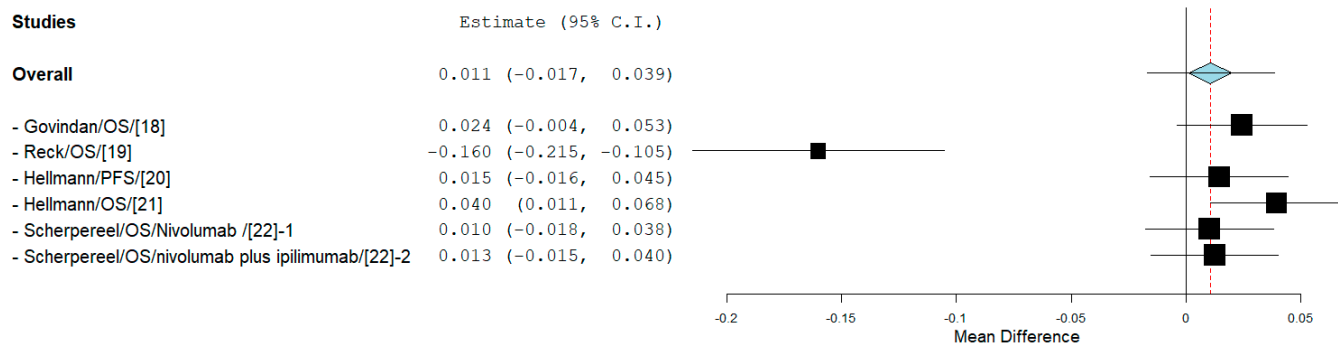

**Supplemental Figure s25. Response to treatment between smoker and non-smokers when treated anti-CTLA-4 drug using FE leaveoneout model.**

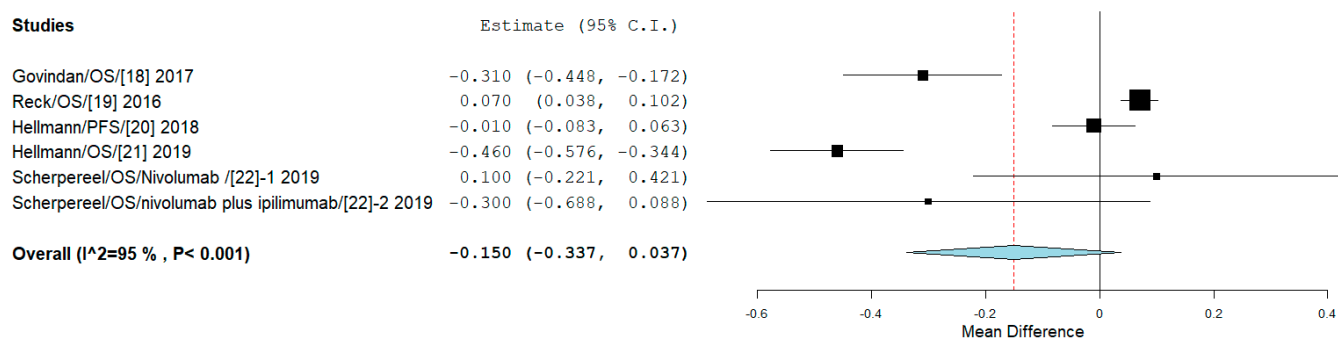

**Supplemental Figure s26. Response to treatment between smoker and non-smokers when treated with anti-CTLA-4 drug using RE model.**

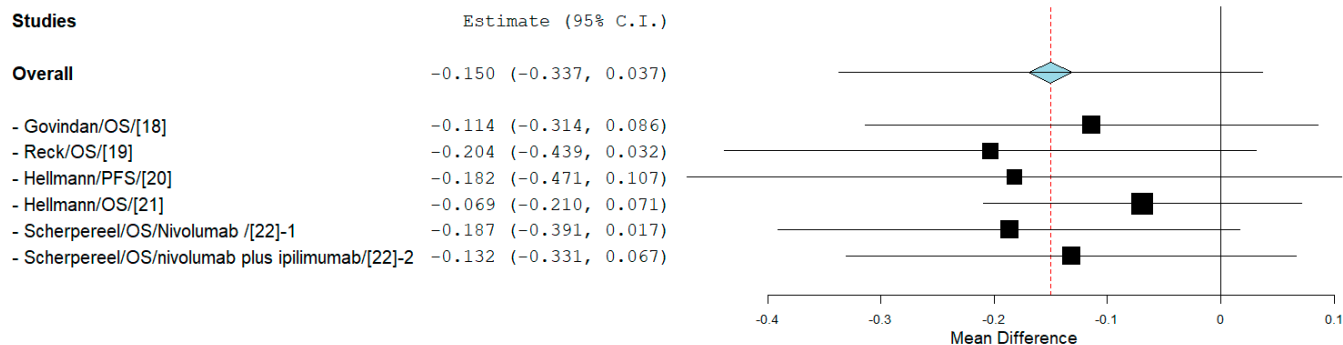

**Supplemental Figure s27. Response to treatment between smoker and non-smokers when treated using FE leaveoneout model.**

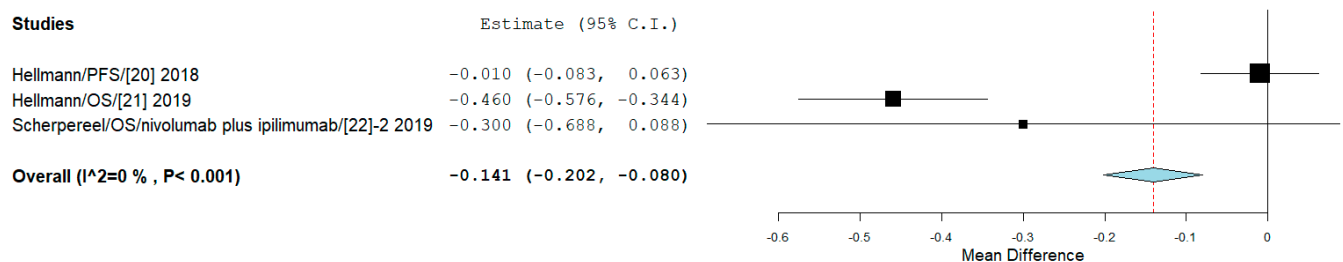

**Supplemental Figure s28. Response to treatment between smoker and non-smokers when treated with Nivolumab plus ipilimumab using FE model.**

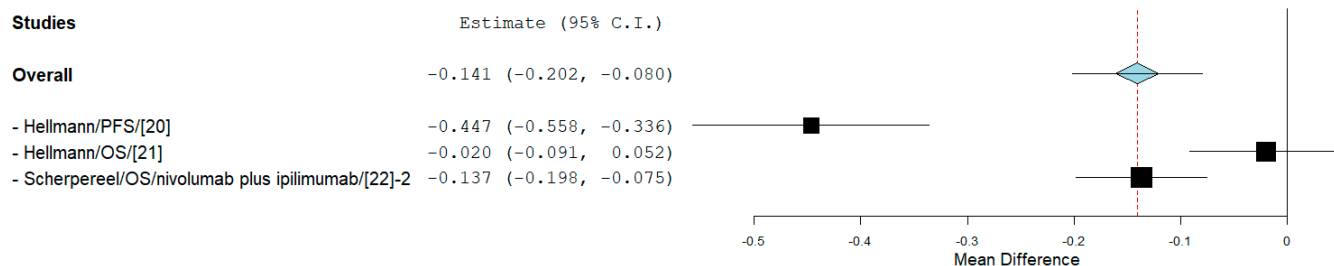

**Supplemental Figure s29. Response to treatment between smoker and non-smokers when treated with Nivolumab plus ipilimumab using FE leaveoneout model.**

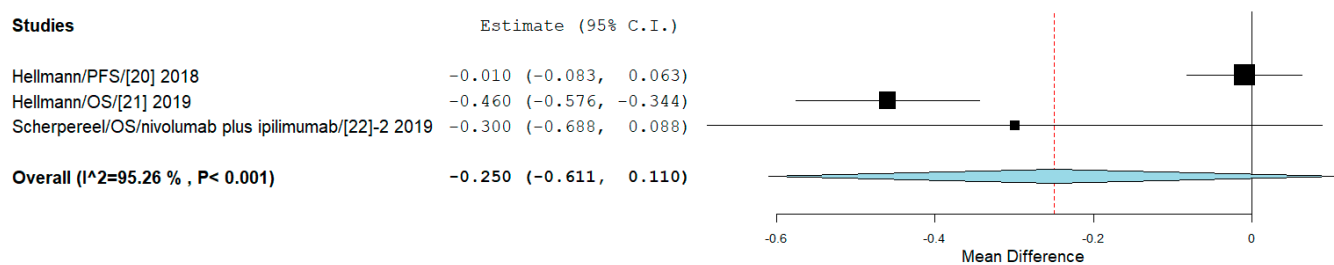

**Supplemental Figure s30. Response to treatment between smoker and non-smokers when treated with Nivolumab plus ipilimumab using RE model.**

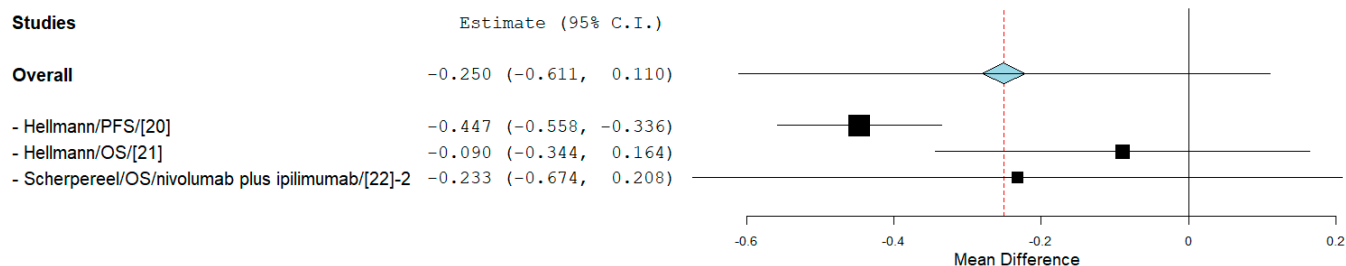

**Supplemental Figure s31. Response to treatment between smoker and non-smokers when treated with Nivolumab plus ipilimumab using RE leaveoneout model.**

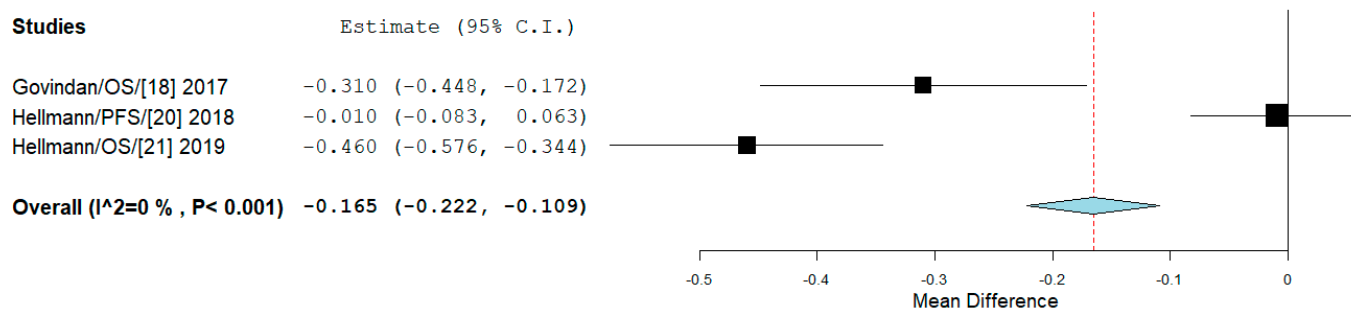

**Supplemental Figure s32. Response to treatment between smoker and non-smokers when treated with anti-CTLA-4 drug using FE model in NSCLC patients.**

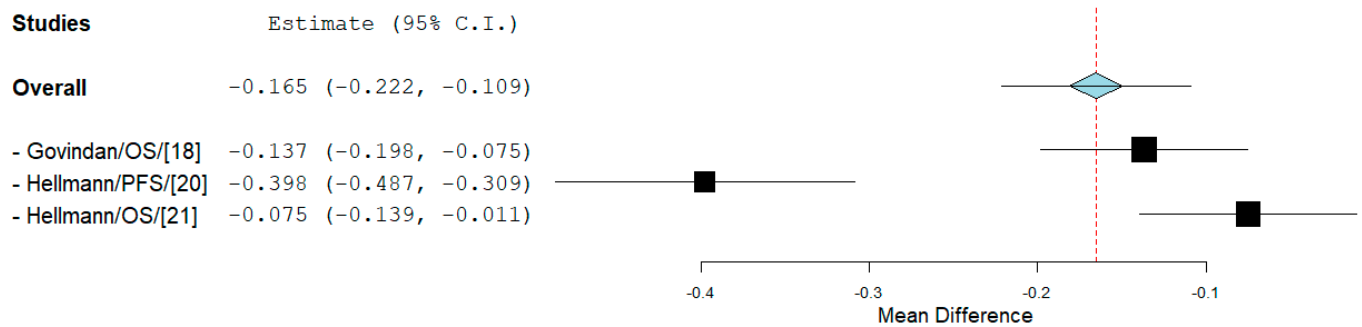

**Supplemental Figure s33. Response to treatment between smoker and non-smokers when treated with anti-CTLA-4 drug using RE leaveoneout model in NSCLC patients.**

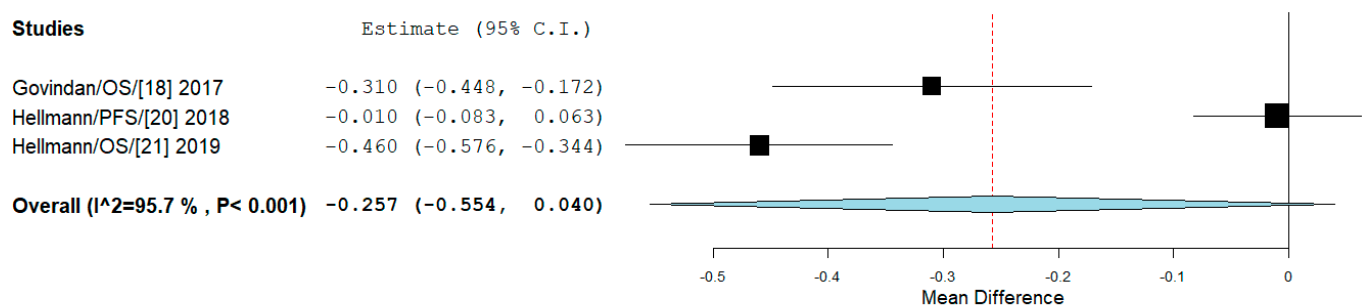

**Supplemental Figure s34. Response to treatment between smoker and non-smokers when treated with anti-CTLA-4 drug using RE leaveoneout model in NSCLC patients.**

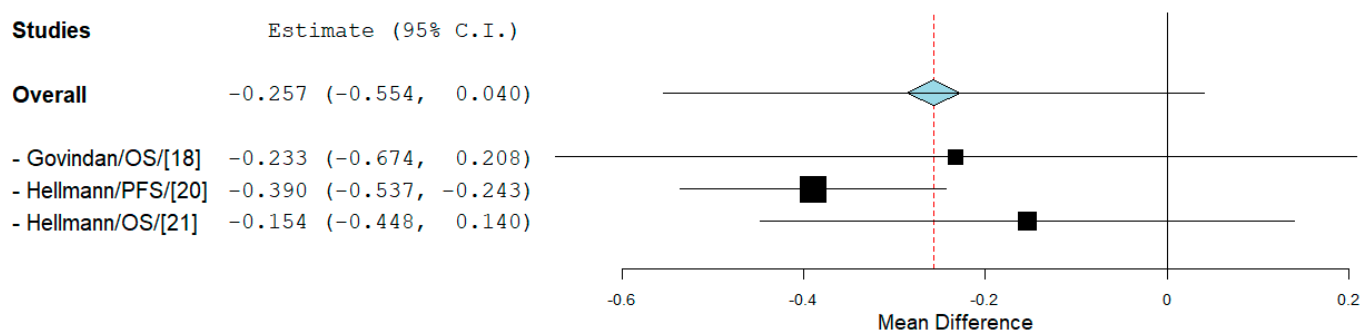

**Supplemental Figure s35. Response to treatment between smoker and non-smokers when treated anti-CTLA-4 drug using RE leaveoneout model in NSCLC patients.**

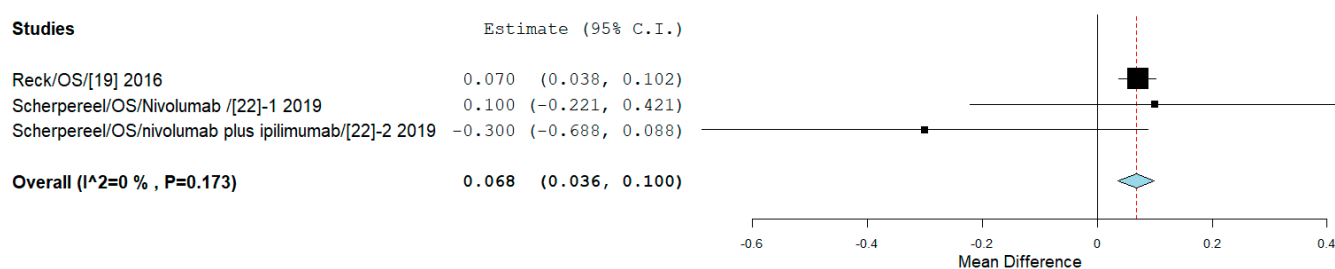

**Supplemental Figure s36. Response to treatment between smoker and non-smokers when treated with anti-CTLA-4 drug using FE model in non-NSCLC patients.**

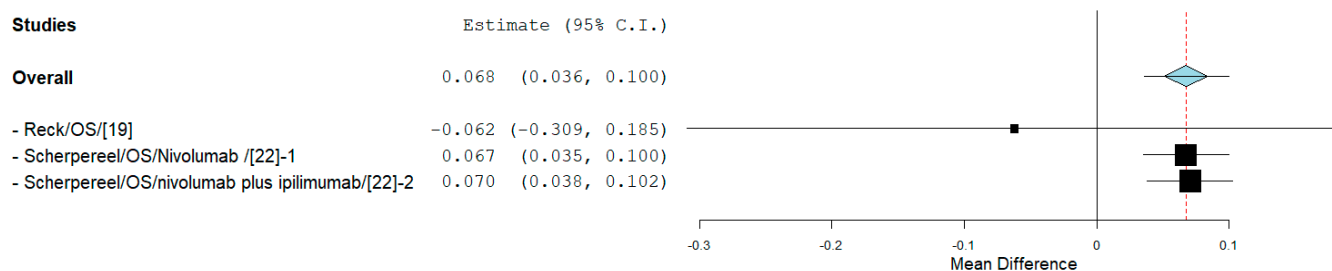

**Supplemental Figure s37. Response to treatment between smoker and non-smokers when treated with anti-CTLA-4 drug using FE leaveoneout model in non-NSCLC patients.**

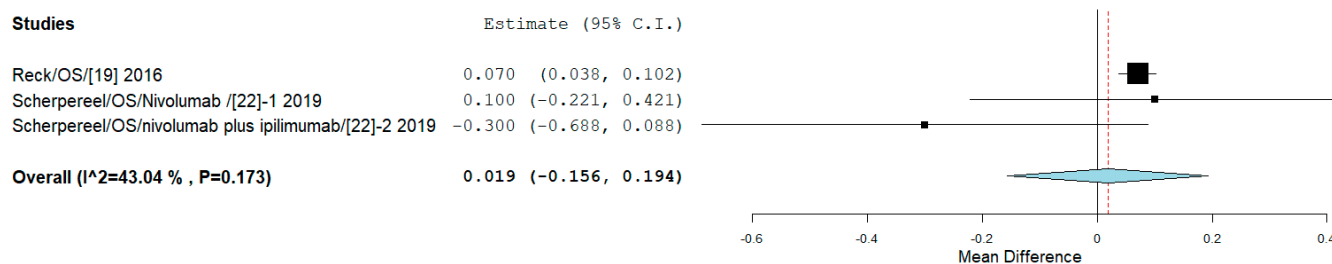

**Supplemental Figure s38. Response to treatment between smoker and non-smokers when treated with anti-CTLA-4 drug using RE model in non-NSCLC patients.**

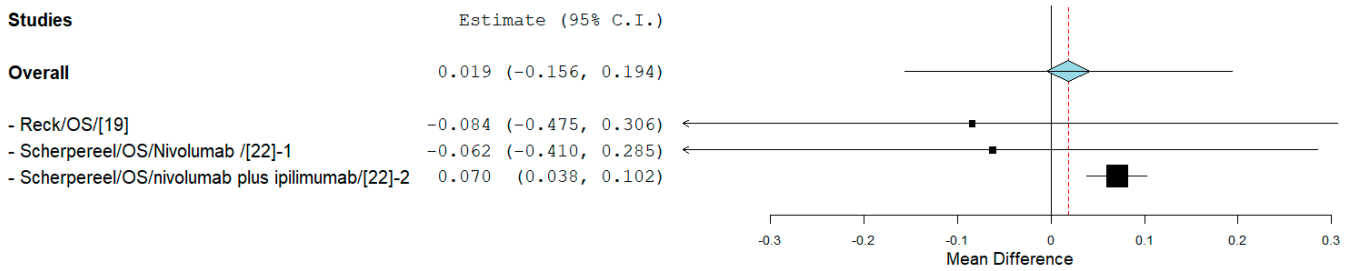

**Supplemental Figure s39. Response to treatment between smoker and non-smokers when treated with anti-CTLA-4 drug using RE leaveoneout model in non-NSCLC patients.**

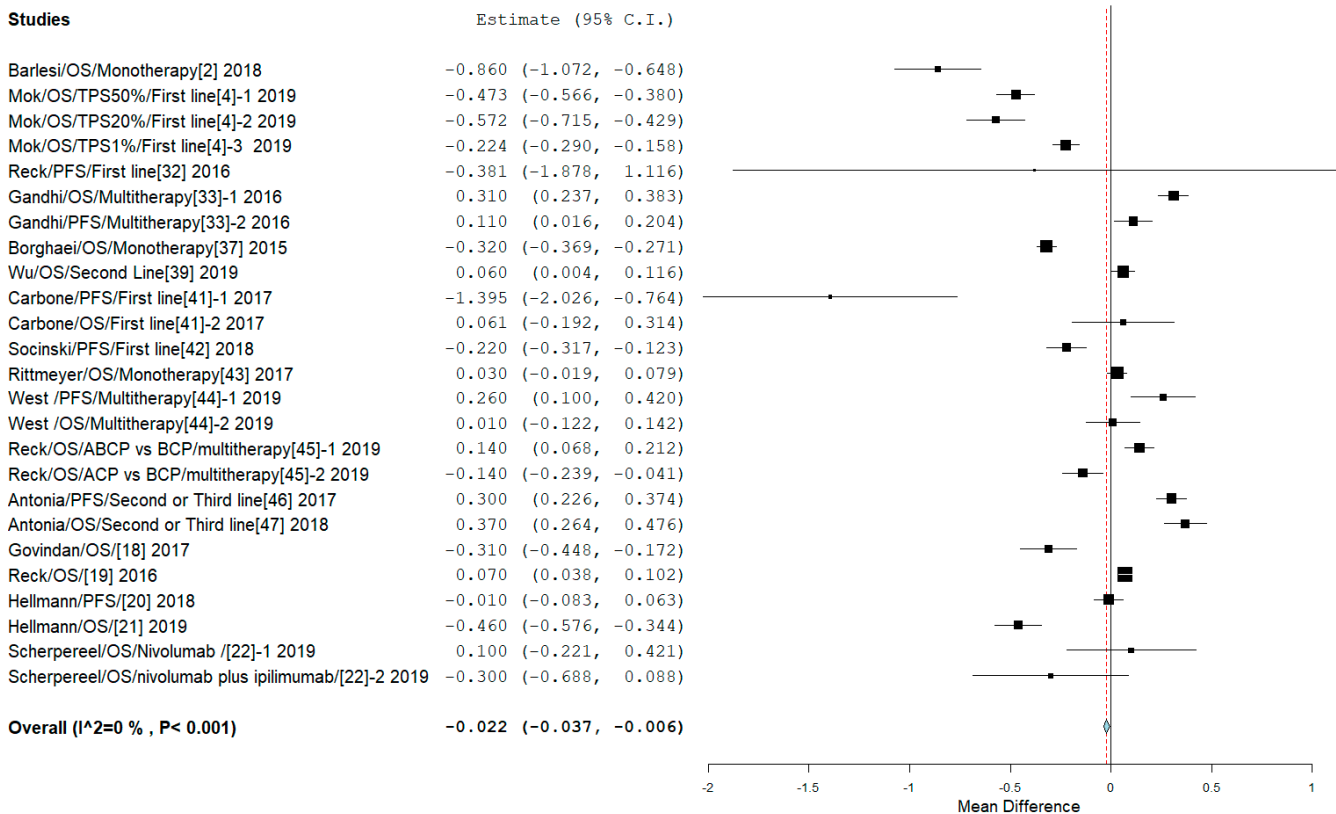



**Supplemental Figure s40. Response to treatment between smoker and non-smokers when treated with anti-PD-1 and anti-CTLA-4 drugs using FE model in cancer patients.**

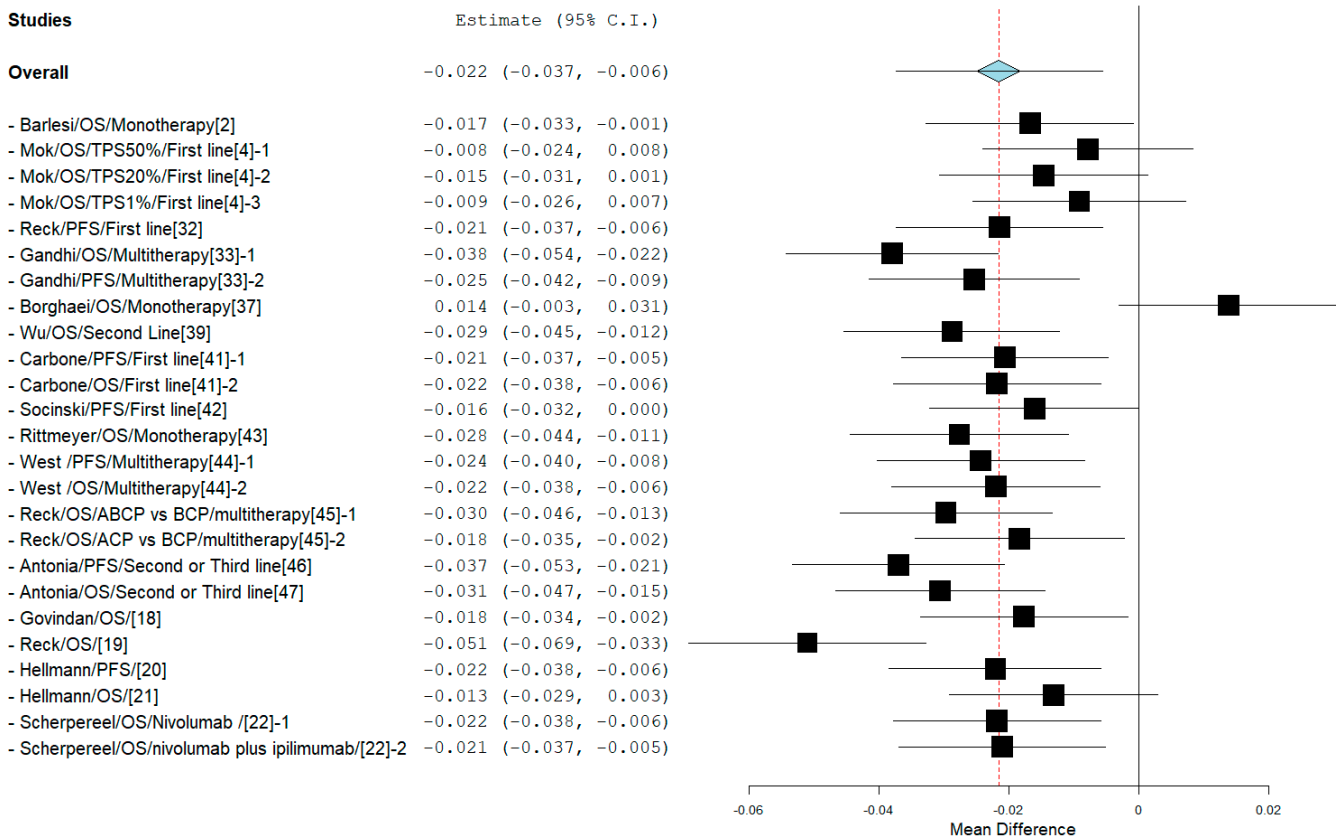

**Supplemental Figure s41. Response to treatment between smoker and non-smokers when treated with anti-PD-1 and anti-CTLA-4 drugs using FE leaveoneout model in cancer patients.**

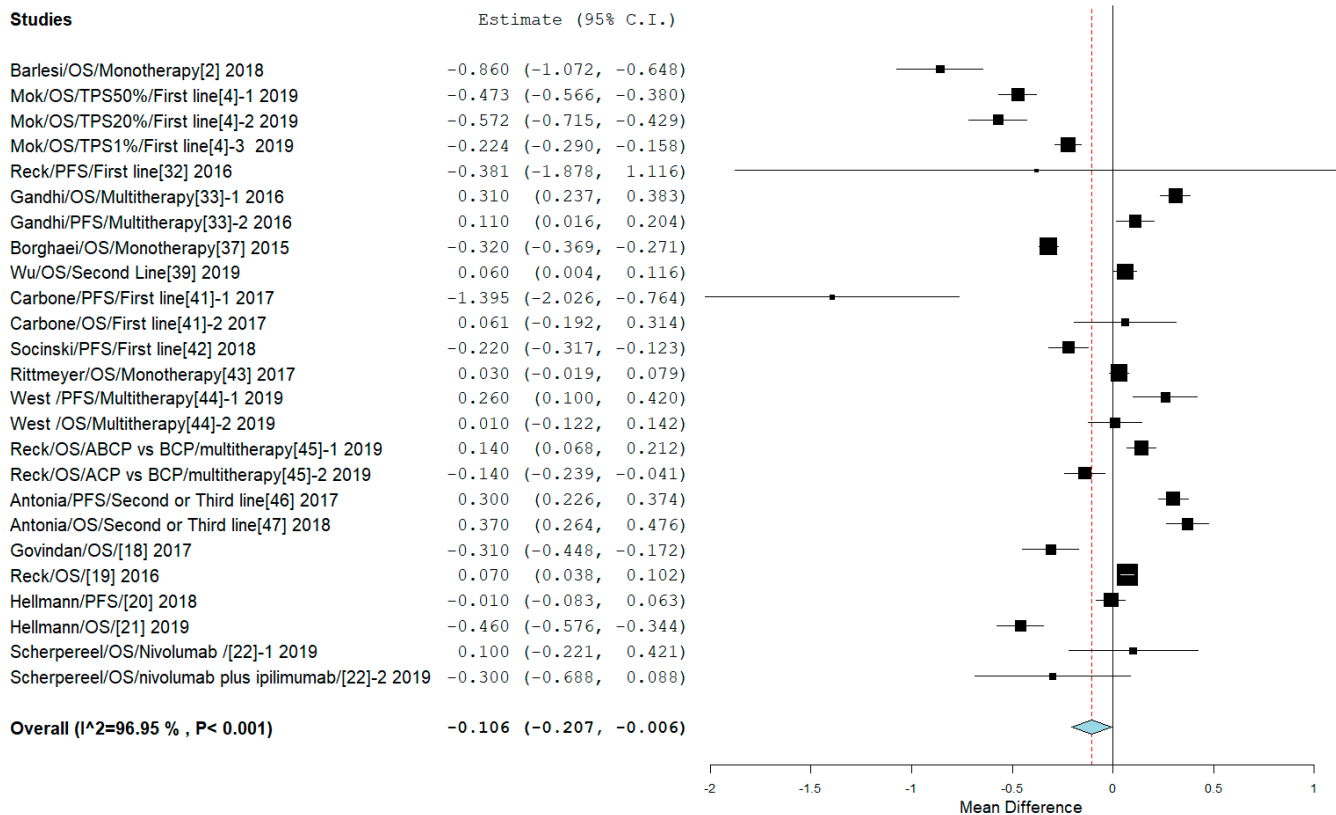

**Supplemental Figure s42. Response to treatment between smoker and non-smokers when treated with anti-PD-1 and anti-CTLA-4 drugs using RE model in cancer patients.**

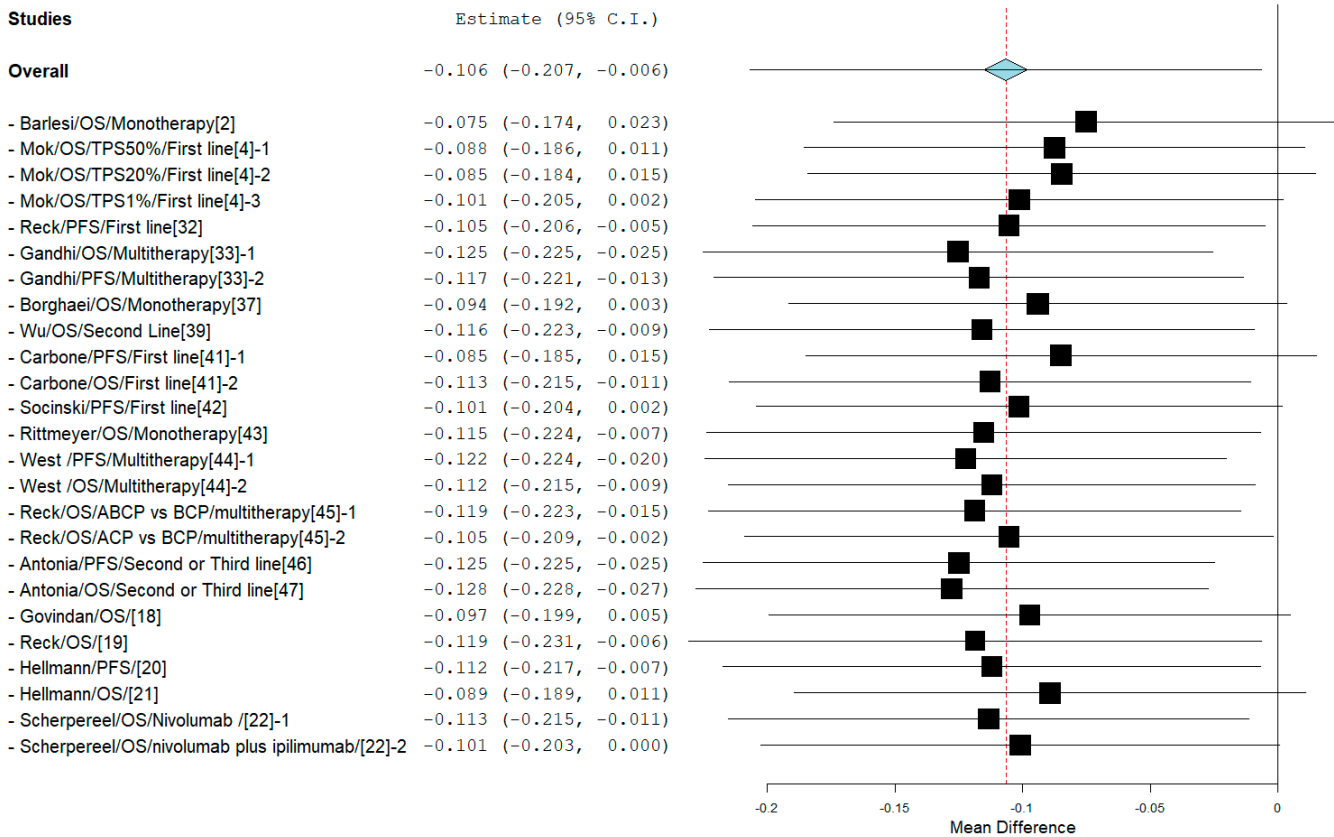

**Supplemental Figure s43. Response to treatment between smoker and non-smokers when treated with anti-PD-1 and anti-CTLA-4 drugs using RE leaveoneout model in cancer patients.**

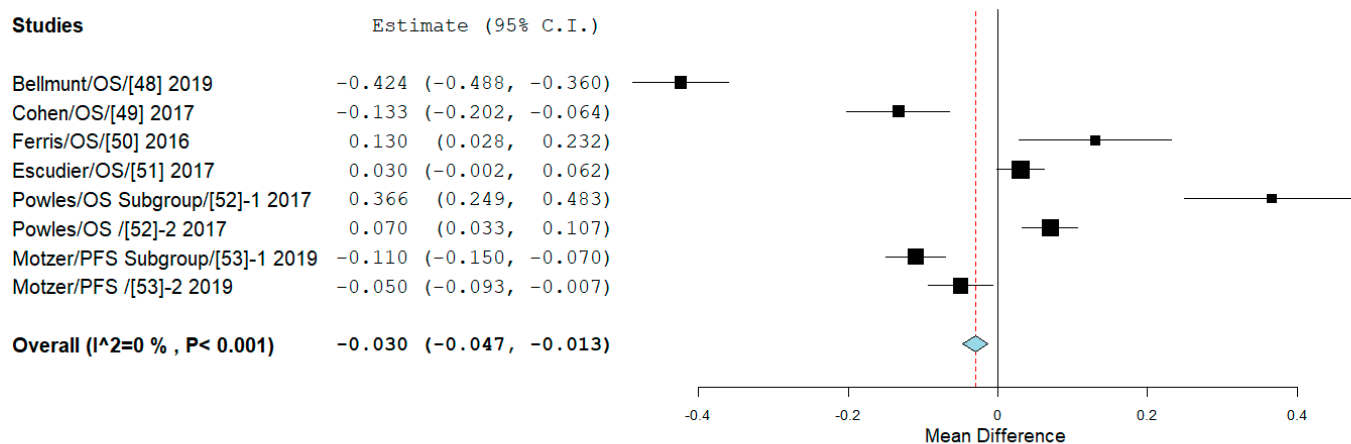

**Supplemental Figure s44. Response to treatment between smoker and non-smokers when treated with anti-PD- using FE I model in non-NSCLC patients.**

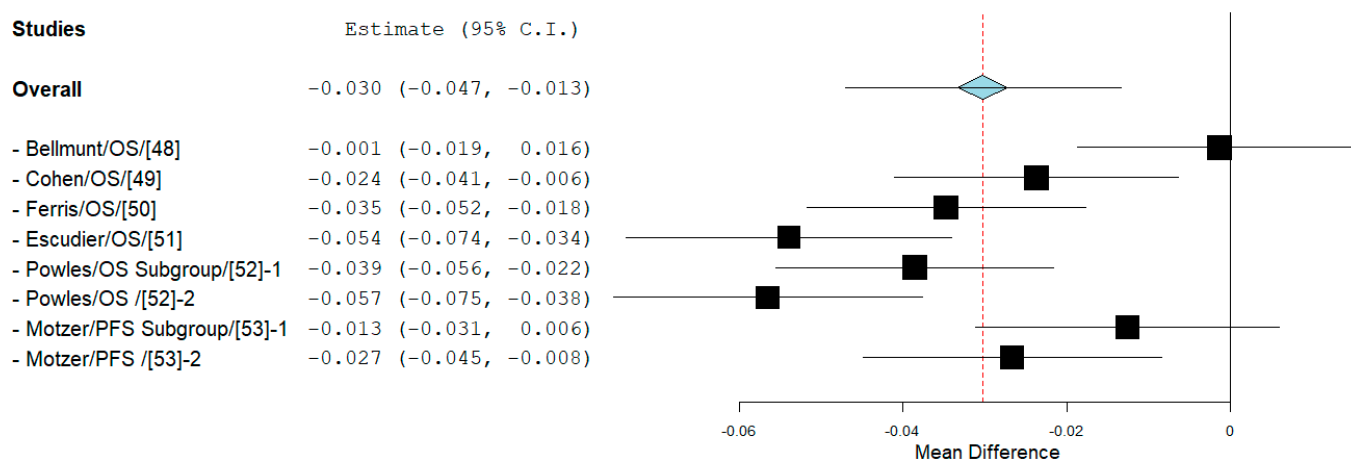

**Supplemental Figure s45. Response to treatment between smoker and non-smokers when treated with anti-PD-1 drugs**

using FE leaveoneout model in non-NSCLC patients.

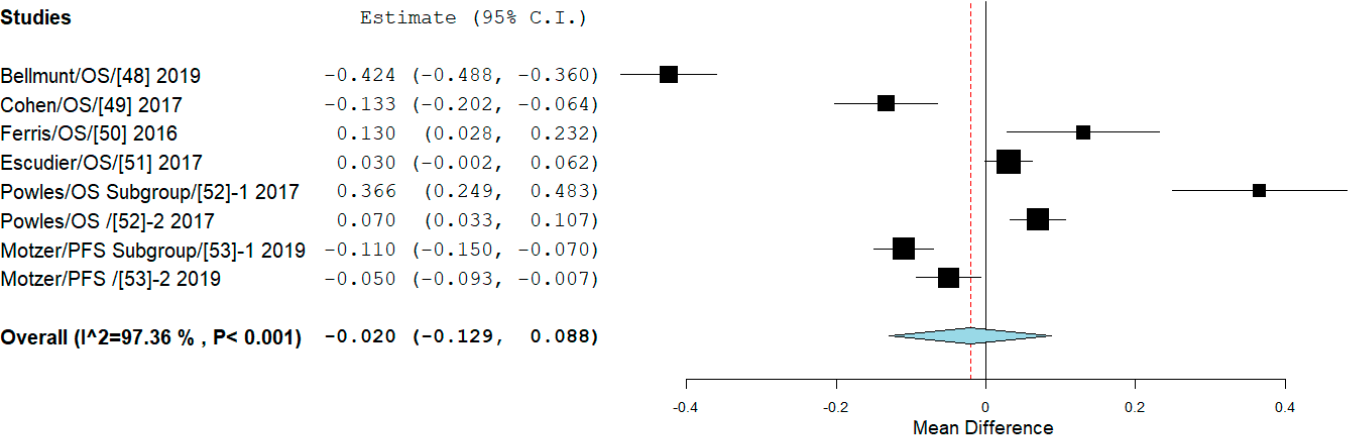

Supplemental Figure s46. Response to treatment between smoker and non-smokers when treated with anti-PD-1 drugs using RE model in non-NSCLC patients.

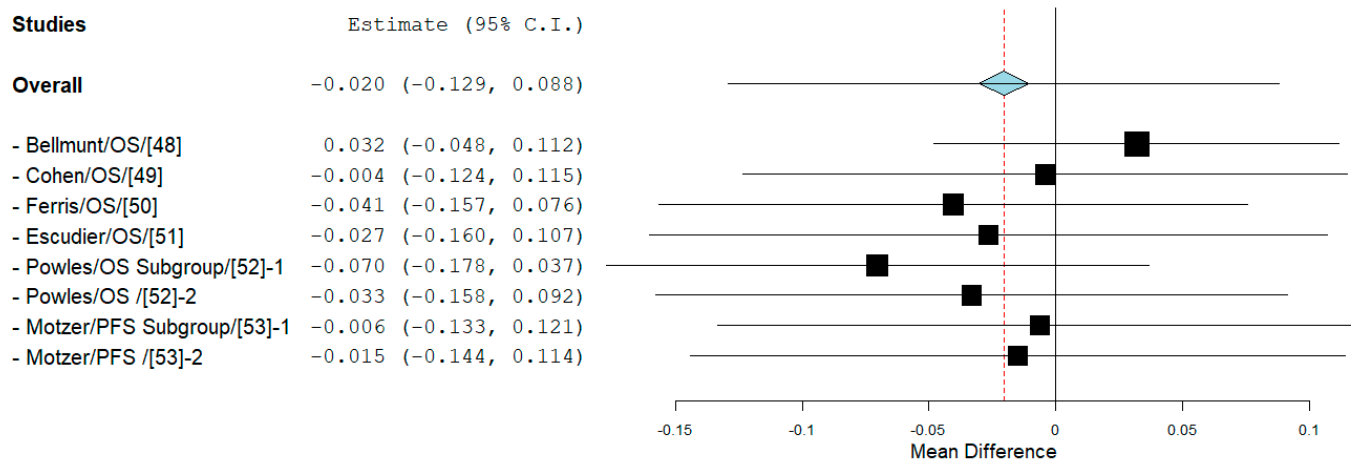

**Supplemental Figure s47. Response to treatment between smoker and non-smokers when treated with anti-PD-1 drugs using RE leaveoneout model in non-NSCLC patients.**

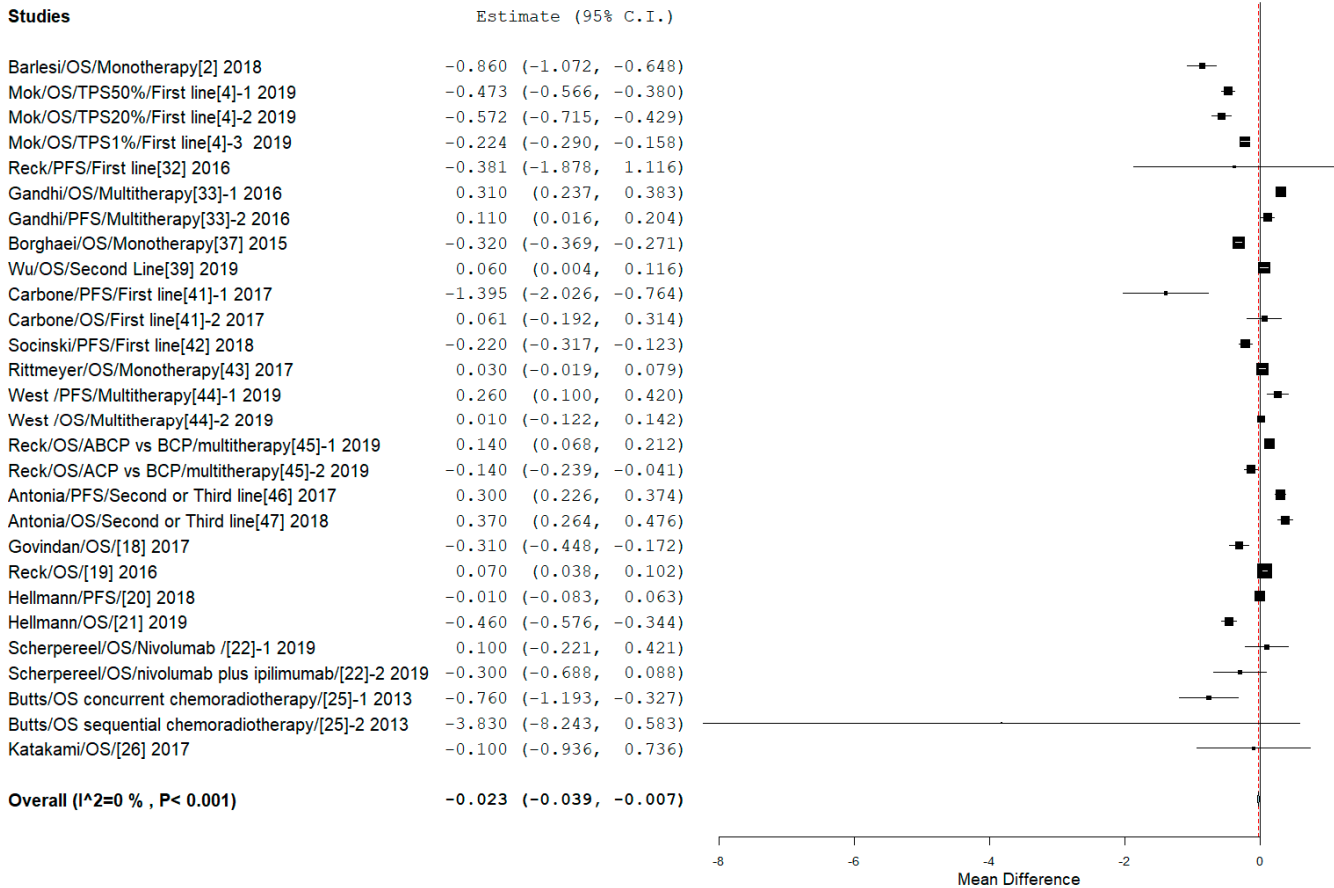

**Supplemental Figure s48. Response to treatment between smoker and non-smokers when treated with anti-PD-1, anti-CTLA-4, and anti-MUC1 drugs using FE model in cancer patients.**

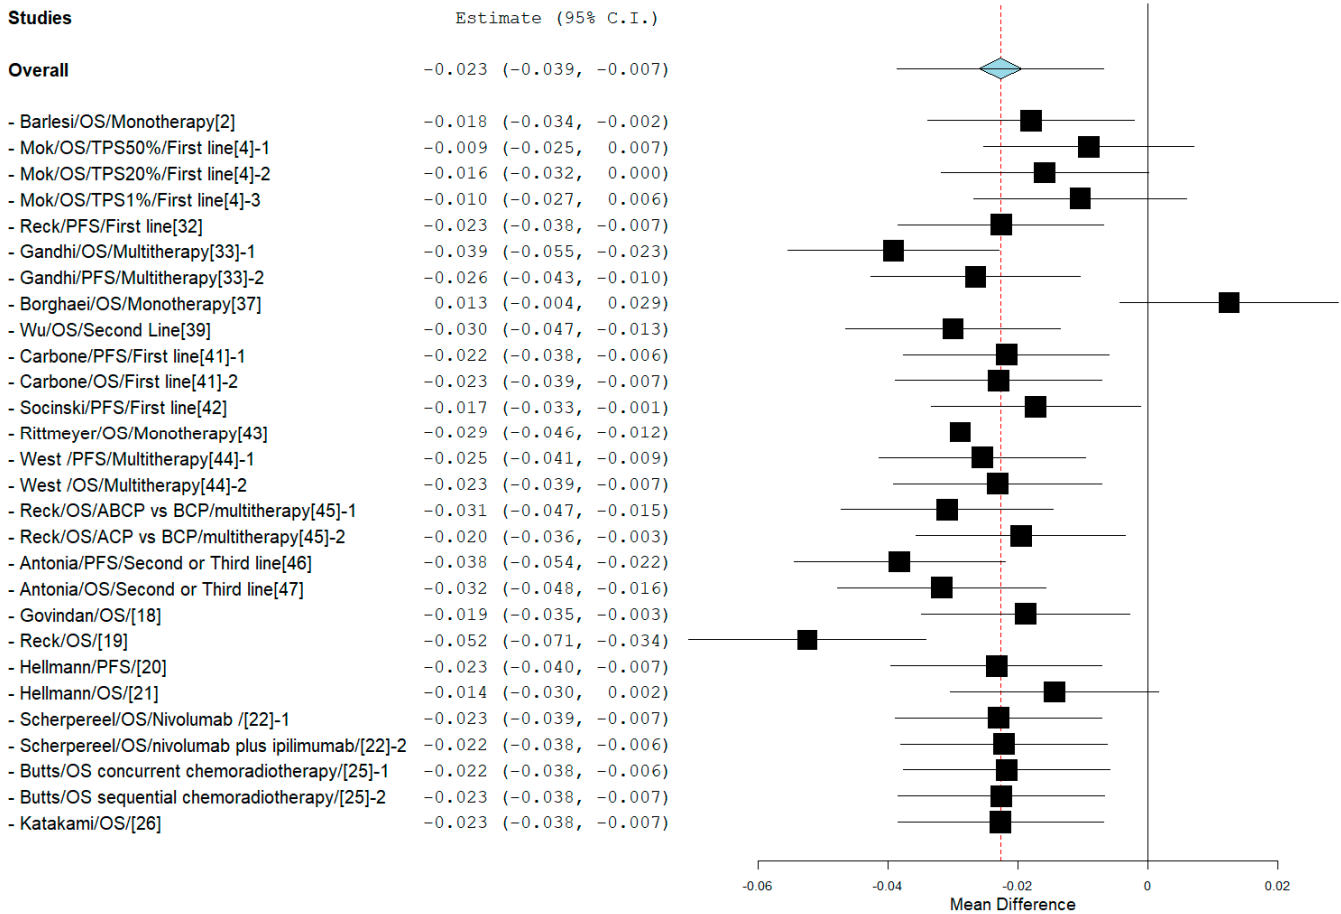

**Supplemental Figure s49. Response to treatment between smoker and non-smokers when treated with anti-PD-1, anti-CTLA-4, and anti-MUC1 drugs using FE leaveoneout model in cancer patients.**



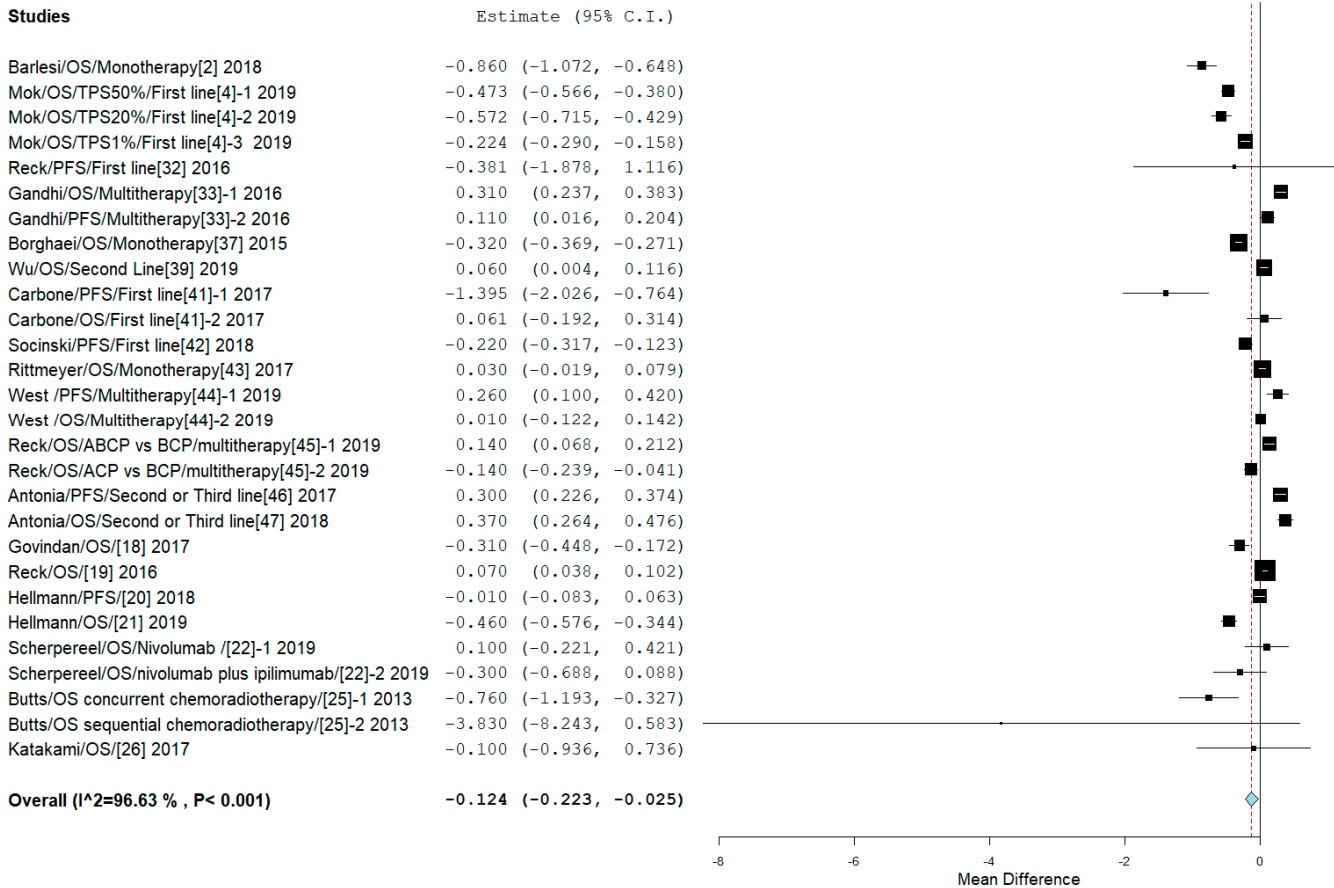

**Supplemental Figure s50. Response to treatment between smoker and non-smokers when treated with anti-PD-1 and anti-CTLA-4 drugs using RE model in cancer patients.**

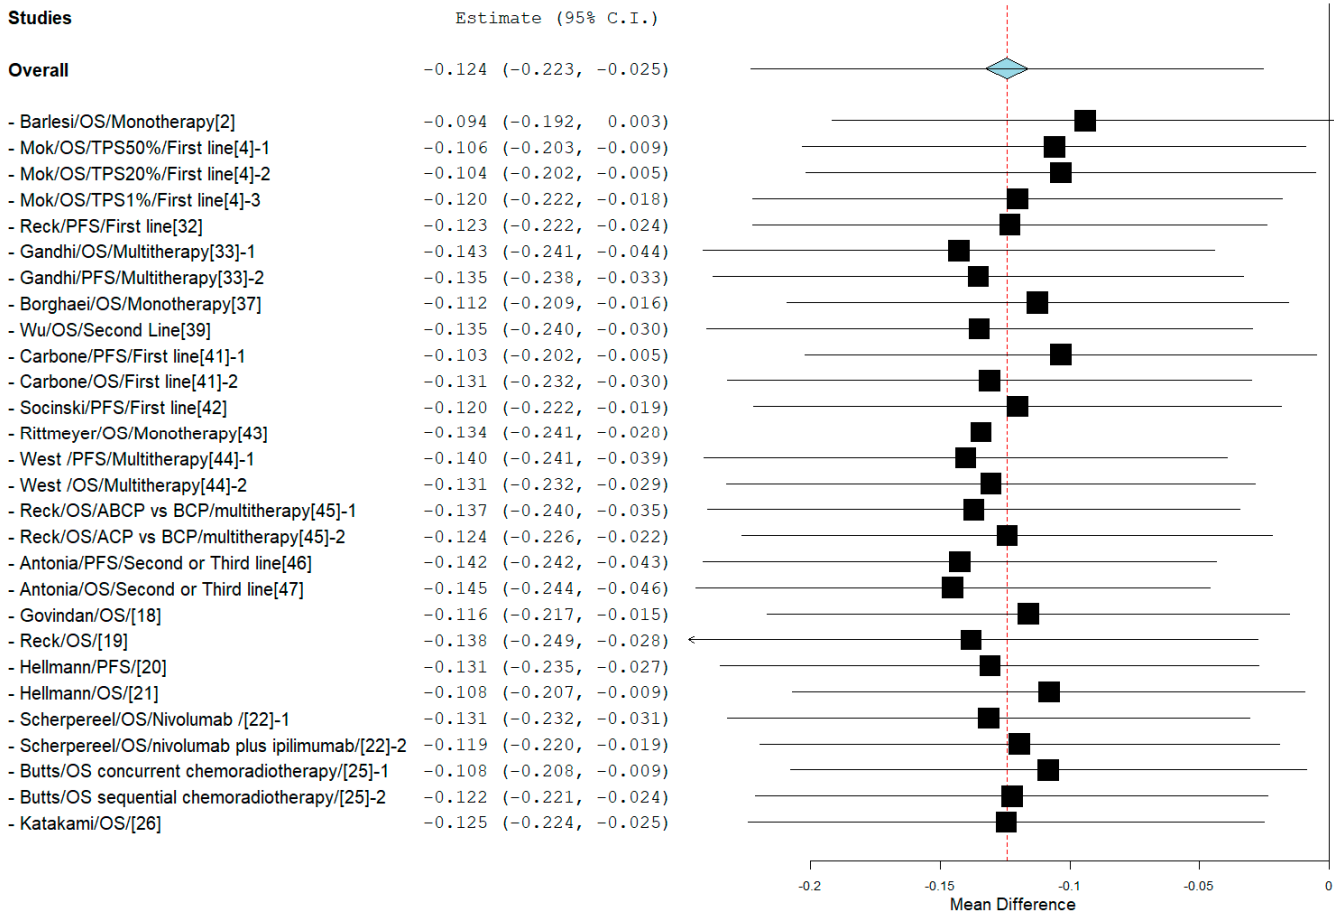

**Supplemental Figure s51. Response to treatment between smoker and non-smokers when treated with anti-PD-1, anti-CTLA-4, and anti-MUC1 drugs using RE leaveoneout model in cancer patients.**

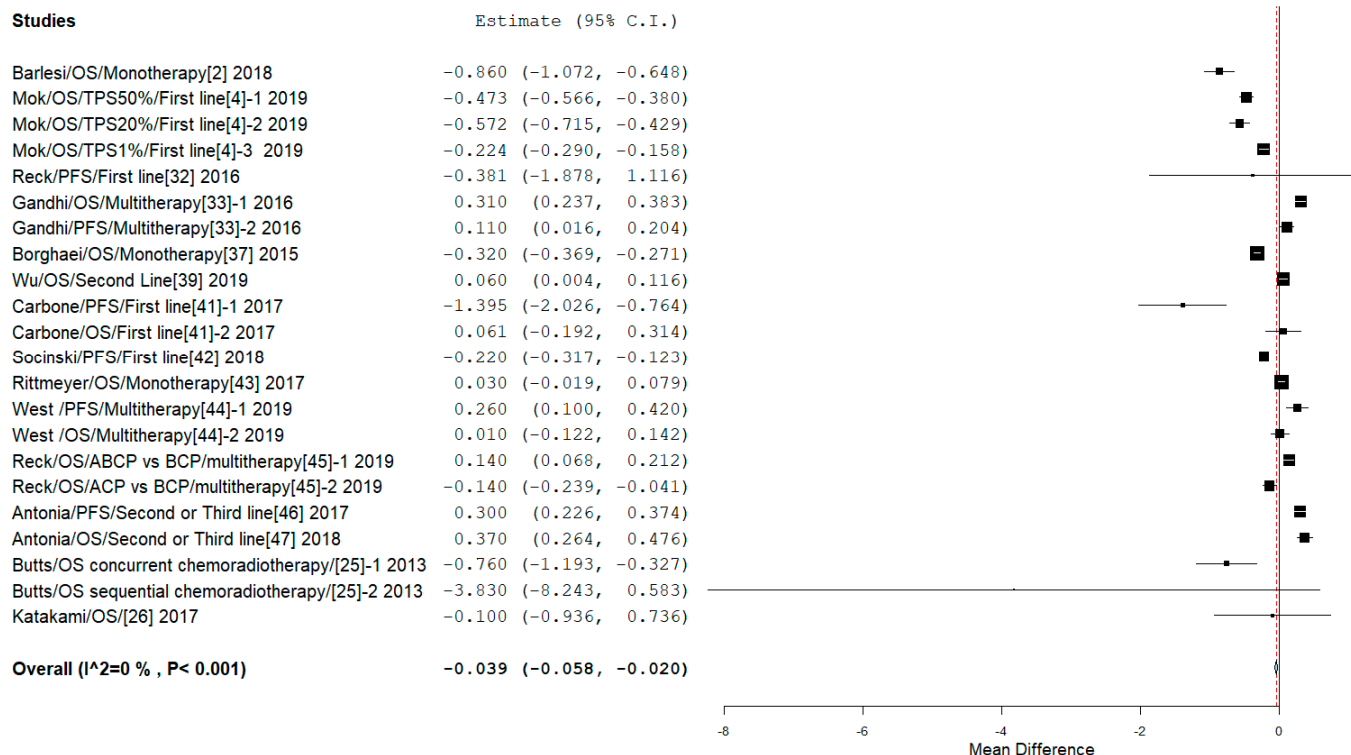

**Supplemental Figure s52. Response to treatment between smoker and non-smokers when treated with anti-PD-1 and anti-MUC1 drugs using FE model in cancer patients.**

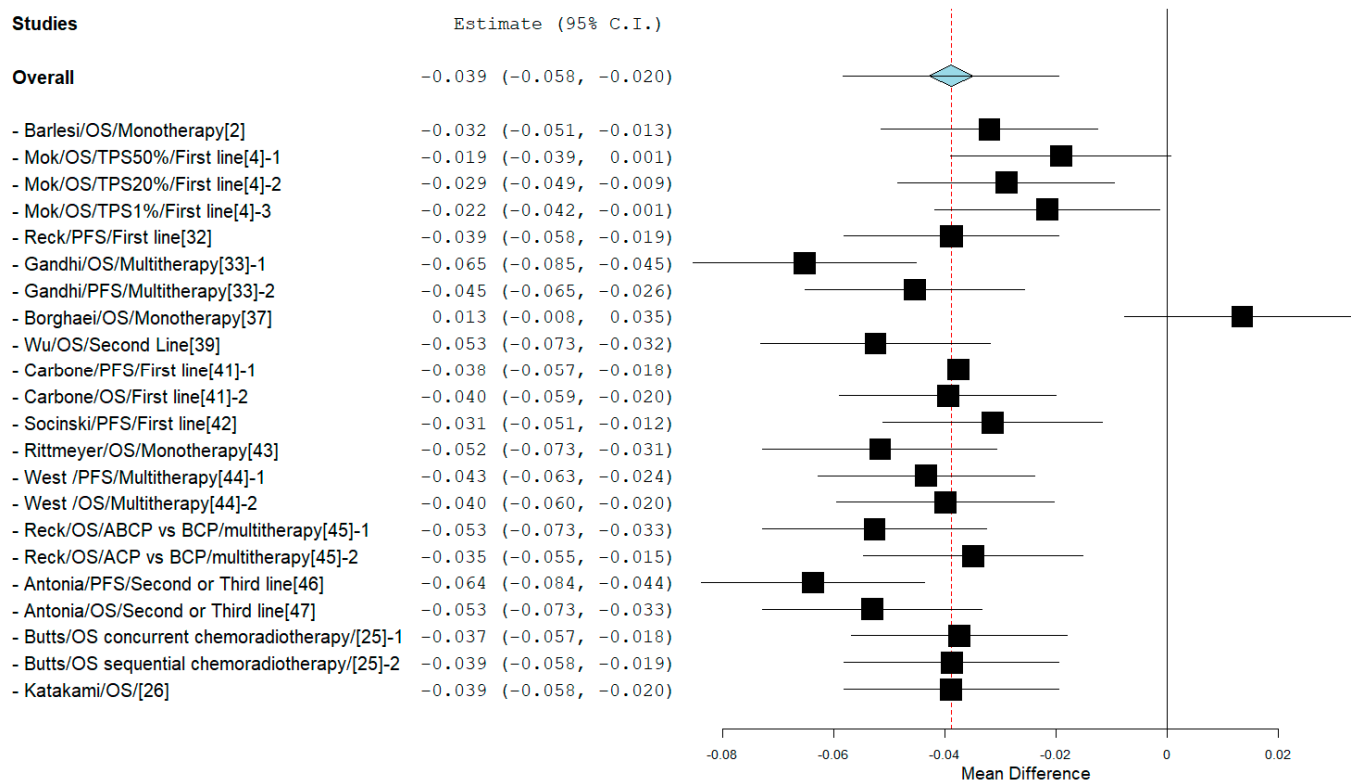

**Supplemental Figure s53. Response to treatment between smoker and non-smokers when treated with anti-PD-1 and anti-MUC1 drugs using FE leaveoneout model in cancer patients.**

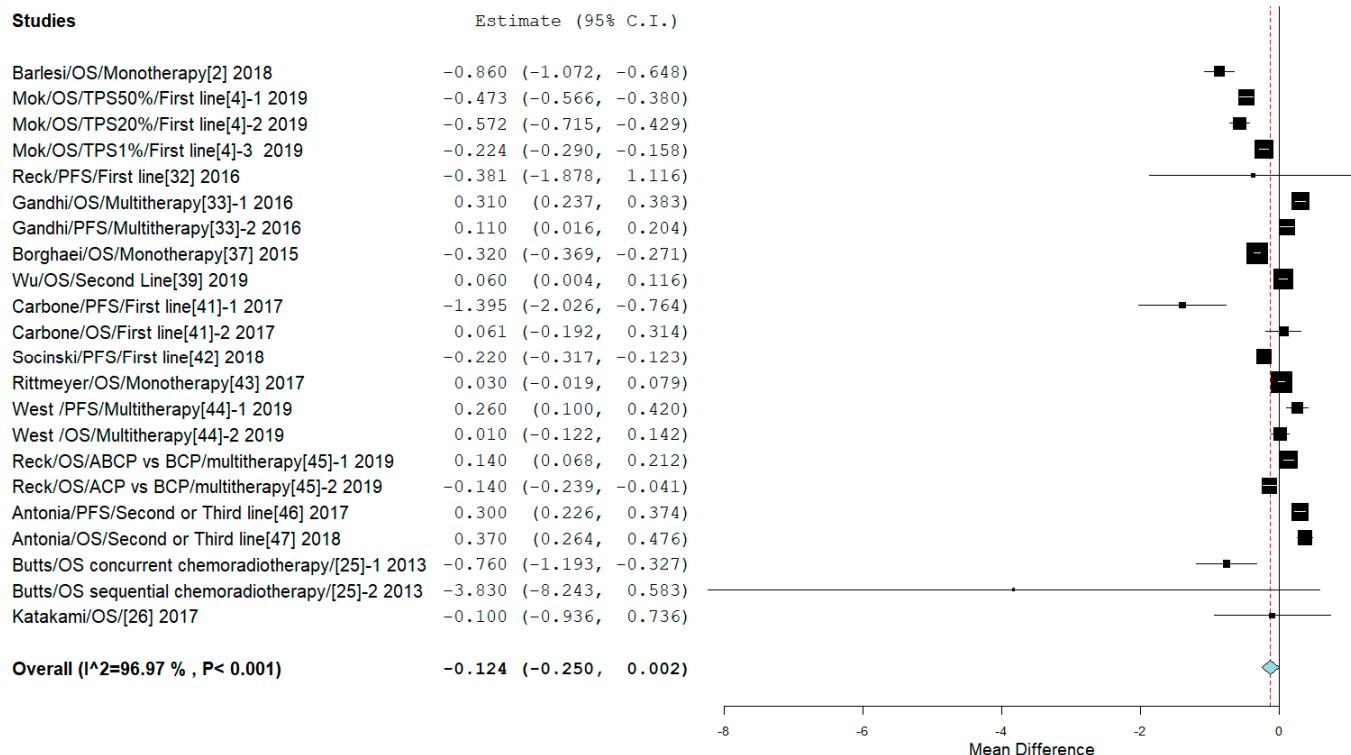

**Supplemental Figure s54. Response to treatment between smoker and non-smokers when treated with anti-PD-1 and anti-MUC1 drugs using RE model in cancer patients.**

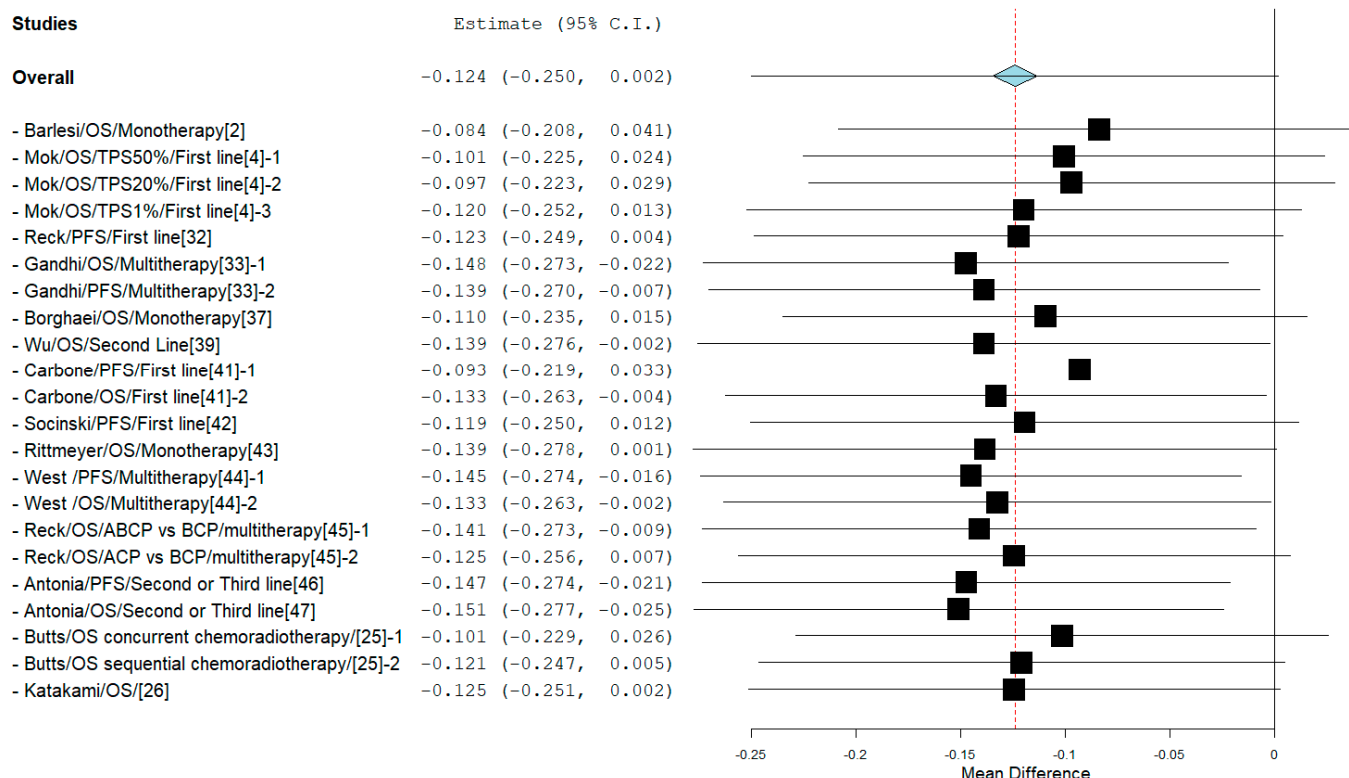

**Supplemental Figure s55. Response to treatment between smoker and non-smokers when treated with anti-PD-1 and anti-MUC1 drugs using RE leaveoneout model in cancer patients.**

## PART E.

### GFR inhibitors used in NSCLC with EGFR gene mutations

#### Response to EGFR inhibitors for non-squamous cell NSCLC

The effects of several drugs that target the epidermal growth factor receptor (EGFR) have been reported in clinical trials. These drugs have been used alone (without chemo) as the first treatment for advanced

NSCLCs that have certain mutations in the *EGFR* gene, or in combination with chemotherapy or other drugs. We first examined their effects on smoker and non-smoker patients to EGFR drugs. The results indicated that smokers showed a smaller responded worse than that of the non-smokers

#### *a. Erlotinib*

Erlotinib is an inhibitor of the EGFR tyrosine kinase and has been used in the treatment of NSCLCs. A total of 18 publications were obtained by searching with key words “Erlotinib phase-3” with three recent publications on the clinical trials phase 3 for NSCLC. One contained data on smoking status. A total of 141 publications of clinical trials were obtained by searching with key words “Erlotinib phase-III”. Of these, 97 were studies of NSCLC.

Eventually data from 10 trials were collected <sup>33-42</sup> (Tabulation S5). Among these 10 studies, in only one trial did nonsmokers (with a relatively small number of 45 patients) have an obviously higher mean HR than the combined sample of current and former smokers in 108 patients. <sup>38</sup>

Median survival, months

**Supplemental Tabulation S5. HR of smokers and non-smokers of NSCLC patients treated with EGFR inhibitors.**

| Study (First Author)/Drug                                      | EGFR<br>Mutati<br>on | analyti<br>c<br>Metrix | Current/#Patie<br>nts    | Former/#<br>Patients            | Never/#Pati<br>ents          | Overall/#Pa<br>tients     |
|----------------------------------------------------------------|----------------------|------------------------|--------------------------|---------------------------------|------------------------------|---------------------------|
| Wu/ combination of<br>chemotherapy and erlotinib<br>[33]       | 24%                  | PFS                    | 0.77 (0.54-<br>1.10)/131 | 0.87<br>(0.58-<br>1.30)<br>/101 | 0.40<br>(0.30—<br>0.54) /219 | 0.57 (0.47-<br>0.69) /650 |
| Saito/ Erlotinib plus<br>bevacizumab versus<br>erlotinib/ [34] | 56%                  | PFS                    | 0.63 (0.35-<br>1.11) /82 | 2.95<br>(0.30-<br>28.5) /13     | 0.54 (0.33-<br>0.90)/129     | 0.63/224                  |

|                                                                       |        |                       |                       |                       |                       |                       |
|-----------------------------------------------------------------------|--------|-----------------------|-----------------------|-----------------------|-----------------------|-----------------------|
| Rosell/ Erlotinib versus standard chemotherapy [35]                   | 100%   | PFS                   | 0.56 (0.15-2.15) /19  | 1.05 (0.40-2.74) /34  | 0.24 (0.15-0.39) /120 | 0.37(0.25-0.54) /173  |
| Ciuleanu/ erlotinib versus chemotherapy in second-line treatment [36] | 67-70% | OS                    | 0.90 (0.81-1.19) /227 | 1.10 (0.73-1.66) /123 | 0.86 (0.94-1.51) /74  | 0.96 (0.78-1.19) /424 |
| Zhou/ Erlotinib versus chemotherapy as first-line [37]                | 100    | PFS                   | 0.21(0.09-0.49) /45   |                       | 0.14(0.08-0.25) /109  | 0.16 (0.10-0.26) /154 |
| Zhou/ Erlotinib versus chemotherapy as first-line [38]                | 100    | OS                    | 0.85(0.44-1.64)/109   |                       | 1.44(0.93-2.24)/45    | 1.19(0.83-1.71)/154   |
| Cappuzzo/ Erlotinib as maintenance treatment [39]                     | 55-58% | PFS                   | 0.80 (0.67-0.97) /490 | 0.66 (0.50-0.88) /242 | 0.56 (0.38-0.81) /152 | 0.71 (0.62-0.82) /884 |
|                                                                       |        | OS                    | 0.88 (0.72-1.08) /493 | 0.75 (0.56-1.00) /244 | 0.69 (0.45-1.05) /152 | 0.81(0.70-0.95) /889  |
| Kelly/ Erlotinib Versus Placebo [40]                                  | 16-20% | disease-free survival | 0.79(0.446-1.406)/111 | 0.93(0.724-1.185)/663 | 0.91(0.596-1.387)/199 | 0.90(0.741-1.104)/973 |



|                                                                                     |                           |     |                                            |                                       |                       |                       |
|-------------------------------------------------------------------------------------|---------------------------|-----|--------------------------------------------|---------------------------------------|-----------------------|-----------------------|
| Kawaguchi/ erlotinib versus docetaxel as second- or third [41]                      | All wild type             | PFS | 1.20(0.91-1.56)/225                        |                                       | 1.37(0.83-2.23)/76    | 1.22(0.97-1.55)/301   |
| Gridelli/ erlotinib followed by second-line cisplatin-gemcitabine [42]              | 39 positive /236 negative | OS  | 1.27(1.06-1.54)/603                        |                                       | 1.08(0.72-1.61)/157   | 1.22(1.03-1.44)/760   |
|                                                                                     |                           | PFS | 1.24(1.04-1.48)/603                        |                                       | 1.01(0.70-1.43)/157   | 1.19(1.01-1.39)/760   |
| Miller/ Afatinib versus placebo/after failure of erlotinib, gefitinib, or both [43] | 62 Positive 31 Negative   | OS  | 0.81 (0.56-1.17) /118 (current and former) | 2.19 (0.74-6.48) /13 (existing light) | 1.20 (0.90-1.61) /245 | 1.08 (0.86-1.35) /390 |
|                                                                                     |                           | PFS | 0.46 (0.32-0.68) /118                      | 0.30 (0.12-0.71) /27                  | 0.36 (0.28-0.48) /245 | 0.38 (0.31-0.48) /390 |
| Wu/ Afatinib versus cisplatin plus gemcitabine for first-line [44]                  | 100%                      | PFS | 0.39(0.07-2.41)/12                         | 0.46 (0.22-1.00) /72                  | 0.24 (0.16-0.34) /280 | 0.28 (0.20-0.39) /364 |
| Soria/ Afatinib versus erlotinib as second line [45]                                | Not reported              | PFS | 0.85 (0.72-1.01) 728                       | 0.44(0.14-1.37)/23                    | 0.55 (0.27-1.11)/44   | 0.81(0.69-0.96)/795   |
|                                                                                     |                           | OS  | 0.81(0.69-0.96)                            | 0.43(0.16-1.12)/                      | 0.77 (0.37-1.57)/     | 0.81(0.69-0.95)       |
| Shi/ Icotinib versus gefitinib in previous treated [46]                             | 43-59%                    | PFS | 0.96 (0.71-1.31) /192                      |                                       | 0.72 (0.52-1.00) /203 | 0.83(0.67-1.05)397    |

|                                                                |                           |                    |                         |                         |                          |
|----------------------------------------------------------------|---------------------------|--------------------|-------------------------|-------------------------|--------------------------|
| Zhang/ Gefitinib versus placebo [47]                           | >=15%                     | PFS                | 0.52 (0.35-0.75) /136   | 0.36 (0.25-0.51) /160   | 0.42 (0.33-0.55) /296    |
| Mitsudomi/ Gefitinib versus cisplatin plus docetaxel [48]      | 100%                      | PFS                | 0.575 (0.294-1.123) /54 | 0.466 (0.297-0.732)/118 | 0.489 (0.336-0.710) /172 |
| Zhong/ Gefitinib versus vinorelbine plus cisplatin [49]        | 99-100%                   | PFS                | 0.56 (0.27-1.19) /52    | 0.61 (0.40-0.92) /167   | 0.58 (0.40-0.83) /222    |
| Soria/ Osimertinib in Untreated EGFR-Mutated [50]              | All Mutation              | PFS                | 0.48(0.34-0.68)/199     | 0.45(0.34-0.59)/357     | 0.46(0.37-0.57)/556      |
| Mok / Osimertinib or Platinum-Pemetrexed [51]                  | All mutation              | PFS                | 0.40(0.27-0.62)/136     | 0.36(0.26-0.49)/283     | 0.37(0.29-0.48)/419      |
| Ellis/ Dacomitinib compared with placebo [52]                  | >=24-28%                  | PFS                | 0.80(0.66-0.98)         | 0.51 (0.39-0.67)        | -                        |
|                                                                | Plus <i>KRAS</i> mutation | OS                 | 1.13 (0.91-1.40) /456   | 0.74 (0.56-0.98)/264    | -                        |
| Wu/ Dacomitinib versus gefitinib [53]                          | Mutation positive         | PFS                | 0.72 (0.49-1.05) /161   | 0.51 (0.39-0.68) /291   | 0.58 (0.46-0.73) /452    |
| Ramalingam/ Dacomitinib versus erlotinib previous treated [54] | >=10-14%                  | PFS (all patients) | 0.98 (0.82-1.16) /717   | 0.76 (0.52-1.13) /161   | 0.94 (0.80-1.10) /878    |

|                                                                     |                                                                          |                              |                       |                      |                       |                        |
|---------------------------------------------------------------------|--------------------------------------------------------------------------|------------------------------|-----------------------|----------------------|-----------------------|------------------------|
|                                                                     |                                                                          | patients with KRAS wild type | 1.02 (0.81-1.27)      |                      | 0.93(0.57-1.50)       | 1.02 (0.83-1.25)       |
|                                                                     |                                                                          | OS                           | 1.08 (0.90-1.29) /717 |                      | 0.85 (0.54-1.34) /161 | 1.08/878               |
| Thatcher /<br>Necitumumab plus<br>gemcitabine and cisplatin<br>[55] | EGFR expression was high (H-score $\geq 200$ ) in 374 (38%) of 982 cases | OS                           | 0.85 (0.74-0.98)/781  |                      | 0.82 (0.52-1.29)/78   | 0.84 (0.74-0.96) /1093 |
|                                                                     |                                                                          | PFS                          | 0.85 (0.74-0.98) /776 |                      | 0.88 (0.55-1.40) /72  | 0.85 (0.74-0.98) /1093 |
| Paz-Ares /<br>Necitumumab plus<br>pemetrexed and cisplatin<br>[56]  | 490 patients with high expression                                        | OS                           | 1.05 (0.85-1.30)/423  | 0.81 (0.59-1.27)/101 | 1.04 (0.66-1.64) /109 | 1.01 (0.84-1.01) /633  |

#### ***b. Afatinib (Gilotrif)***

Afatinib is a tyrosine kinase inhibitor used to treat NSCLC that has advanced to include metastasized tumors with mutations of EGFR. A total of 6 publications were obtained by searching with key words “Afatinib phase-3”, for clinical trials. Two of them are for NSCLC and contained analysis of the effect of smoking

status. A total of 32 publications were obtained by searching with key words “Afatinib phase-III”, for clinical trials. However, based on the criteria, no additional qualified publications were identified.

In one report by Miller et al, PFS and OS showed a mixture of HR values of current and former smokers in comparison to that of non-smokers <sup>43</sup> while the other study showed that smokers showed higher or similar mean HR values than non-smokers <sup>44</sup> (**Tabulation S5**).

#### ***c. Gefitinib (Iressa)***

Gefitinib is another EGFR inhibitor, like erlotinib, which interrupts cancer signaling through the EGFR. A total of 20 publications were obtained by searching with key words “Gefitinib phase-3”, for clinical trials. Two of them are for NSCLC and reported the effect of smoking status. A total of 87 publications were obtained by searching with key words “Gefitinib phase-III”, for clinical trials. Three additional studies for NSCLC contained an analysis of smoking status. In four of these, the HR values of smokers were higher than that of non-smokers, <sup>45-48</sup> while in the other study, mean HR was similar between smokers and non-smokers <sup>49</sup> (**Tabulation S5**).

#### ***d. Osimertinib***

Osimertinib is a third-generation EGFR tyrosine kinase inhibitor. A total of three publications were obtained by searching with key words “Osimertinib phase-3” for clinical trials. Two of them were for NSCLC and contained analysis of smoking status. Searching with “Osimertinib phase-III” for clinical trials resulted in four publications, but no new smoking data were obtained. In these two studies, the mean HR of non-smokers was similar to that of smokers <sup>50, 51</sup> (**Tabulation S5**).

#### ***e. Dacomitinib***

Dacomitinib is a selective and irreversible inhibitor of EGFR. A total of three reported clinical trials that included analysis of smoking status were obtained by searching with key words “Dacomitinib phase-3” for NSCLC. <sup>52-54</sup> Searching with “Dacomitinib phase-III” for clinical trials resulted in five publications, but no

new smoking data were obtained. In all three studies, mean HR values of smokers are higher than that of non-smokers<sup>52-54</sup> (**Tabulation S5**).

The majority of these trials tested one drug alone or compared one with another. Therefore, these data demonstrated that non-smokers responded to EGFR inhibitors better than smokers.

### **Response to EGFR inhibitor Necitumumab, for squamous cell NSCLC**

Necitumumab has been used along with chemotherapy as the first treatment in people with advanced squamous cell NSCLC. A total of five publications were obtained by searching with key words “Necitumumab phase-3”, for clinical trials. Two of them are for NSCLC and include data for smoking status. Searching with “Necitumumab phase-III” for clinical trials resulted publications, but these did not include smoking status data were. In these two studies, the mean HR values between smokers and non-smokers were similar (**Tabulation S5**).<sup>55, 56</sup>

### **Meta-analysis of EGFR inhibitors used in NSCLC with EGFR gene mutations**

We next analyzed separately the HR values from patients treated with EGFR (**Tabulation S6**). Together, the non-smokers had a mean HR of 0.027 which was lower

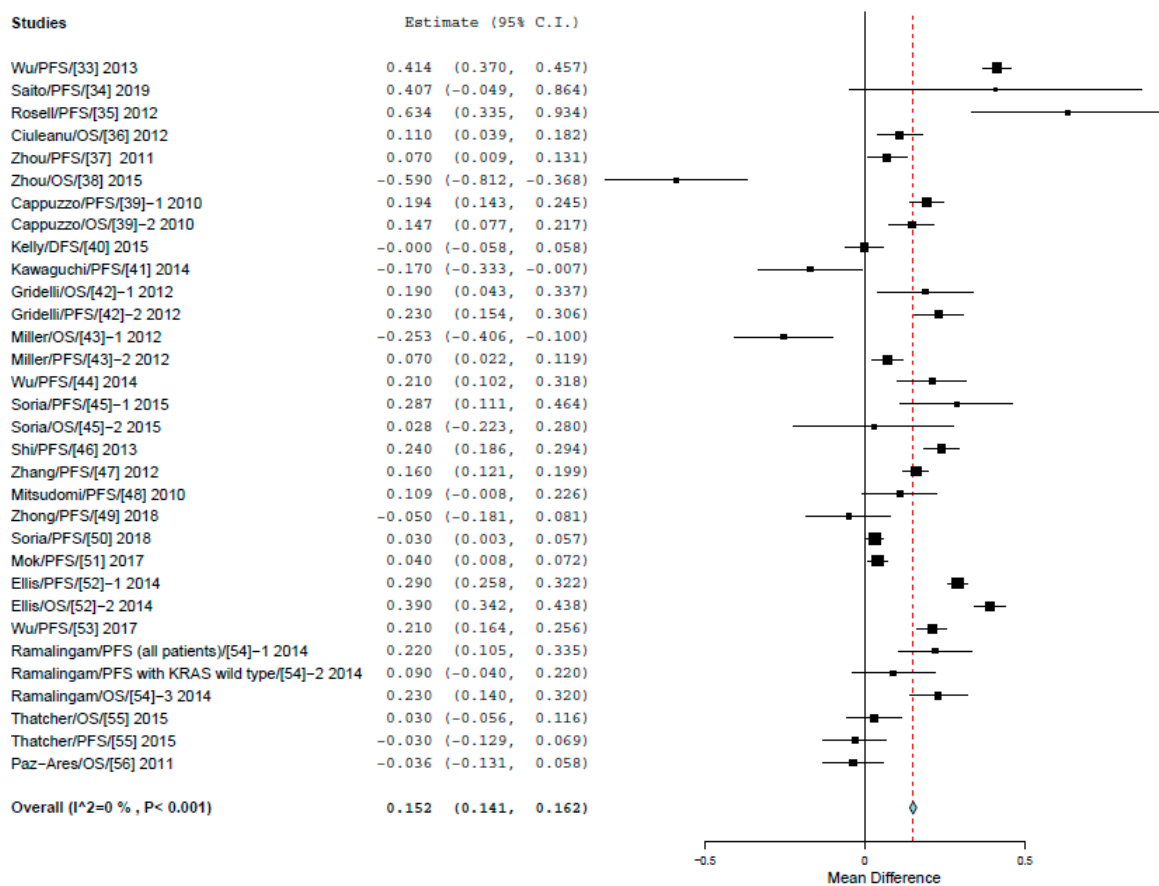

**Supplemental Figure s56.** Smokers vs non-smokers in response to treatment with EGFR drugs with fixed effect model (FE)

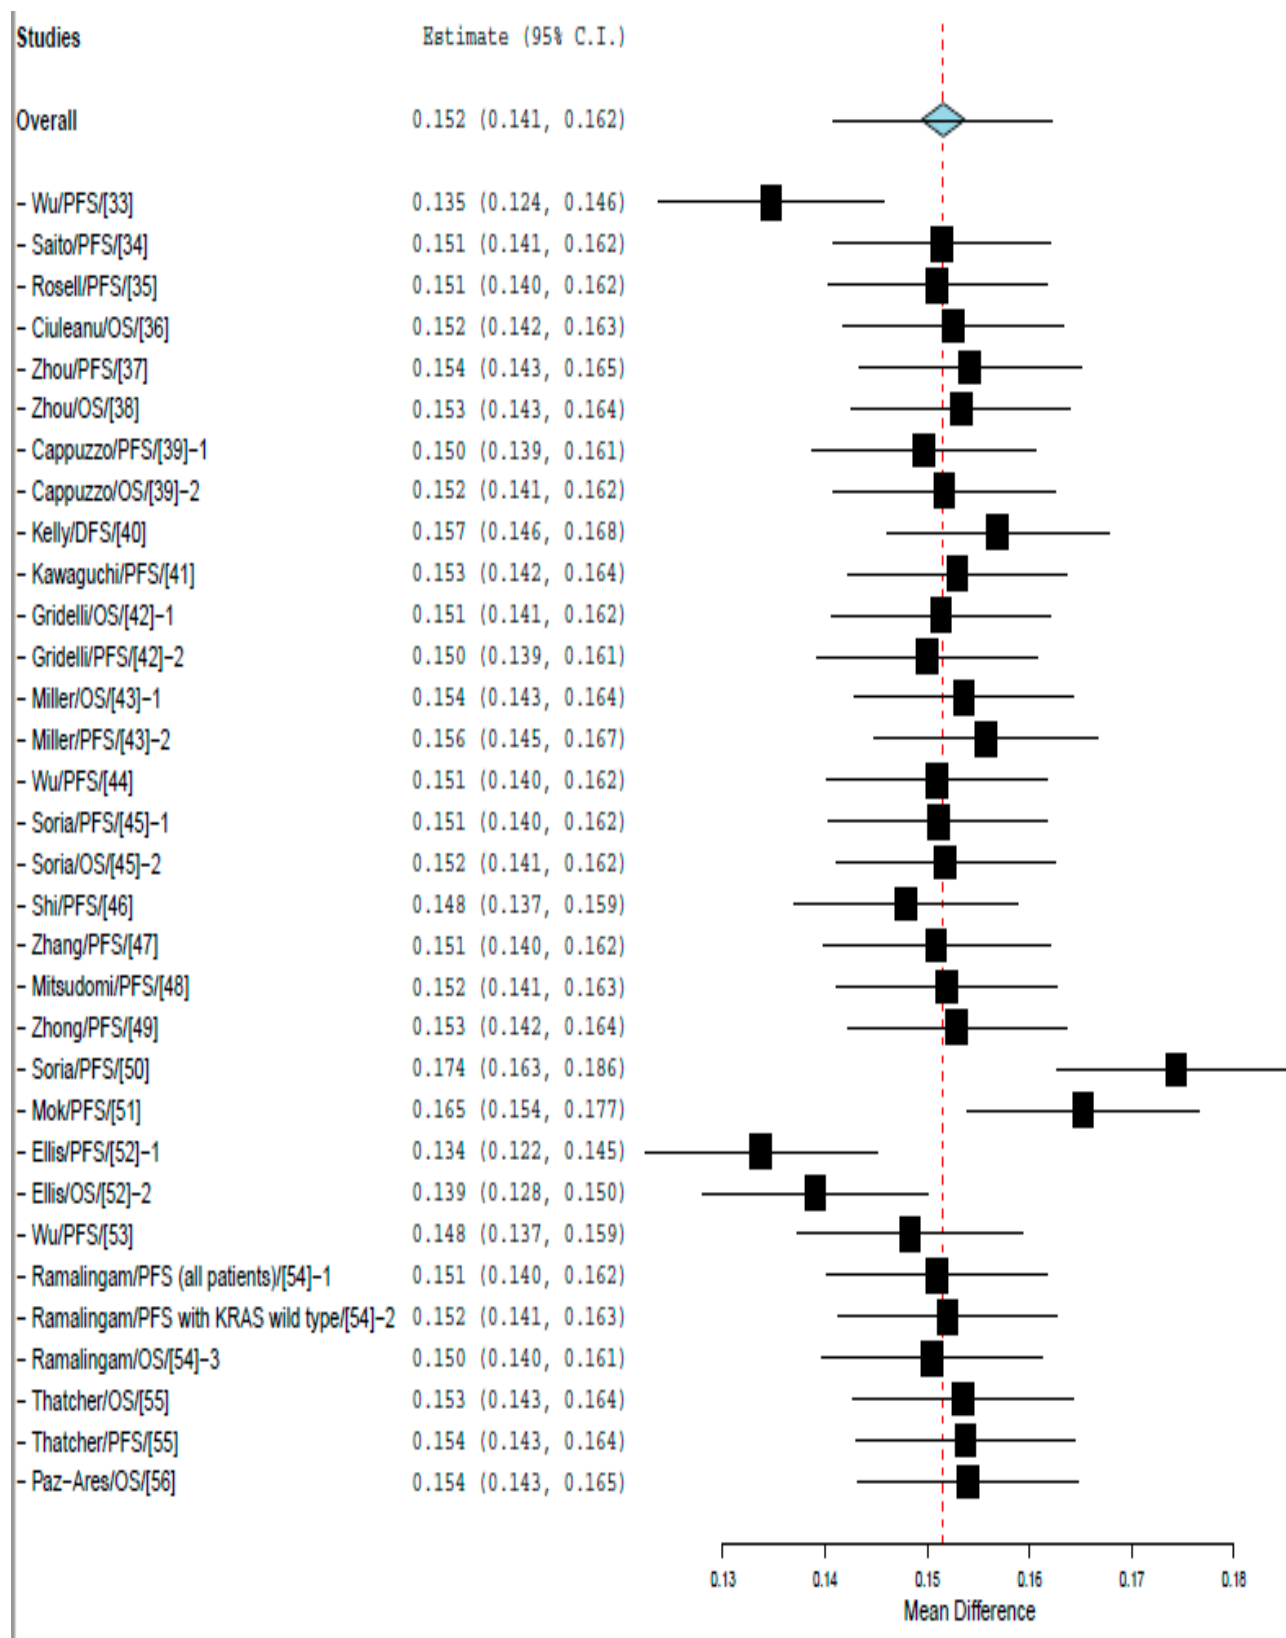

**Supplemental Figure s57.** Smokers vs non-smokers in response to treatment with EGFR drugs with FE

leaveoneout model



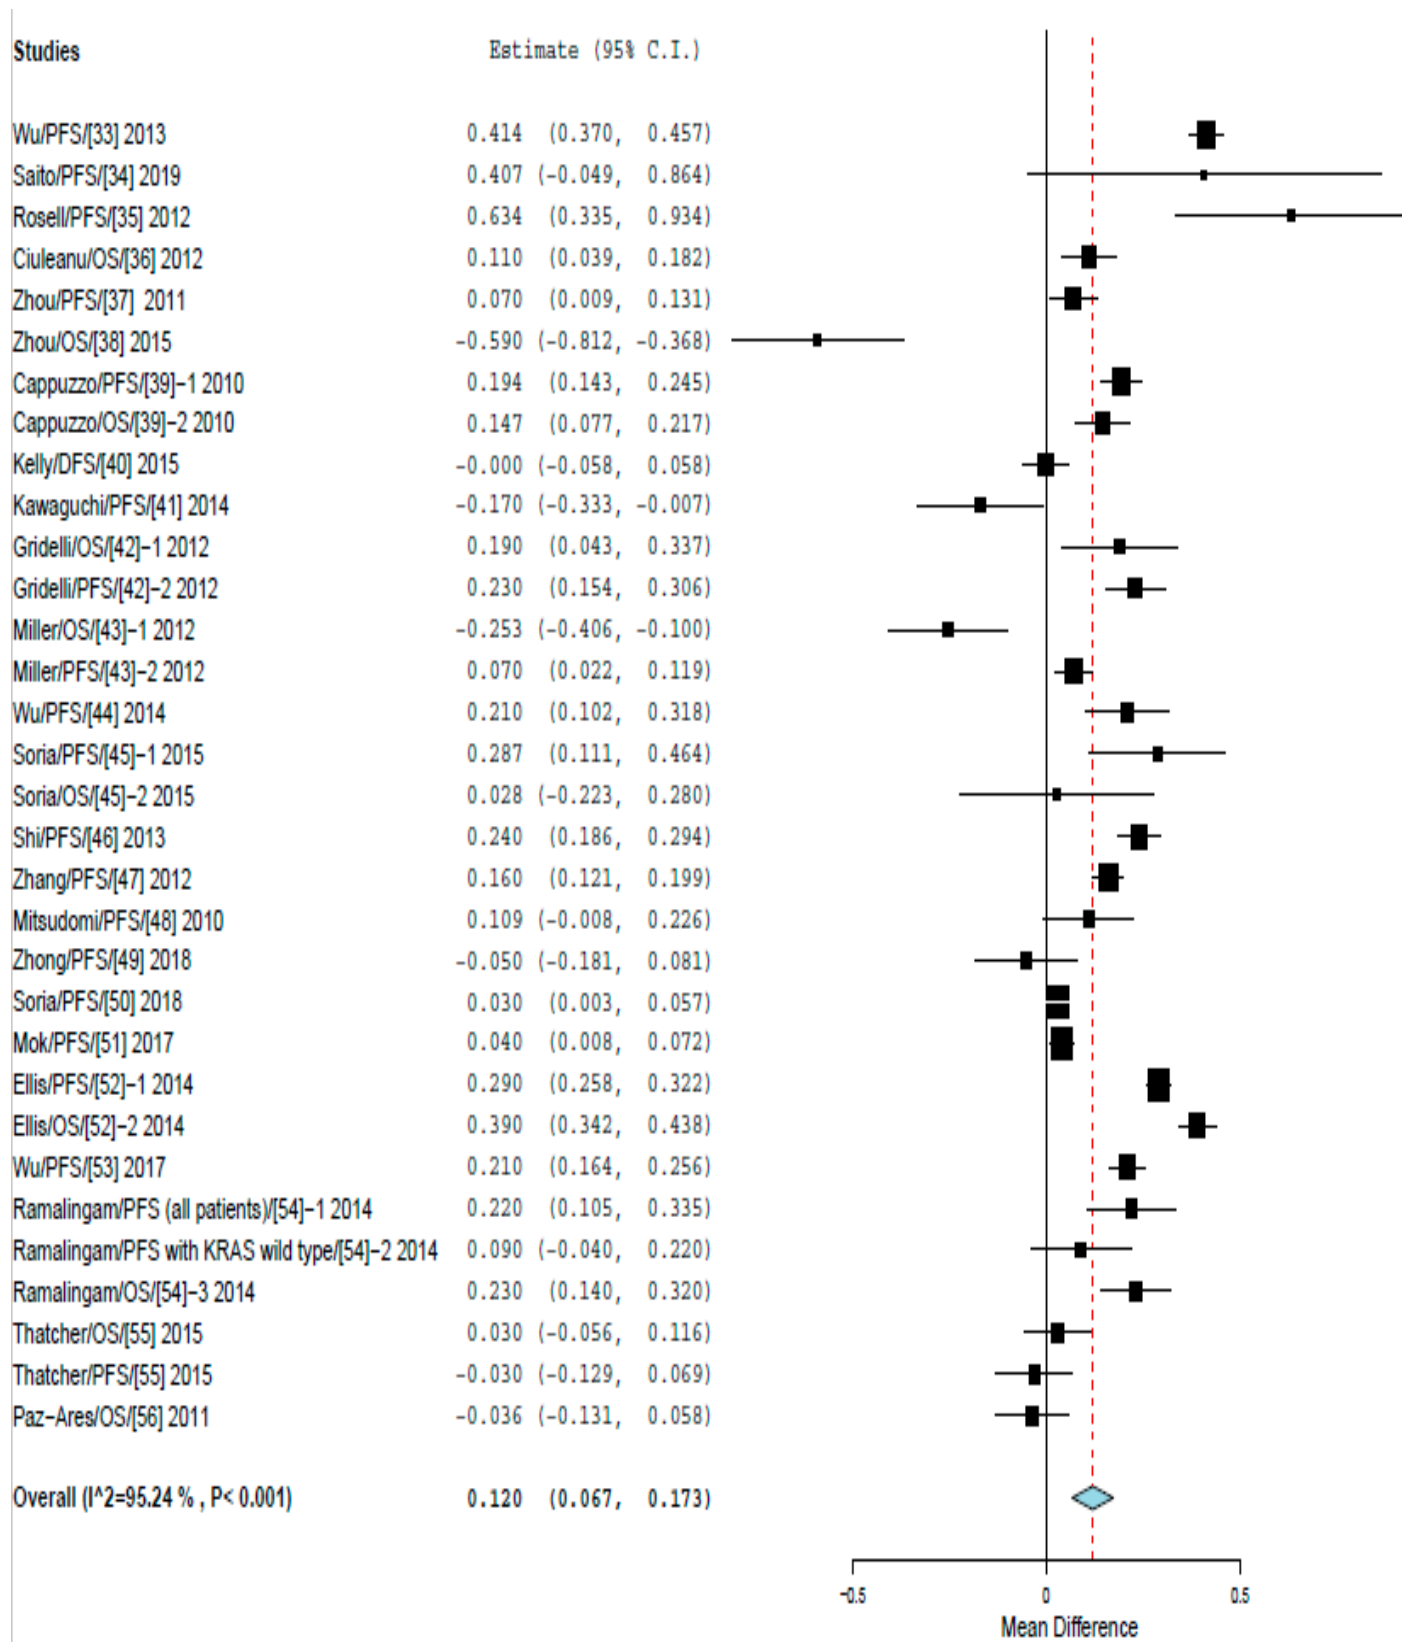

**Supplemental Figure s58.** Smokers vs non-smokers in response to treatment with EGFR drugs with random

effect (RE) model

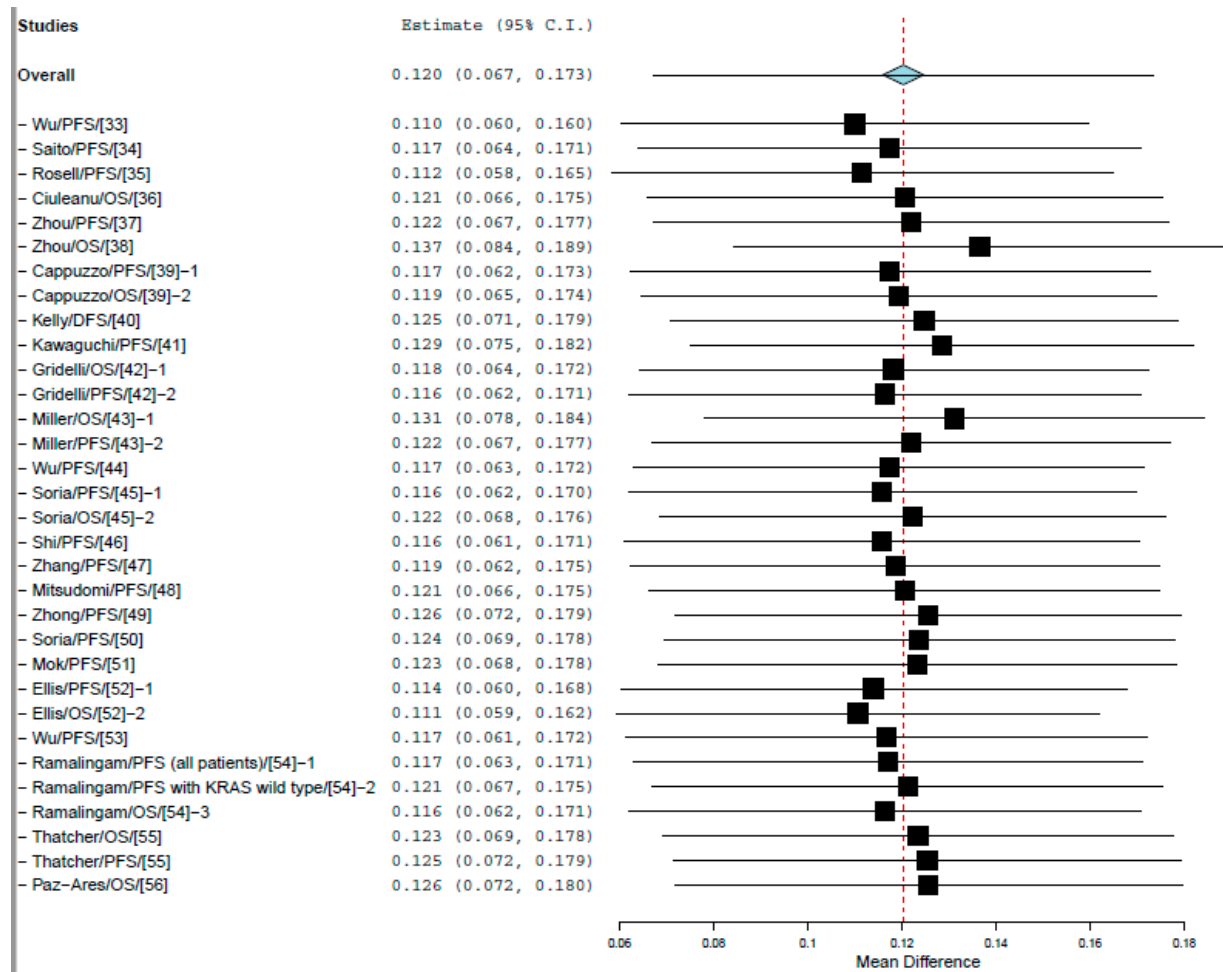

**Supplemental Figure s59.** Smokers vs non-smokers in response to treatment with EGFR drugs with RE leaveoneout model

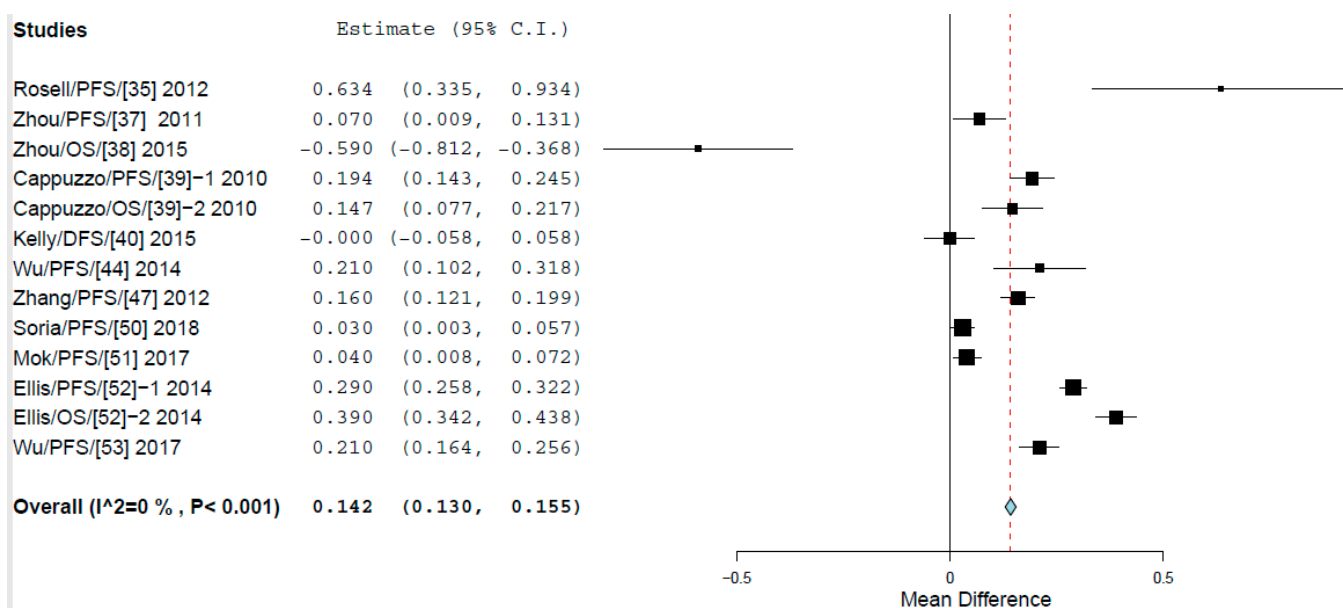

**Supplemental Figure s60.** Smokers vs non-smokers in response to EGFR drugs as the first-line treatment with fixed effect model (FE)

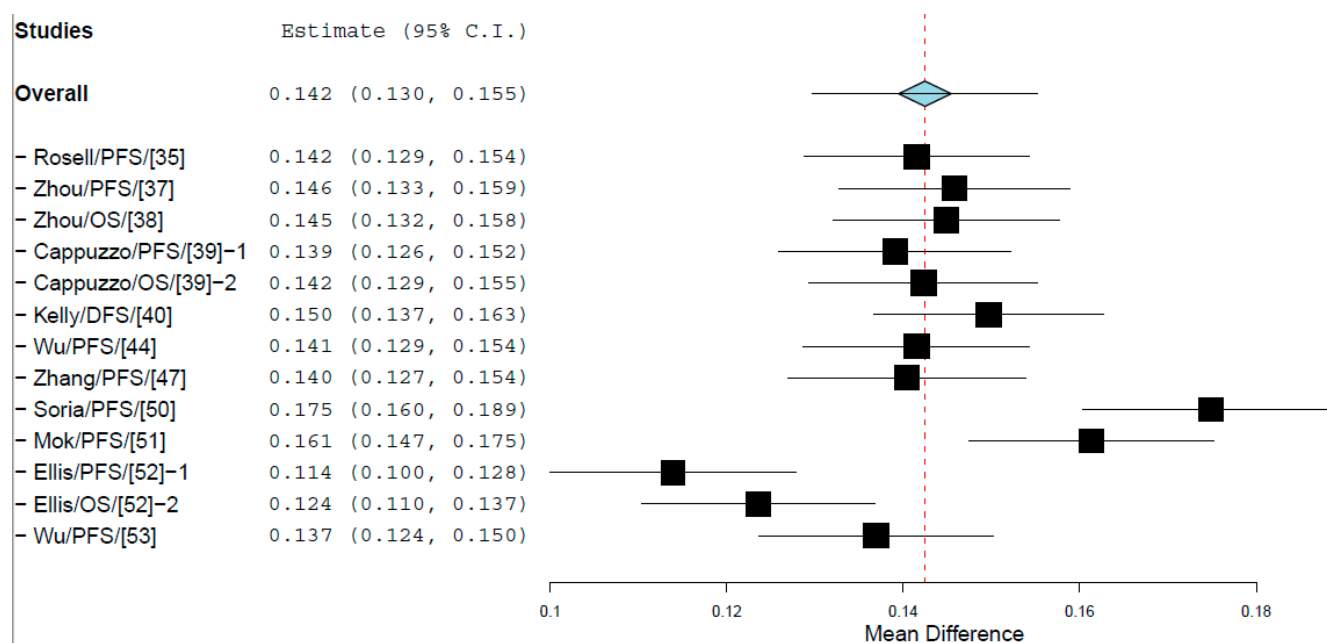

**Supplemental Figure s61.** Smokers vs non-smokers in response to EGFR drugs as the first-line treatment with FE leaveoneout model

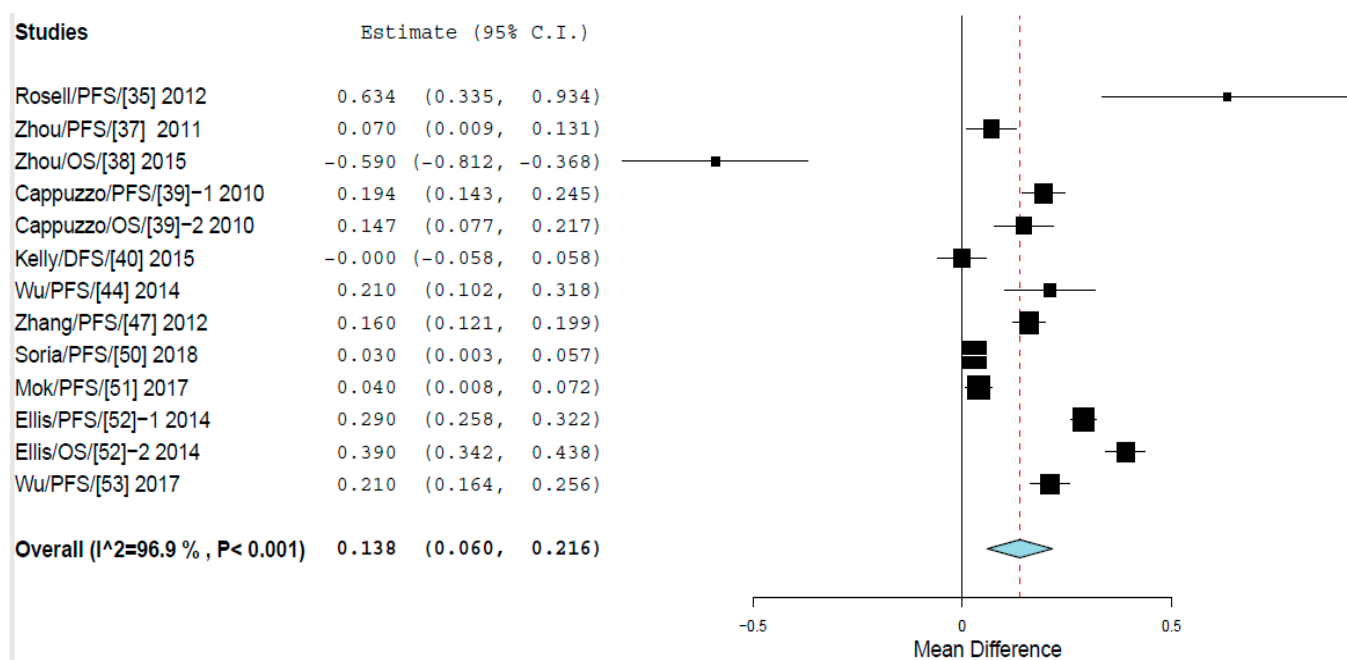

**Supplemental Figure s62.** Smokers vs non-smokers in response to EGFR drugs as the first-line treatment with random effect model (RE)

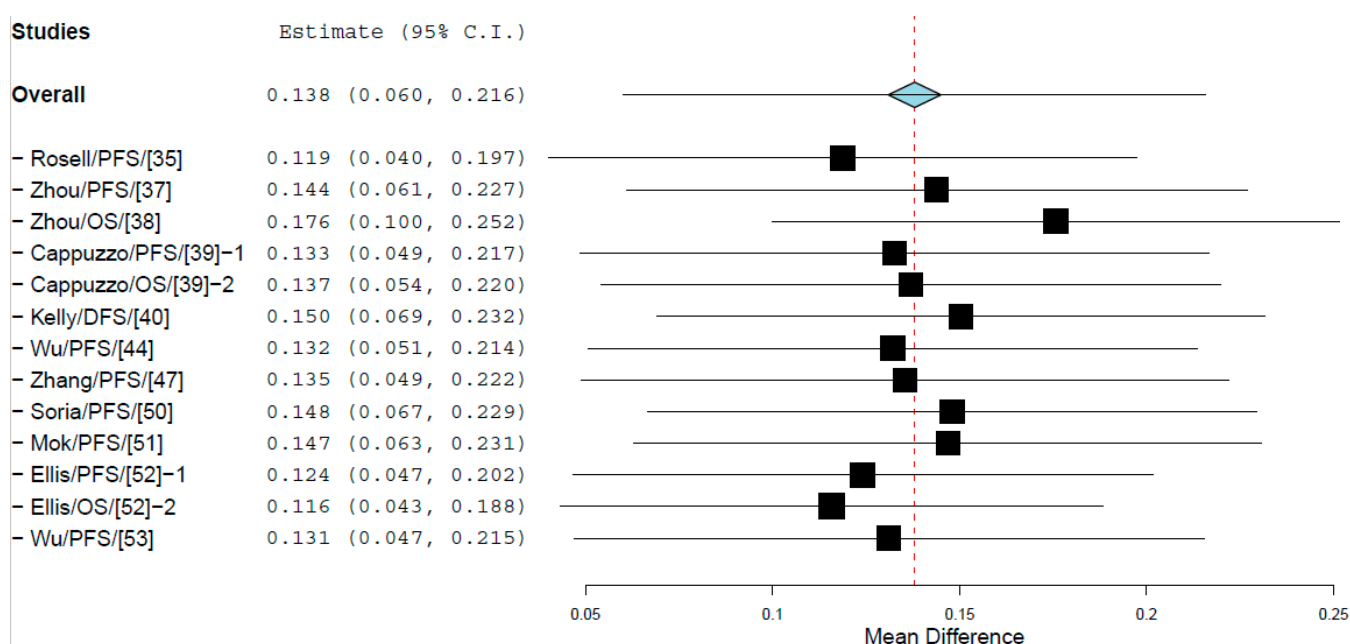

**Supplemental Figure s63.** Smokers vs non-smokers in response to EGFR drugs as the first-line treatment with RE leaveoneout model

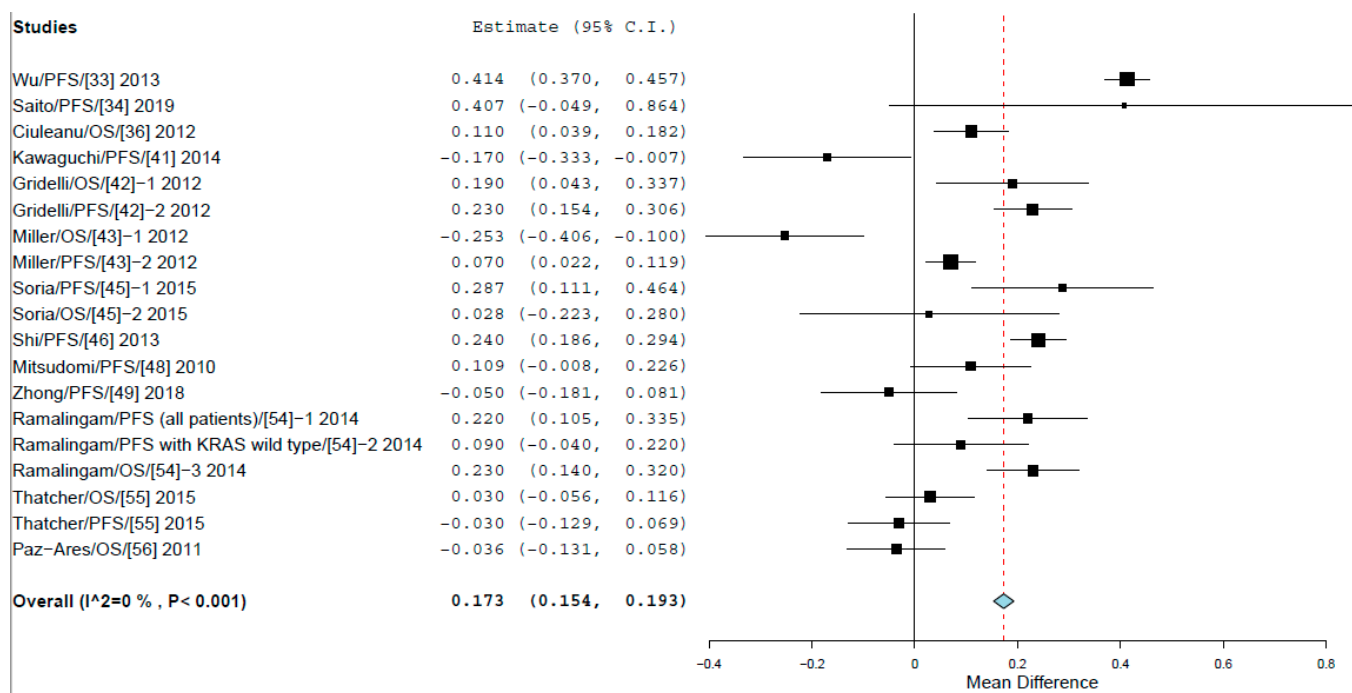

**Supplemental Figure s64.** Smokers vs non-smokers in response to EGFR drugs in multiple drug treatment with Fixed effect (FE) model

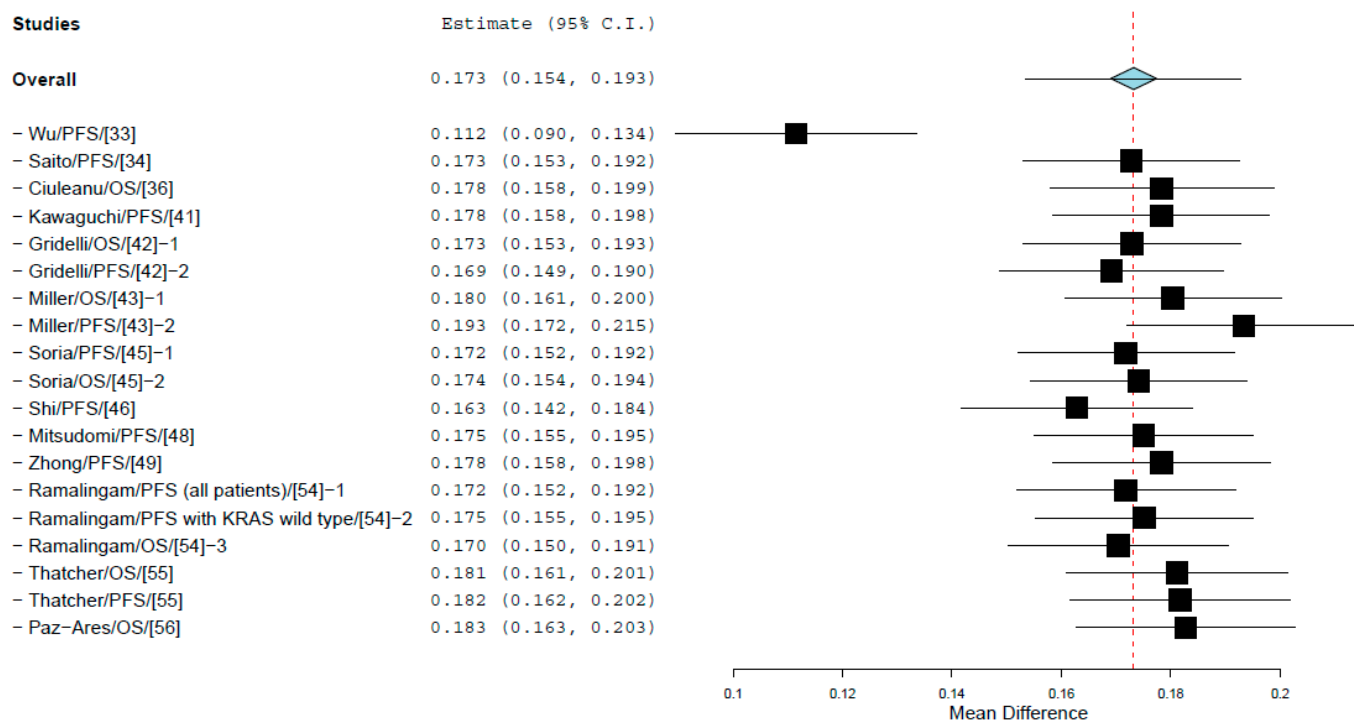

**Supplemental Figure s65.** Smokers vs non-smokers in response to EGFR drugs in multiple drug treatment with FE leaveoneout model

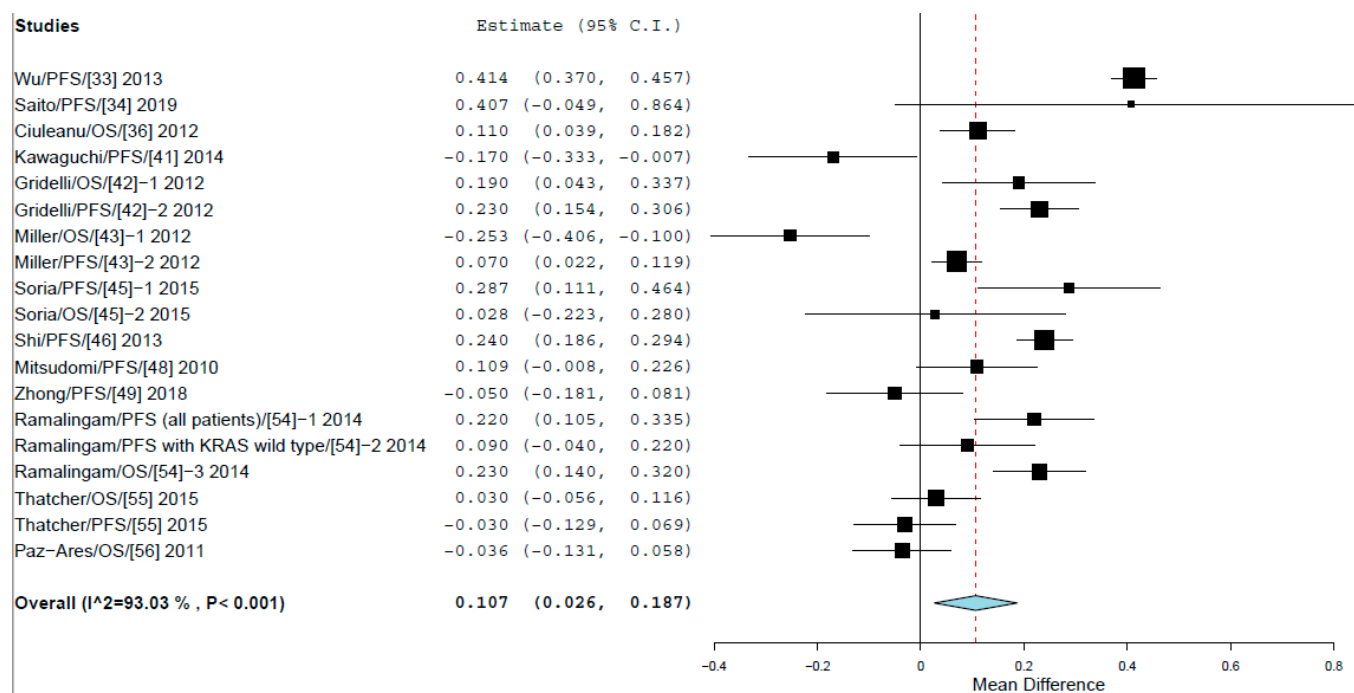

**Supplemental Figure s66.** Smokers vs non-smokers in response to EGFR drugs in multiple drug treatment with random effect (RE) model

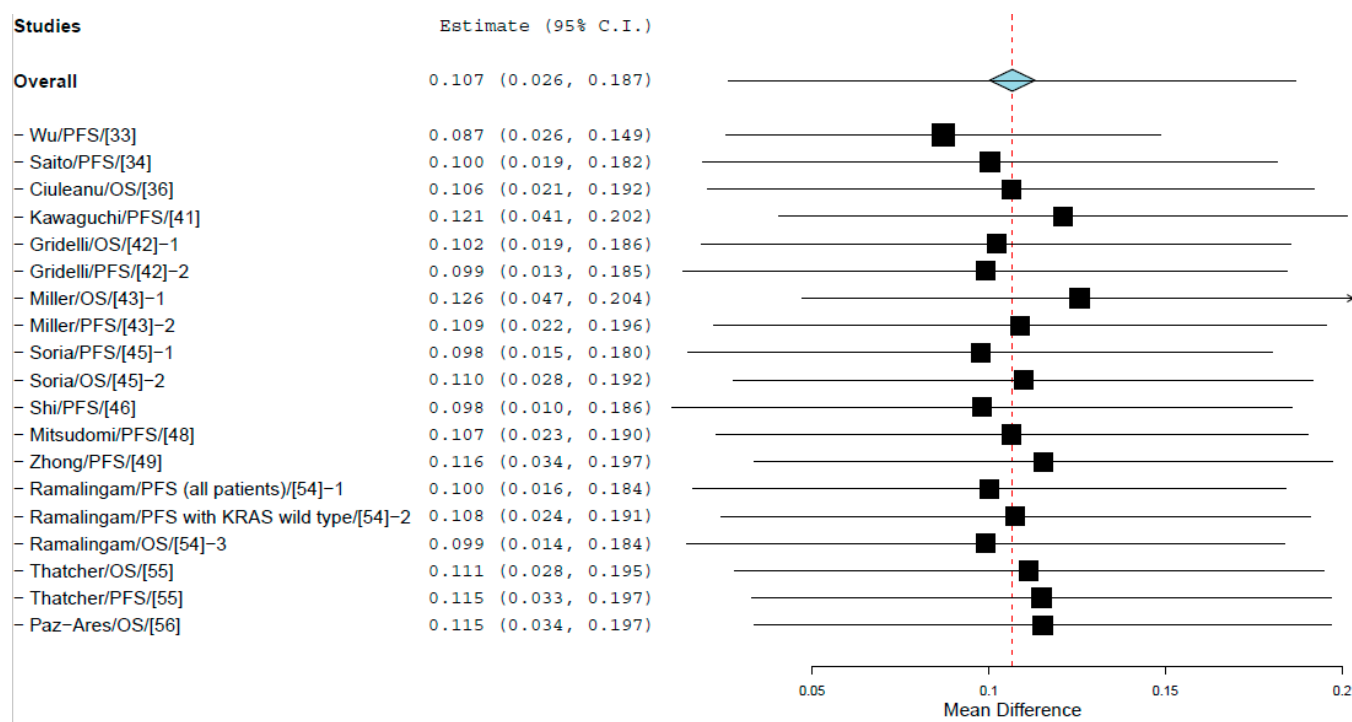

**Supplemental Figure s67.** Smokers vs non-smokers in response to EGFR drugs in multiple drug treatment with RE leaveoneout model

### Meta-analysis of EGFR inhibitors used in NSCLC with VEGF gene mutations

We next analyzed separately the HR values from patients treated with VEGF (Tabulation s6). Together, the non-smokers had a mean HR of 0.027 which was lower

**Supplemental Tabulation S6 HR of smokers and non-smokers of NSCLC patients treated with drugs targeting VEGF**

| Study (First Author)/Drug | VEGF Mutation | analytic Metrix | Current/# Patients | Former/# Patients | Never/#Patients | Overall/#Patients |
|---------------------------|---------------|-----------------|--------------------|-------------------|-----------------|-------------------|
|---------------------------|---------------|-----------------|--------------------|-------------------|-----------------|-------------------|

|                                                                                                                          |                                              |                       |                        |                     |                       |                        |
|--------------------------------------------------------------------------------------------------------------------------|----------------------------------------------|-----------------------|------------------------|---------------------|-----------------------|------------------------|
| Herbst/ bevacizumab plus erlotinib versus erlotinib/ second treatment [57]                                               | ~20%                                         | OS                    | 1.06 (0.87-1.29) /569  |                     | 0.44 (0.21-0.94) /67  | 0.97 (0.80-1.18) /636  |
| Wakelee/ chemotherapy with or without bevacizumab [58]                                                                   | Not Found                                    | OS                    | 0.99 (0.82-1.19) /1344 |                     | 0.84 (0.36-1.96) /155 | 0.99 (0.82-1.19) /1501 |
|                                                                                                                          |                                              | Disease-free survival | 0.99 (0.85-1.16) /1344 |                     | 0.82 (0.46-1.45) /155 | 0.99 (0.86-1.15) /1501 |
| Barlesi/ maintenance bevacizumab with or without pemetrexed [59]                                                         | Not found                                    | PFS                   | 0.57(0.41-0.80)/188    |                     | 0.40(0.21-0.74)/64    | 0.48(0.35-0.66)/253    |
| Johnson / bevacizumab with or without erlotinib/, after completion of chemotherapy, with bevacizumab for first-line [60] | <i>VEGF</i> mutation status was not required | PFS                   | 0.74(0.54-1.01)/258    | 0.79(0.61-1.03)/358 | 0.34(0.19-0.61)/127   | -                      |

## Part F. NSCLC Patients response to treatment by drugs that target tumor blood vessel growth (angiogenesis)

Two angiogenesis inhibitors, Bevacizumab (Avastin) and Ramucirumab (Cyramza), have been used in the treatment of NSCLC.



Bevacizumab is a monoclonal antibody that targets vascular endothelial growth factor (VEGF). A total of 86 publications were obtained by searching with key words “Bevacizumab phase-3” for clinical trials. Twelve of them studied NSCLC and three included analysis of smoking status. Searching with “Dacomitinib phase-III” for clinical trials resulted in 60 publications, however only one with smoking data was obtained. Among these four studies, the HR values of smokers were higher than those of non- smokers<sup>57-60</sup> (**Tabulation S7**).

Ramucirumab is a monoclonal antibody that targets a VEGF receptor. A total of 13 publications were obtained by searching with key words “Ramucirumab phase-3” for clinical trials. No data for NSCLC studies included smoking status. Searching with “Ramucirumab phase-III” for clinical trials resulted in 30 publications, but none included smoking status data.

### Meta-analysis of drugs that target tumor blood vessel growth

We next analyzed HR values from patients treated with VEGF inhibitors (**Tabulation S7**). Together, the non-smokers had a mean HR of 0.148 compared to 0.226 for smokers. This result indicated that smokers responded worse than non-smokers (**Fig. S7**).

**Tabulation S7.** HR values of smokers and non-smokers of NSCLC patients treated with drugs targeting ALK gene

| Drug       | (First Author)/Method                            | analytic Metrix                                        | Current/<br>#Patients  | Former/#<br>Patients | Never/#Pati<br>ents        | Overall/#Pa<br>tients      |
|------------|--------------------------------------------------|--------------------------------------------------------|------------------------|----------------------|----------------------------|----------------------------|
| Crizotinib | Wu/ versus<br>Chemotherapy/e<br>ast Asian [61]   | PFS                                                    | 0.622(0.338-1.147)57   |                      | 0.323(0.216<br>-0.484)/150 | 0.402(0.286<br>-0.565)/207 |
|            | Solomon/<br>Versus<br>Chemotherapy/<br>ALK-final | Cox<br>proportion<br>al hazards<br>regression<br>model | 0.689(0.422-1.127)/125 |                      | 0.888(0.584<br>-1.350)/218 | 0.760(0.548<br>-1.053)/343 |

|           |                                                                                                  |     |                        |                        |                         |                         |
|-----------|--------------------------------------------------------------------------------------------------|-----|------------------------|------------------------|-------------------------|-------------------------|
|           | Mutation-<br>Positive [62]                                                                       |     |                        |                        |                         |                         |
|           | Solomon/ versus<br>chemotherapy<br>/ALK-positive<br>[63]                                         | PFS | 0.64(0.42-0.97)/125    |                        | 0.41(0.29-<br>0.58)/218 | 0.45(0.35-<br>0.60)/343 |
|           | Shaw/ versus<br>chemotherapy/<br>ALK-positive<br>[64]                                            | PFS | 0.53(0.34-0.83)/127    |                        | 0.45(0.32-<br>0.63)/219 | 0.49(0.37-<br>0.64)/347 |
| Ceritinib | Shaw/ versus<br>chemotherapy/<br>ALK-<br>rearranged/previ<br>ous treated<br>w/crizotinib<br>[65] | PFS | 0.68(0.40-1.14)/95     |                        | 0.41(0.27-<br>0.63)/132 | 0.49(0.36-<br>0.67)/231 |
|           | Soria/ versus<br>platinum-based/<br>ALK-rearranged<br>[66]                                       | PFS | 0.48(0.30-0.77)/146    |                        | 0.56(0.38-<br>0.80)/230 | 0.55(0.42-<br>0.73)/376 |
| Alectinib | Peters/ versus<br>Crizotinib/<br>Untreated ALK-<br>Positive [67]                                 | PFS | 1.16(0.35-<br>3.90)/17 | 0.42(0.23-<br>0.77)/96 | 0.44(0.29-<br>0.66)/190 | 0.48(0.35-<br>0.66)/303 |
|           | Hida/ versus<br>crizotinib/                                                                      | PFS | 0.18(0.08-0.42)/90     |                        | 0.50(0.28-<br>0.89)/117 | 0.34(0.21-<br>0.54)/207 |

|            |                                                         |     |                       |                        |                         |                         |
|------------|---------------------------------------------------------|-----|-----------------------|------------------------|-------------------------|-------------------------|
|            | ALK-positive<br>[68]                                    |     |                       |                        |                         |                         |
|            | Camidge/<br>Untreated ALK-<br>Positive [69]             | PFS | 1.16(0.35-<br>3.90)17 | 0.40(0.23-<br>0.69)/96 | 0.40(0.27-<br>0.59)/190 | 0.43(0.32-<br>0.59)/303 |
| Brigatinib | Camidge/versus<br>Crizotinib in<br>ALK-Positive<br>[70] | PFS | 0.51(0.27-0.97)/105   |                        | 0.47(0.27-<br>0.84)/159 | 0.49(0.33-<br>0.74)/275 |

Results of meta-analysis.

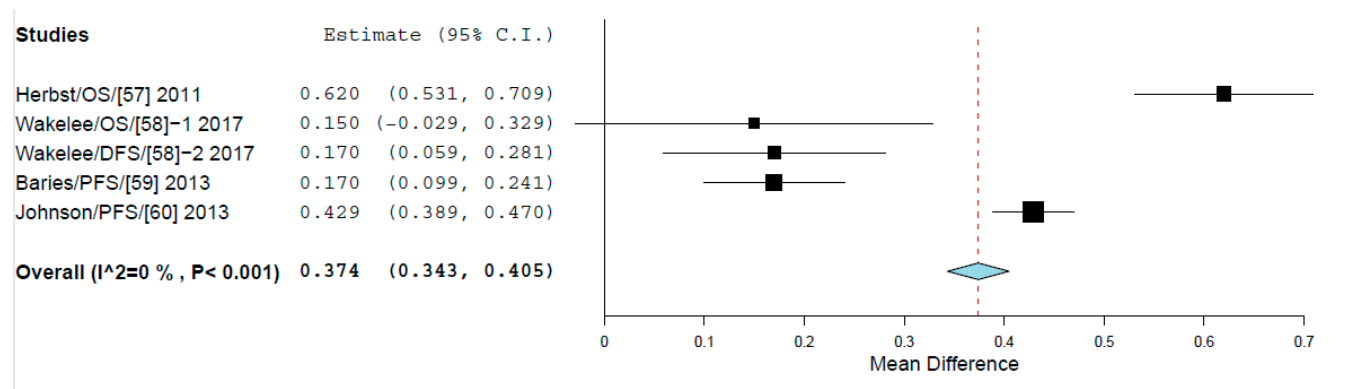

Supplemental Figure s68. Smokers vs non-smokers in response to treatment with drugs of angiogenesis with fixed effect model (FE)

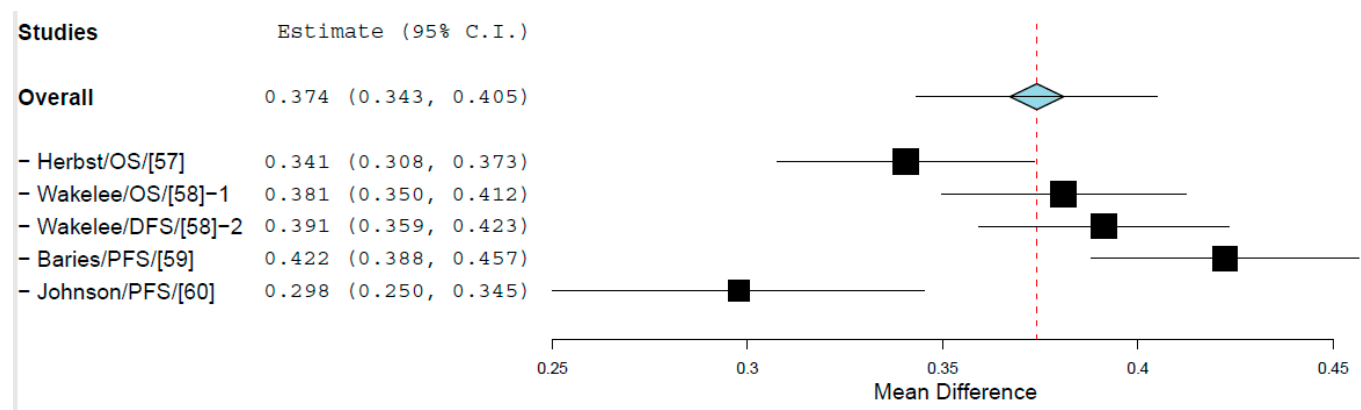

**Supplemental Figure s69.** Smokers vs non-smokers in response to treatment with drugs of angiogenesis with FE leaveoneout model

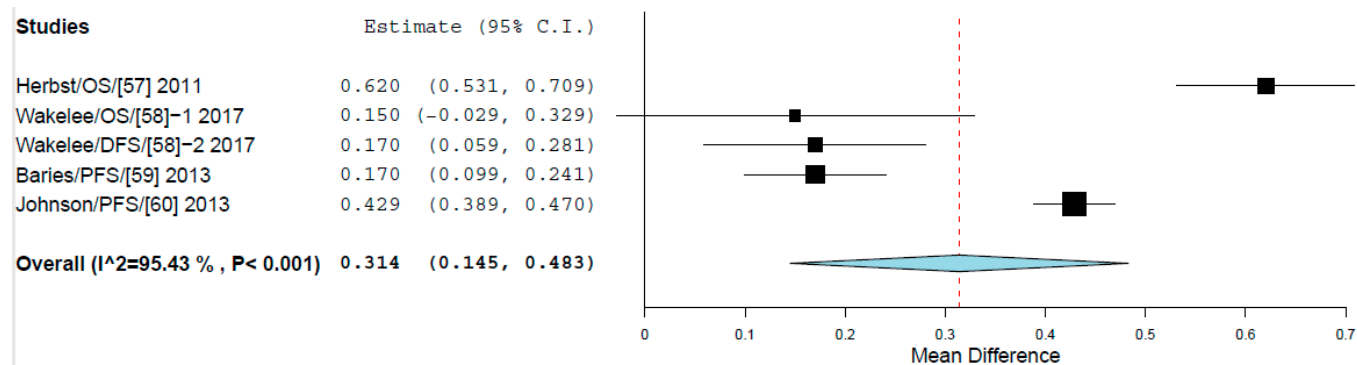

**Supplemental Figure s70.** Smokers vs non-smokers in response to treatment with drugs of angiogenesis with random effect model

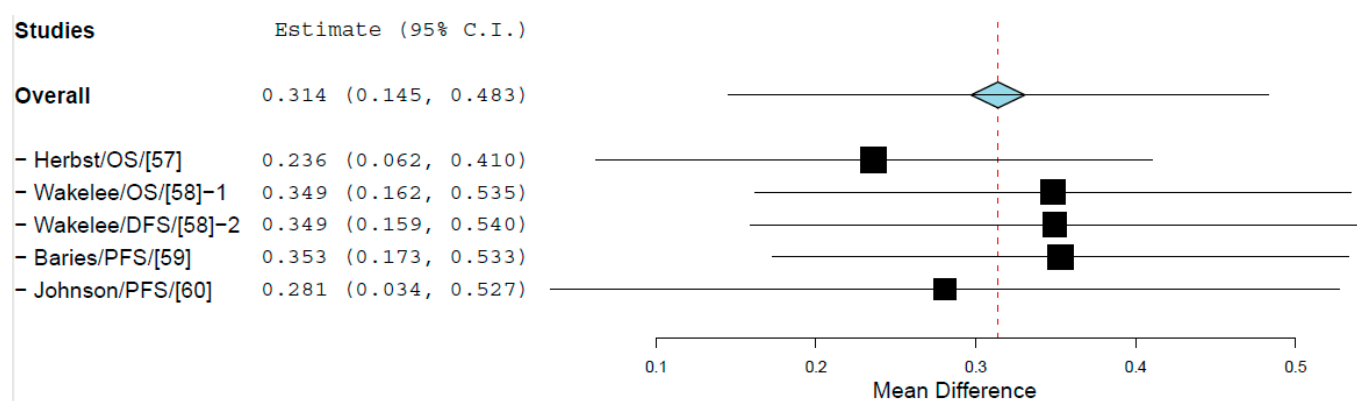

**Supplemental Figure s71.** Smokers vs non-smokers in response to treatment with drugs of angiogenesis with RE leaveoneout model

## Part G. NSCLC Patients response to treatment by drugs targeting BRAF gene and ALK gene

## **G1. Drugs that target cells with BRAF gene changes**

In some NSCLCs, affected cells show changes in the v-raf murine sarcoma viral oncogene homolog b1 (BRAF), Dabrafenib (Tafinlar) and Trametinib (Mekinist)

### **a.Dabrafenib (Tafinlar)**

Thirty publications were found with key words “Dabrafenib phase-III” in the clinical trial category. Eight were found using f “Dabrafenib phase-3” in the clinical trial category. No data on smokers vs non-smokers were found.

### **b. Trametinib (Mekinist)**

Sixteen publications were found with key words “Trametinib phase-III” in the clinical trial category, and nine using “Trametinib phase-3”. No data on smokers vs non-smokers were found.

## **G2. Drugs that target cells with ALK gene changes**

About 5% of NSCLCs show an alteration in the ALK gene. Ceritinib is a next-generation ALK inhibitor. It has shown anti-tumour efficacy with ALK-rearranged in NSCLC. Crizotinib was the first ALK-targeted therapy for patients with ALK-rearranged NSCLC, and it has become the standard of treatment in many areas.

### **a. Crizotinib**

15 publication were found with keywords “Crizotinib phase-III” in the clinical trial category, and nine from “Crizotinib phase-3” in the clinical trial category, which included four reporting HR data for smokers and non-smokers.<sup>61-64</sup> In 3 of 4 studies, the HR value of never smokers was lower than smokers in response to Crizotinib indicating a better response to treatment by non-smokers than non-smokers.

### **b. Ceritinib**

Five publications were found with key words “Ceritinib phase-III” in and three from “Ceritinib phase-3” in the clinical trial category. Two included data for HR from smokers and non-smokers<sup>65, 66</sup> in **Tabulation S7**. Results from the two studies were contradictory indicating the need for more data.

#### **c. Alectinib**

Six publications were found with key words “Alectinib phase-III” and two from “Alectinib phase-3” in the clinical trial category, including two comparing HR for smokers and non-smokers.<sup>67, 68</sup> An updated report was published in July 2019<sup>69</sup> that reported contradictory results.

#### **d. Brigatinib**

Two publications were found with key words “Brigatinib phase-III” and one from “Brigatinib phase-3” in the clinical trial category. One measured HR for smokers and non-smokers, reporting that never smokers showed a lower HR in response to treatment than non-smokers.<sup>70</sup>

#### **e. Lorlatinib**

No publications were found with key words “Lorlatinib phase-III” and only one from “Lorlatinib phase-3” in the clinical trial category. No data on smokers vs non-smokers was found. Although there are few data on individual targeted drugs, no conclusive conclusions can be reached. But as we have summarized thus far, for most drugs used to treat NSCLC, non-smokers responded better than smokers.

### **Meta-analysis of NSCLC patients treated with drugs targeting ALK gene**

We next analyzed separately the HR values from patients treated with drugs targeting the ALK gene (**Tabulation S8**). Together, non-smokers had a mean HR of 0.050 compared to 0.060 for smokers..

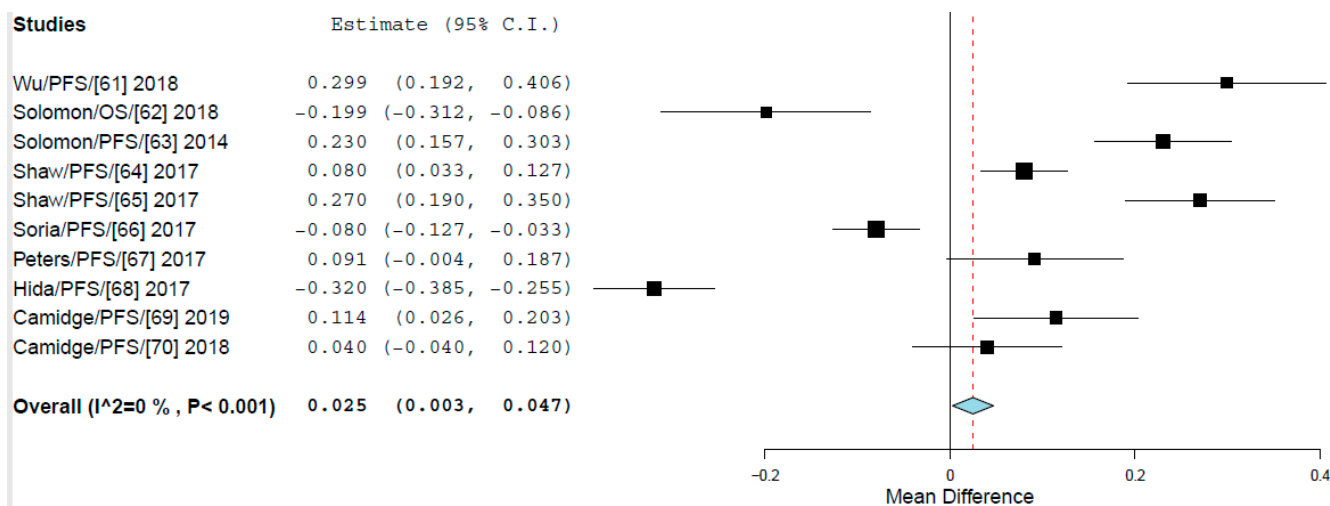

**Supplemental Figure s72.** Smokers vs non-smokers in response to treatment with drugs targeting ALK with fixed effect model (FE)

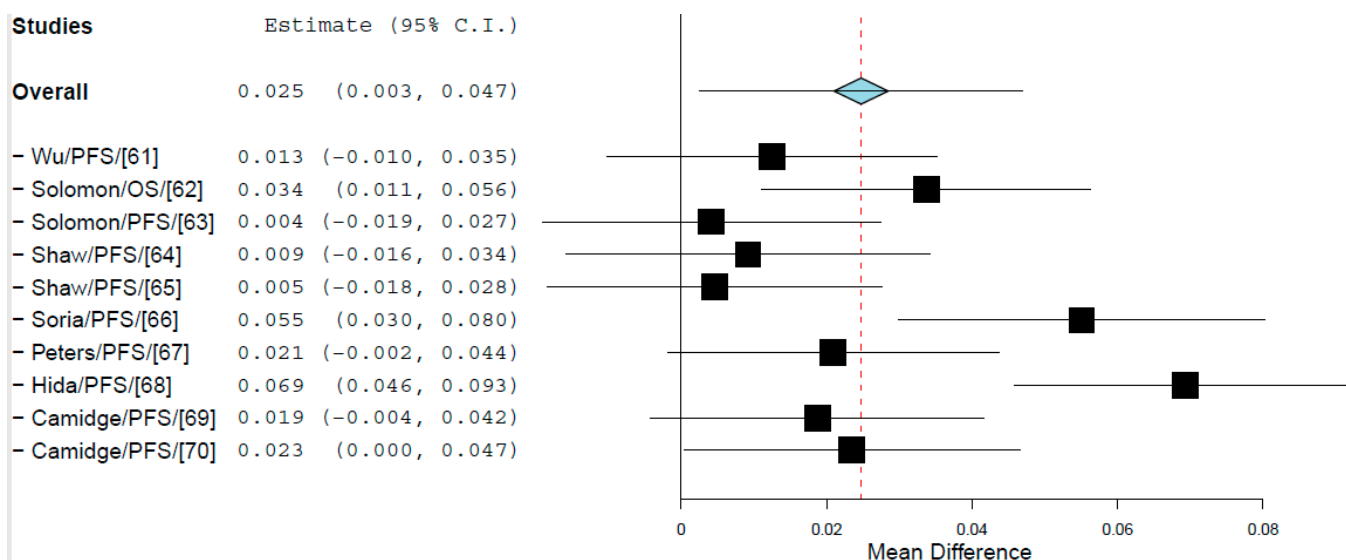

**Supplemental Figure s73.** Smokers vs non-smokers in response to treatment with drugs targeting ALK with FE leaveoneout model

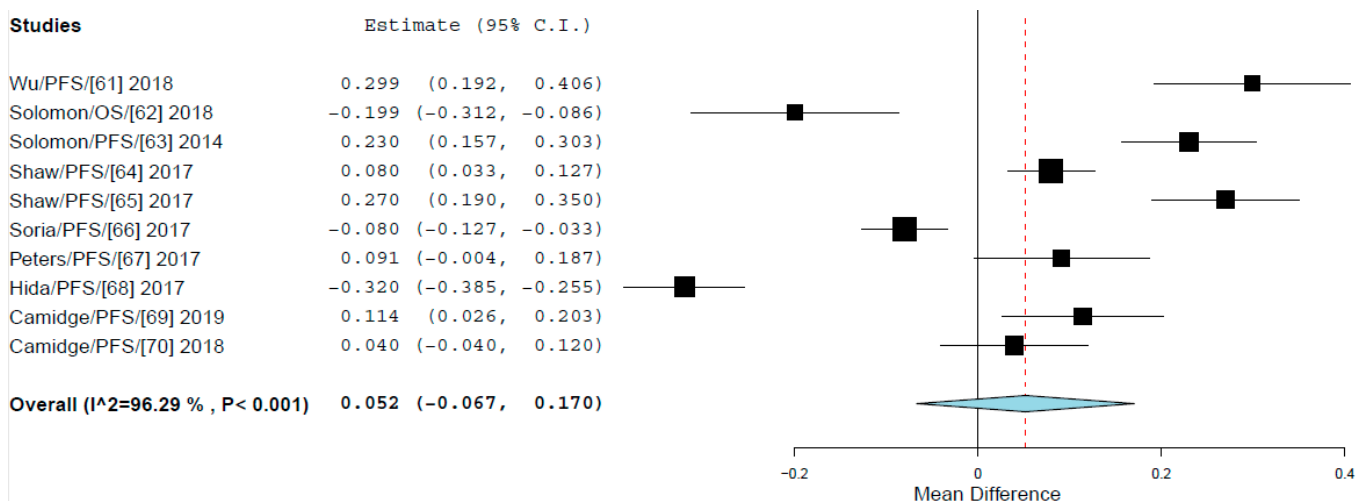

**Supplemental Figure s74.** Smokers vs non-smokers in response to treatment with drugs targeting ALK with random effect model (RE)

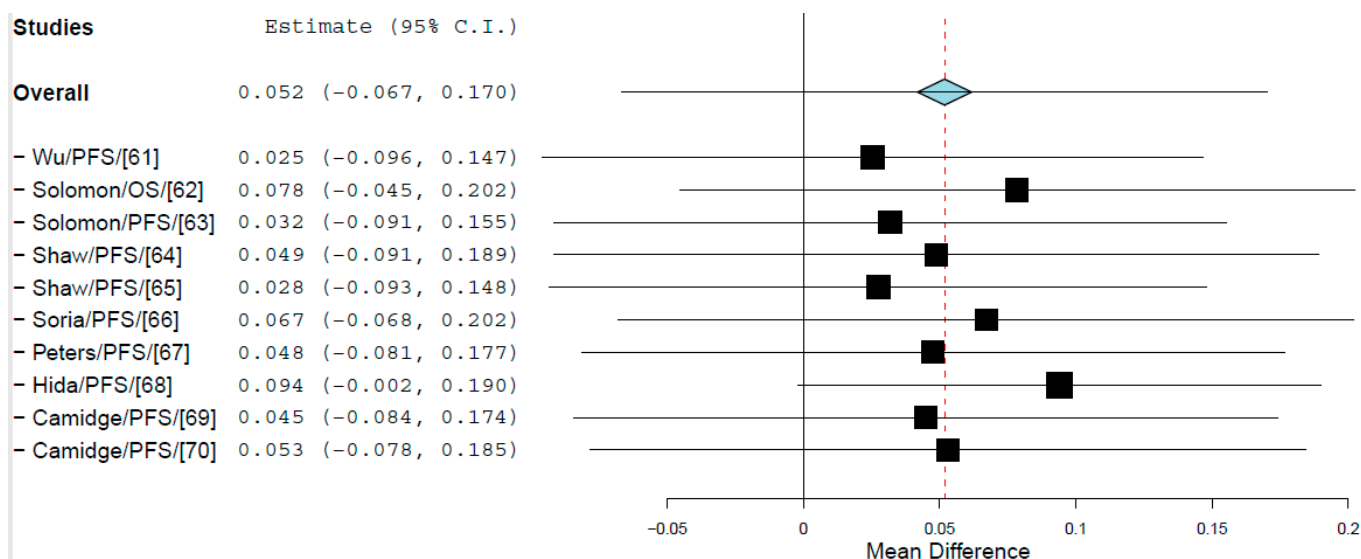

**Supplemental Figure s75.** Smokers vs non-smokers in response to treatment with drugs targeting ALK with RE leaveoneout model

## PART H. Summary of meta-analysis on response to treatment of NSCLC patients to all other drugs



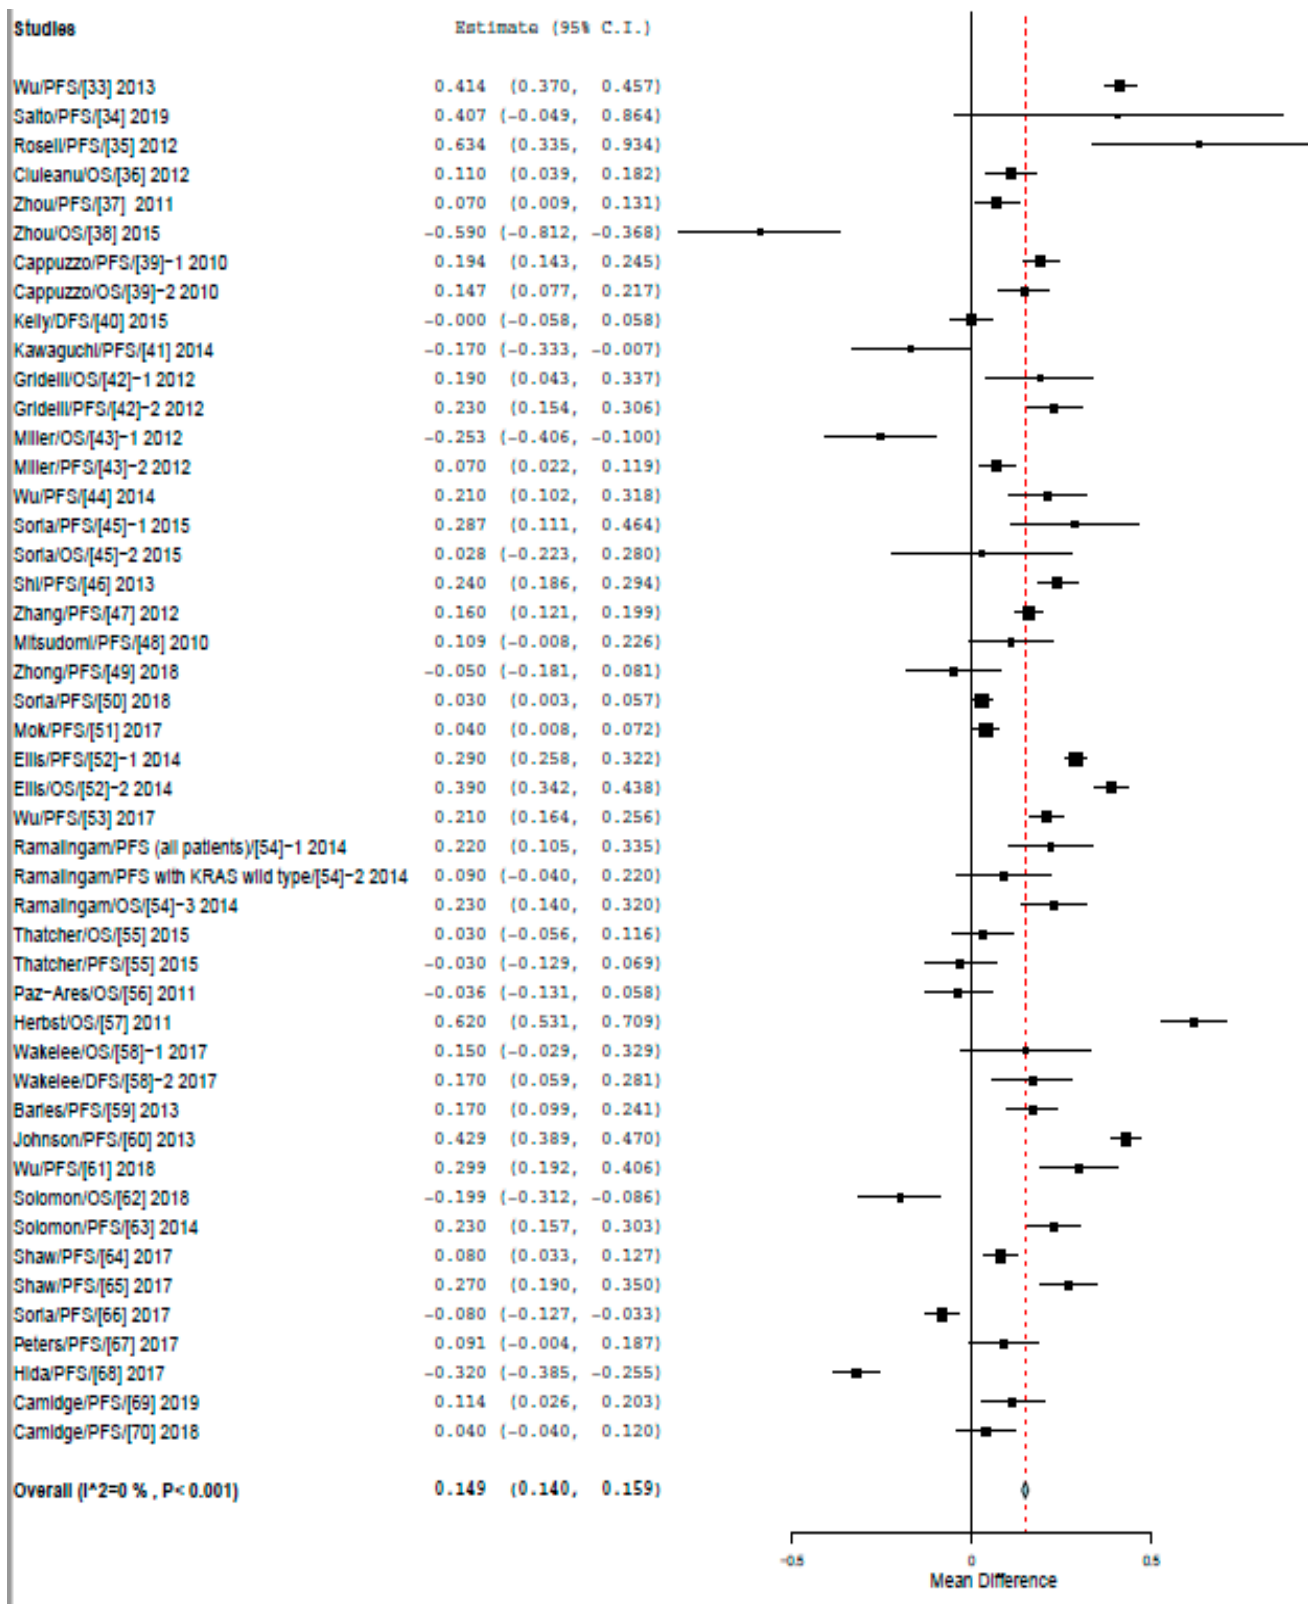

**Supplemental Figure s76.** Smokers vs non-smokers in response to treatment with all other drugs among NSCLC patients with fixed effect model (FE) of meta-analysis

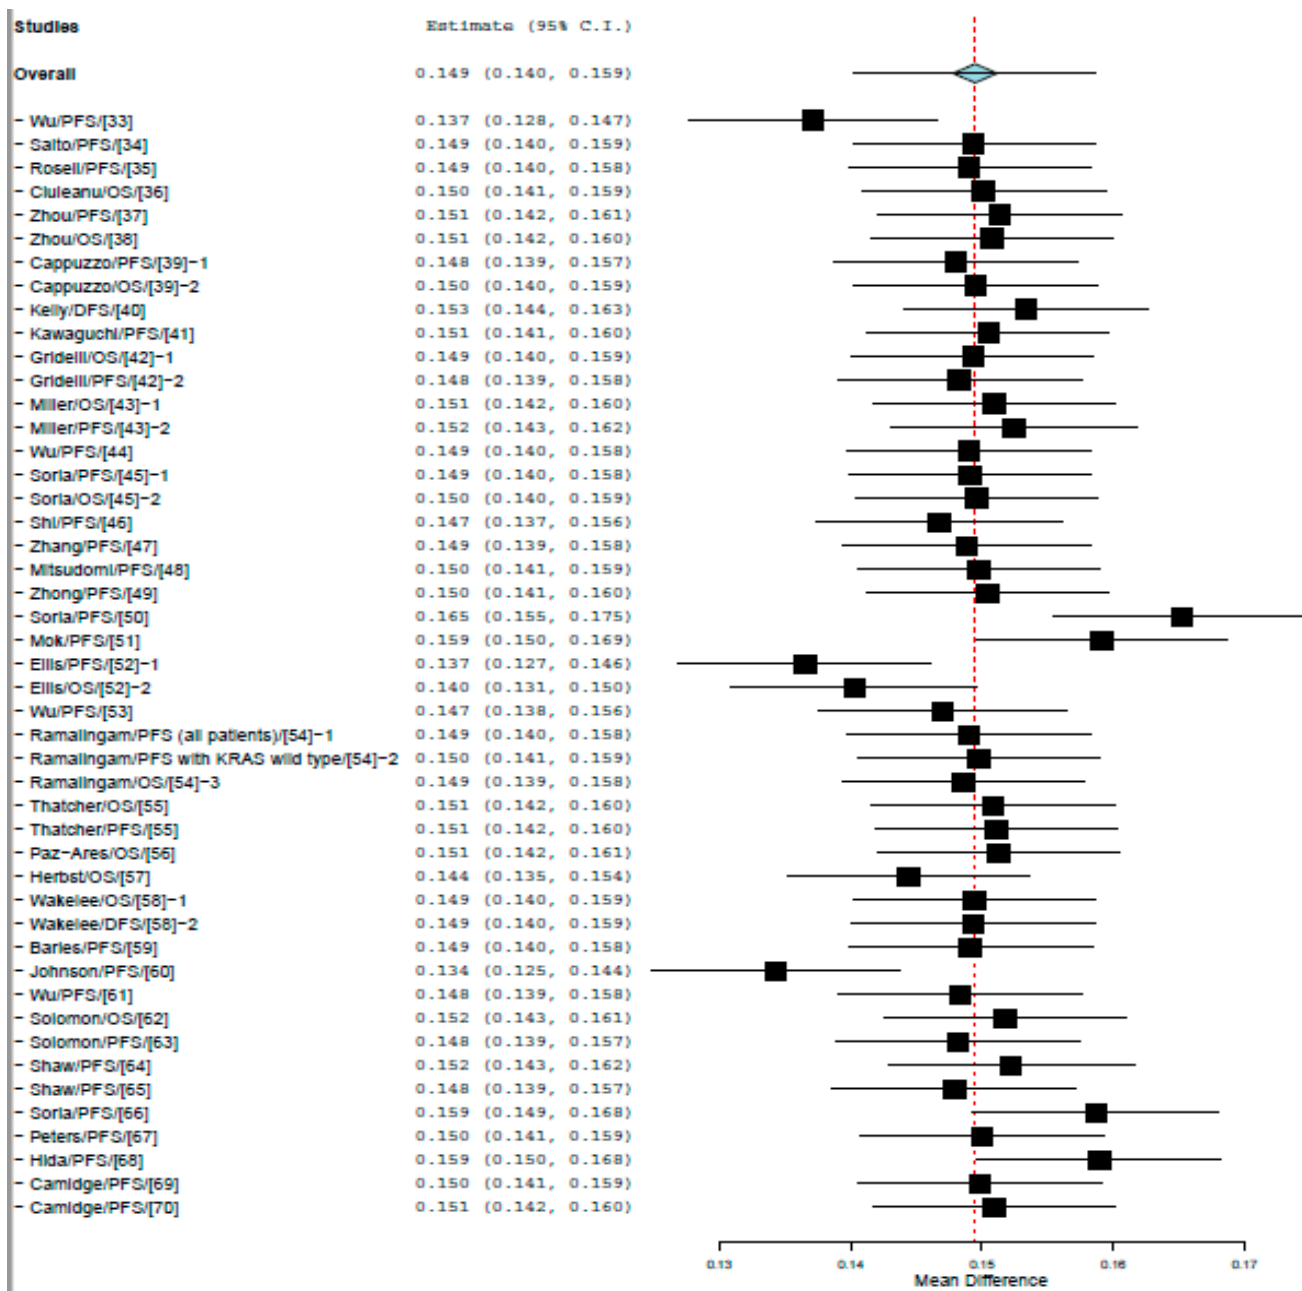

**Supplemental Figure s77.** Smokers vs non-smokers in response to treatment with all other drugs among NSCLC patients with FE leaveoneout model of meta-analysis

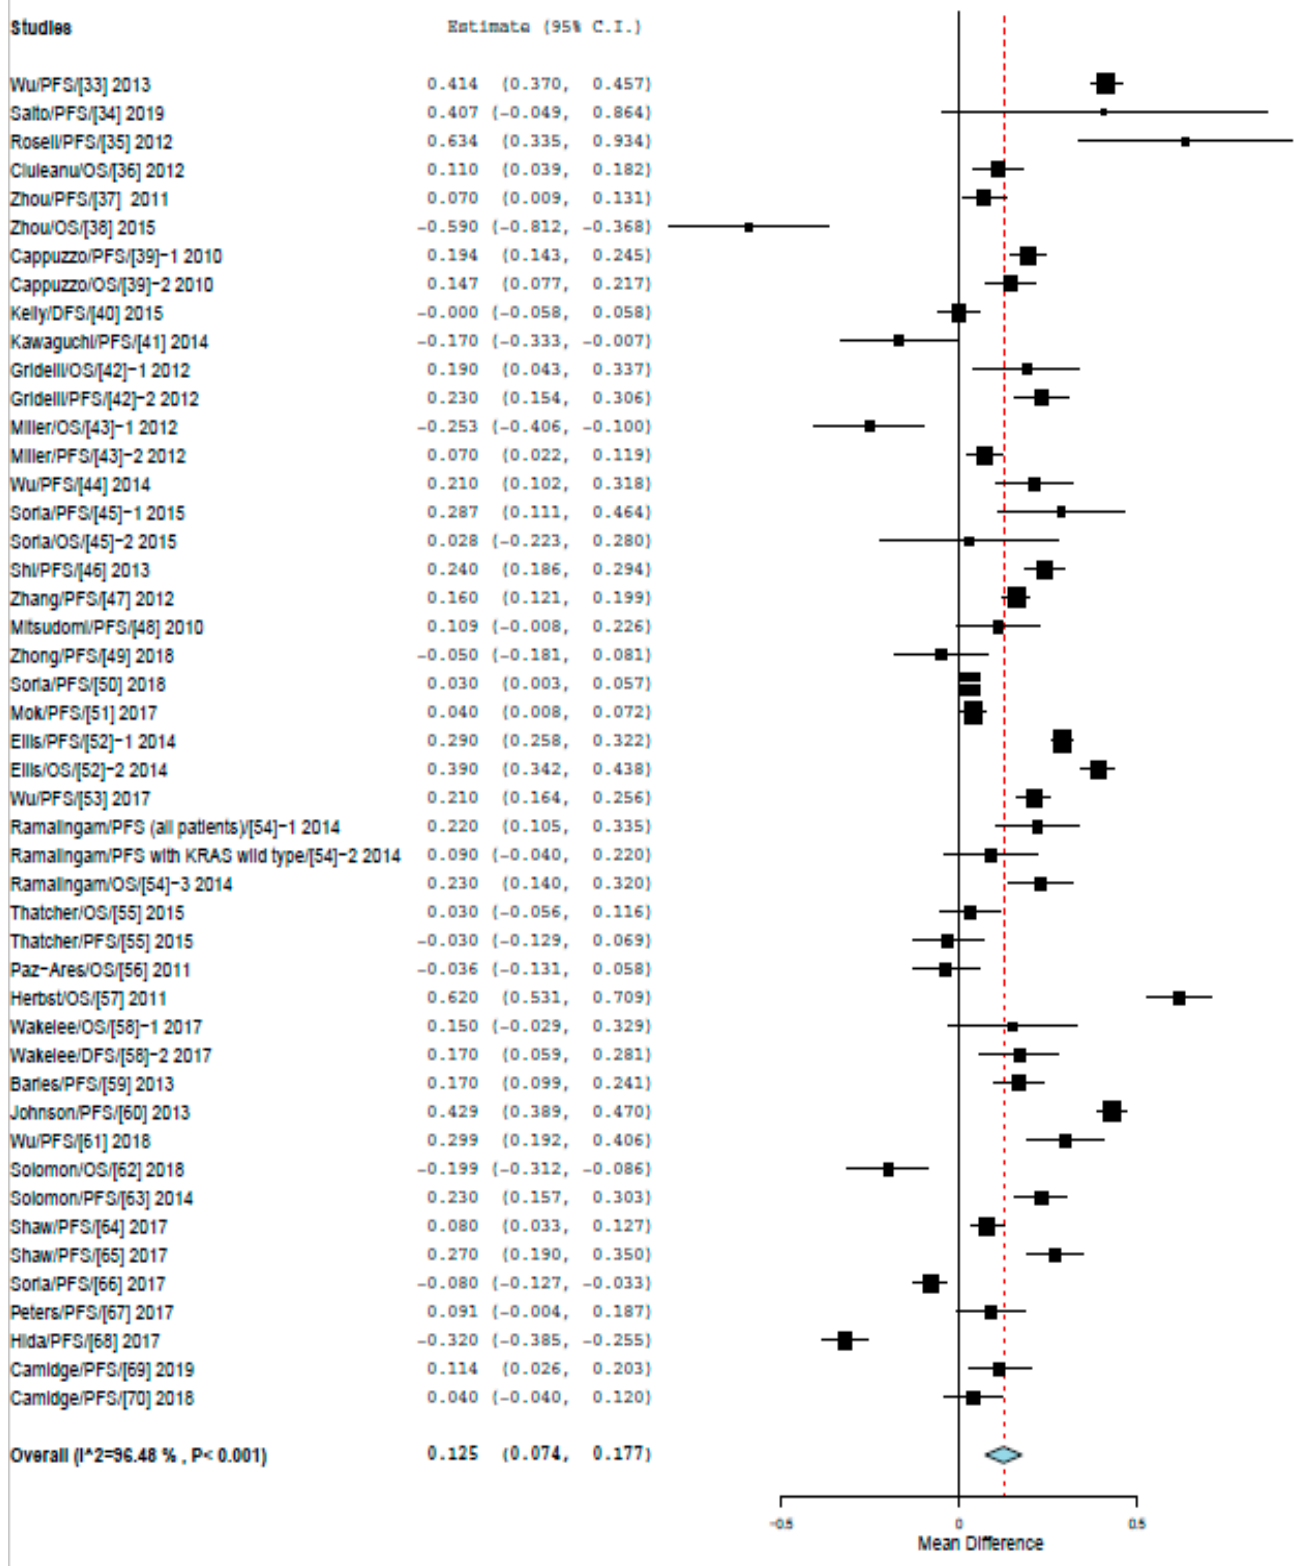

**Supplemental Figure s78.** Smokers vs non-smokers in response to treatment with all other drugs among NSCLC patients with random modle of meta-analysis

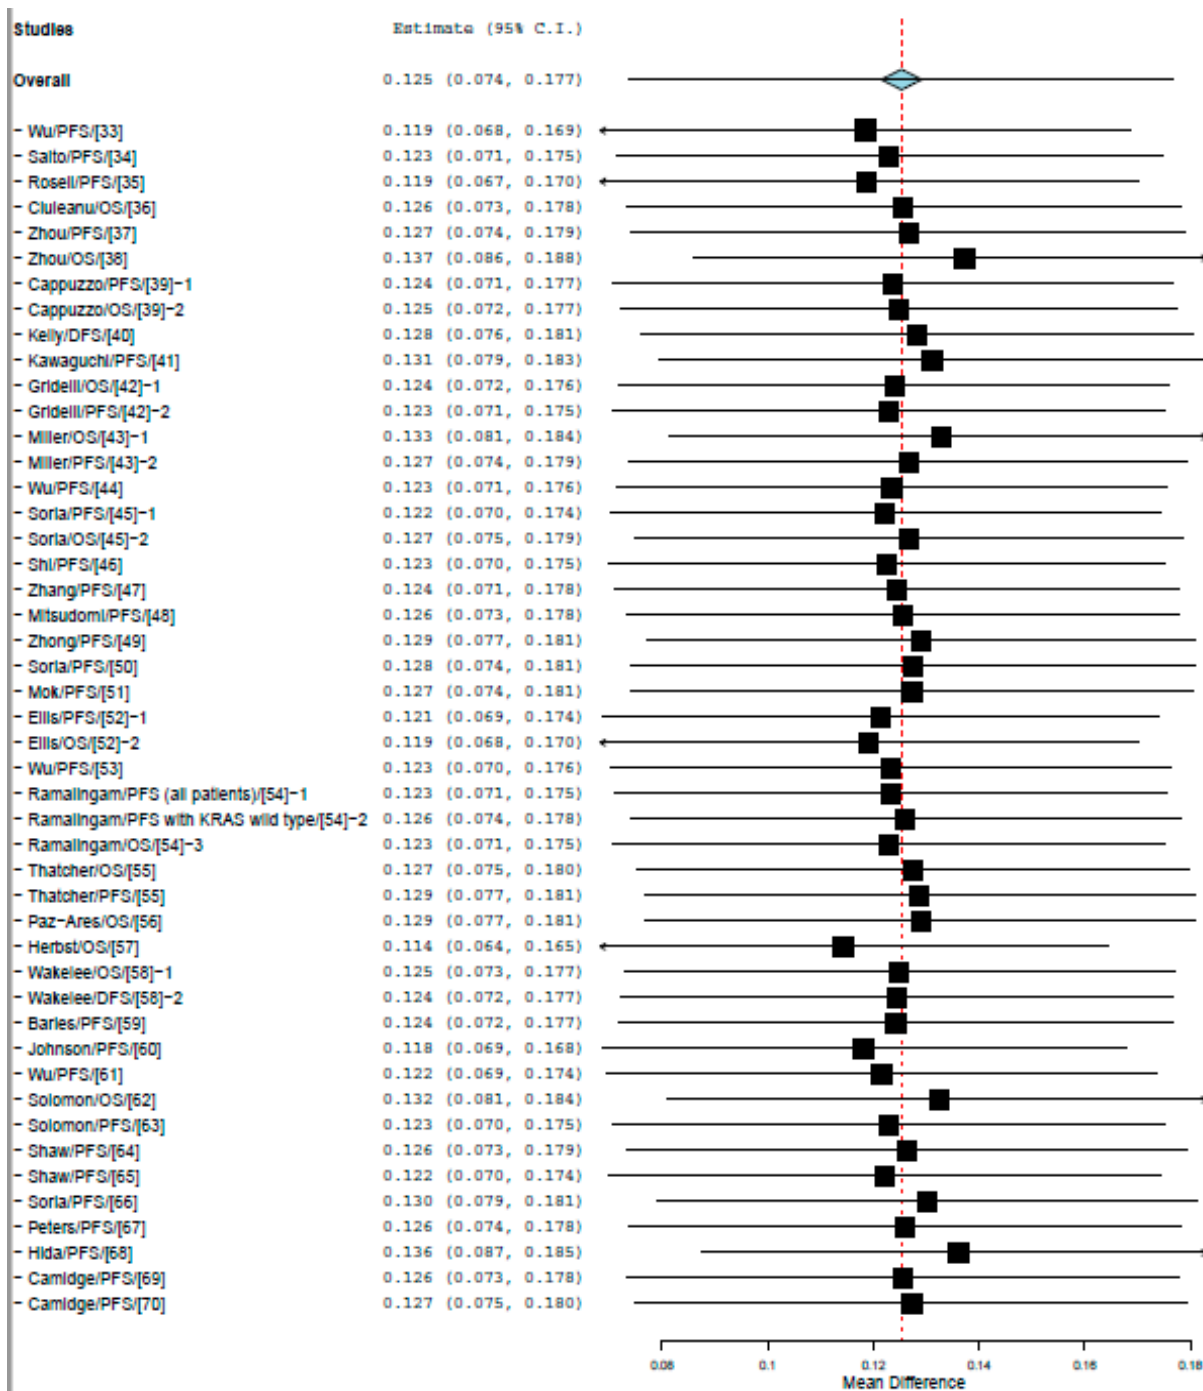

**Supplemental Figure s79.** Smokers vs non-smokers in response to treatment with all other drugs among NSCLC patients with RE leaveoneout model of meta-analysis

## **PART I. Response to treatment by smokers and nonsmokers treated with Anti-PD-1 PD-L1 drugs in other cancers**

### **1. Response to treatment by pembrolizumab in other cancer patient populations**

A total of 17 publications were obtained by searching with key words “Pembrolizumab phase-3” from the article type of “clinical trial”.<sup>71,72</sup> After excluding NSCLC, ten publications were obtained for clinical trials for six cancers, including renal (2), head-and-neck, gastric or gastro-esophageal, hepatocellular carcinoma, melanoma (3), and urothelial

### **2. Application of nivolumab in other cancers**

A total of 23 publications were obtained by searching with key words “nivolumab phase-3” from the article type of “clinical trial”. Twelve publications were for four other types of cancers, melanoma (5), renal (4), gastric or gastro-oesophageal junction, and head and neck. Smoking status was reported in the study of head and neck cancer. Unlike the data from the pembrolizuma, the HR for OS in non-smokers was lower than that of smokers.<sup>73, 74</sup> These data seem to contradict previous results from other trials, however, the drug was used to treat recurrent or metastatic squamous-cell carcinoma of the head and neck after platinum chemotherapy. Thus, it was not used as the first line of treatment and was limited to a small proportion of PD-L1 positive patients (73 out of 361). In addition, because the investigators analyzed all the smokers together, it is not clear whether the current smokers have a lower HR than non-smokers.

A total of 37 publications were obtained by searching with key words “nivolumab phase-III” from the article type of “clinical trial”. One additional study was found for the treatment of melanoma that did not include smoking status data.

### **3. Application of atezolizumab in other cancers**

A total of seven publications were obtained by searching with key words “atezolizumab phase-3” from the article type of “clinical trial”. Excluding NSCLC, one publication for breast cancer was identified but smoking status was not provided.

A total of eight publications were obtained by searching with key words “atezolizumab phase-III” from the article type of “clinical trial”. One publication for urothelial carcinoma was identified reporting smoking status <sup>75</sup>. Again, current smokers had a lower mean HR than non-smokers (**Tabulation S7 in Supplementary**).

#### **4. Application of avelumab in other cancers**

A total of four publications were obtained by searching with key words “Avelumab phase-3” from the article type of “clinical trial”. Two publications for renal-cell carcinoma were identified but only one reported smoking status. Again, mean HR of smokers was lower than that of non-smokers <sup>76</sup>.

A total of three publications were obtained by searching with key words “Avelumab phase-III” from the article type of “clinical trial”. No additional qualified studies were found.

#### **5. Application of durvalumab in other cancers**

A total of three publications were obtained by searching with key words “Durvalumab phase-3” from the article type of “clinical trial”. No qualifying study was found. Five publications were obtained by searching with key words “Durvalumab phase-III” from the article type of “clinical trial”. Again, no qualifying study was found.

The available data from these four trials support the hypothesis that smokers, most likely current smokers, have a lower HR than non-smokers when cancer patients are treated anti PD-1 and PD-L1 drugs. Results for Durvalumab were not apparent. It is not clear when it was used alone or as a first-line of treatment in these studies, or whether smokers respond better than non-smokers. Surprisingly, smokers responded better than non-smokers among patients with other types of cancer when treated with anti-PD-1 Drugs and anti-PD-L1 drugs

### **Part J. Response to treatment by smokers and nonsmokers to other drugs in patients of other cancers**

## **1. EGFR inhibitors used in other cancers with EGFR gene mutations**

### **a. Erlotinib (Tarceva)**

Among 140 publications obtained by searching with key words “Erlotinib phase-III” for clinical trials, one study provided the HR values of smokers and non-smokers in the treatment of advanced hepatocellular carcinoma with sorafenib plus erlotinib <sup>77</sup>. Twenty-nine publications were identified when searching with key words “Erlotinib phase-3” (**Tabulation S8 in Supplementary**).

### **b. Afatinib (Gilotrif)**

A total of 140 publications were obtained by searching with key words “Afatinib phase-3”, for clinical trials, and 33 publications using Afatinib phase-III’ <sup>78</sup> (**Tabulation S8 in Supplementary**).

### **c. Gefitinib (Iressa)**

A total of 20 publications were obtained by searching with key words “Gefitinib phase-3” for clinical trials, and 88 publications using key words “Gefitinib phase-III” <sup>79</sup> (**Tabulation S8 in Supplementary**).

### **d. Osimertinib (Tagrisso)**

No data were found.

### **e. Necitumumab (Portrazza)**

No data were identified.

## **2. Drugs that target tumor blood vessel growth (angiogenesis)**

### **a. Bevacizumab (Avastin)**

Among five publications obtained by searching with key words “Bevacizumab phase-III smoking”, for clinical trials, only one disease that was not NSCLC (pleural mesothelioma) was reported <sup>80</sup> (**Tabulation S8 in**

Supplementary).

#### b. Ramucirumab (Cyramza)

Among 37 publications obtained by searching with key words “Ramucirumab phase-III”, for clinical trials, none provided any data on smokers vs. non-smokers.

### 3. Drugs that cells with ALK gene changes

No data on cancers other than NSCLC.

**Tabulation S8.** HR of smokers and non-smokers of other cancers treated with other Drugs

| Drugs     | Study (First Author)/drug/analytic Metrix                                      | PD-L1 Positive HR | PD-L1 negative HR | Current/ #Patients                   | Former/ # Patients     | Never/# Patients          | Overall/ #Patient s    |
|-----------|--------------------------------------------------------------------------------|-------------------|-------------------|--------------------------------------|------------------------|---------------------------|------------------------|
| Erlotinib | Zhu/ OS/sorafenib plus erlotinib/ advanced hepatocellular carcinoma [77]       |                   |                   | 0.876(0.645-1.191)/241               | 0.985(0.724-1.334)/260 | 0.995(0.713-1.387)/219    | 0.929(0.781-1.106)/720 |
| Afatinib  | Machiels /Afatinib versus methotrexate as second-line / Head and Neck/PFS [78] |                   |                   | >=10 pack/year 0.71 (0.56-0.90) /381 |                        | <10 pack/year 1.05 (0.66- | 0.80(0.65 - 0.98)/483  |



|             |                                                                                 |   |  |                                                       |                                      |                                 |                                 |
|-------------|---------------------------------------------------------------------------------|---|--|-------------------------------------------------------|--------------------------------------|---------------------------------|---------------------------------|
|             |                                                                                 |   |  |                                                       |                                      | 1.70)<br>/87                    |                                 |
| Gefitinib   | Argiris/OS / of docetaxel with or without gefitinib / head and neck cancer [79] |   |  | >40<br>packs/ye<br>ar/0.87(0<br>.59-<br>1.29)/10<br>3 | <=40/0.9<br>6(0.64-<br>1.44)/13<br>1 |                                 | 0.93(0.72<br>-<br>1.21)/23<br>9 |
| Bevacizumab | Zalcman/OS/ pleural mesothelioma [80]                                           | - |  | 0.81(0.61-1.08)/254                                   |                                      | 0.73(0.5<br>3-<br>1.02)/19<br>4 | 0.77(0.62<br>-<br>0.95)/34<br>8 |

#### Supplemental Tabulation s9. Reference in the supplemental materials

| Ref. No. | First Author | References                                                                                                                                                                                                                                                                             |
|----------|--------------|----------------------------------------------------------------------------------------------------------------------------------------------------------------------------------------------------------------------------------------------------------------------------------------|
| 2        | Barlesi      | Barlesi F, Vansteenkiste J, Spigel D, et al. Avelumab versus docetaxel in patients with platinum-treated advanced non-small-cell lung cancer (JAVELIN Lung 200): an open-label, randomised, phase 3 study. <i>Lancet Oncol.</i> 2018;19(11):1468-1479.                                 |
| 4        | Mok          | Mok TSK, Wu YL, Kudaba I, et al. Pembrolizumab versus chemotherapy for previously untreated, PD-L1-expressing, locally advanced or metastatic non-small-cell lung cancer (KEYNOTE-042): a randomised, open-label, controlled, phase 3 trial. <i>Lancet.</i> 2019;393(10183):1819-1830. |
| 20       | Reck         | Reck M, Rodriguez-Abreu D, Robinson AG, et al. Pembrolizumab versus Chemotherapy for PD-L1-Positive Non-Small-Cell Lung Cancer. <i>N Engl J Med.</i> 2016;375(19):1823-1833.                                                                                                           |
| 21       | Gandhi       | Gandhi L, Rodriguez-Abreu D, Gadgeel S, et al. Pembrolizumab plus Chemotherapy in Metastatic Non-Small-Cell Lung Cancer. <i>N Engl J Med.</i> 2018;378(22):2078-2092.                                                                                                                  |
| 24       | Borghaei     | Borghaei H, Paz-Ares L, Horn L, et al. Nivolumab versus Docetaxel in Advanced Nonsquamous Non-Small-Cell Lung Cancer. <i>N Engl J Med.</i> 2015;373(17):1627-1639.                                                                                                                     |
| 28       | Socinski     | Socinski MA, Jotte RM, Cappuzzo F, et al. Atezolizumab for First-Line Treatment of Metastatic Nonsquamous NSCLC. <i>N Engl J Med.</i> 2018;378(24):2288-2301.                                                                                                                          |

|    |           |                                                                                                                                                                                                                                                                                                                                                  |
|----|-----------|--------------------------------------------------------------------------------------------------------------------------------------------------------------------------------------------------------------------------------------------------------------------------------------------------------------------------------------------------|
| 29 | Rittmeyer | Rittmeyer A, Barlesi F, Waterkamp D, et al. Atezolizumab versus docetaxel in patients with previously treated non-small-cell lung cancer (OAK): a phase 3, open-label, multicentre randomised controlled trial. <i>Lancet</i> . 2017;389(10066):255-265.                                                                                         |
| 30 | West      | West H, McCleod M, Hussein M, et al. Atezolizumab in combination with carboplatin plus nab-paclitaxel chemotherapy compared with chemotherapy alone as first-line treatment for metastatic non-squamous non-small-cell lung cancer (IMpower130): a multicentre, randomised, open-label, phase 3 trial. <i>Lancet Oncol</i> . 2019;20(7):924-937. |
| 31 | Antonia   | Antonia SJ, Villegas A, Daniel D, et al. Durvalumab after Chemoradiotherapy in Stage III Non-Small-Cell Lung Cancer. <i>N Engl J Med</i> . 2017;377(20):1919-1929.                                                                                                                                                                               |
| 32 | Antonia   | Antonia SJ, Villegas A, Daniel D, et al. Overall Survival with Durvalumab after Chemoradiotherapy in Stage III NSCLC. <i>N Engl J Med</i> . 2018;379(24):2342-2350.                                                                                                                                                                              |
| 33 | Wu        | Wu YL, Lee JS, Thongprasert S, et al. Intercalated combination of chemotherapy and erlotinib for patients with advanced stage non-small-cell lung cancer (FASTACT-2): a randomised, double-blind trial. <i>Lancet Oncol</i> . 2013;14(8):777-786.                                                                                                |
| 34 | Saito     | Saito H, Fukuhara T, Furuya N, et al. erlotinib plus bevacizumab versus erlotinib alone in patients with EGFR-positive advanced non-squamous non-small-cell lung cancer (NEJ026): interim analysis of an open-label, randomised, multicentre, phase 3 trial. <i>Lancet Oncol</i> . 2019;20(5):625-635.                                           |
| 35 | Rosell    | Rosell R, Carcereny E, Gervais R, et al. erlotinib versus standard chemotherapy as first-line treatment for European patients with advanced EGFR mutation-positive non-small-cell lung cancer (EURTAC): a multicentre, open-label, randomised phase 3 trial. <i>The Lancet Oncology</i> . 2012;13(3):239-246.                                    |
| 36 | Ciuleanu  | Ciuleanu T, Stelmakh L, Cienas S, et al. Efficacy and safety of erlotinib versus chemotherapy in second-line treatment of patients with advanced, non-small-cell lung cancer with poor prognosis (TITAN): a randomised multicentre, open-label, phase 3 study. <i>Lancet Oncol</i> . 2012;13(3):300-308.                                         |
| 37 | Zhou      | Zhou C, Wu Y-L, Chen G, et al. erlotinib versus chemotherapy as first-line treatment for patients with advanced EGFR mutation-positive non-small-cell lung cancer (OPTIMAL, CTONG-0802): a multicentre, open-label, randomised, phase 3 study. <i>The Lancet Oncology</i> . 2011;12(8):735-742.                                                  |
| 38 | Zhou      | Zhou C, Wu Y, Chen G, et al. Final overall survival results from a randomised, phase III study of erlotinib versus chemotherapy as first-line treatment of EGFR mutation-positive advanced non-small-cell lung cancer (OPTIMAL, CTONG-0802). <i>Annals of Oncology</i> . 2015;26(9):1877-1883.                                                   |
| 39 | Cappuzzo  | Cappuzzo F, Ciuleanu T, Stelmakh L, et al. erlotinib as maintenance treatment in advanced non-small-cell lung cancer: a multicentre, randomised, placebo-controlled phase 3 study. <i>The Lancet Oncology</i> . 2010;11(6):521-529.                                                                                                              |
| 40 | Kelly     | Kelly K, Altorki NK, Eberhardt WE, et al. Adjuvant erlotinib Versus Placebo in Patients With Stage IB-IIIA Non-Small-Cell Lung Cancer (RADIANT): A Randomized, Double-Blind, Phase III Trial. <i>J Clin Oncol</i> . 2015;33(34):4007-4014.                                                                                                       |
| 41 | Kawaguchi | Kawaguchi T, Ando M, Asami K, et al. Randomized phase III trial of erlotinib versus docetaxel as second- or third-line therapy in patients with advanced non-small-cell lung cancer: Docetaxel and erlotinib Lung Cancer Trial (DELTA). <i>J Clin Oncol</i> . 2014;32(18):1902-1908.                                                             |
| 42 | Gridelli  | Gridelli C, Ciardiello F, Gallo C, et al. First-line erlotinib followed by second-line cisplatin-gemcitabine chemotherapy in advanced non-small-cell lung cancer: the TORCH randomized trial. <i>J Clin Oncol</i> . 2012;30(24):3002-3011.                                                                                                       |
| 43 | Miller    | Miller VA, Hirsh V, Cadranel J, et al. Afatinib versus placebo for patients with advanced, metastatic non-small-cell lung cancer after failure of erlotinib, Gefitinib, or both, and one or two lines of chemotherapy (LUX-Lung 1): a phase 2b/3 randomised trial. <i>Lancet Oncol</i> . 2012;13(5):528-538.                                     |

|    |            |                                                                                                                                                                                                                                                                                                                      |
|----|------------|----------------------------------------------------------------------------------------------------------------------------------------------------------------------------------------------------------------------------------------------------------------------------------------------------------------------|
| 44 | Wu         | Wu YL, Zhou C, Hu CP, et al. Afatinib versus cisplatin plus gemcitabine for first-line treatment of Asian patients with advanced non-small-cell lung cancer harbouring EGFR mutations (LUX-Lung 6): an open-label, randomised phase 3 trial. <i>Lancet Oncol.</i> 2014;15(2):213-222.                                |
| 45 | Soria      | Soria J-C, Felip E, Cobo M, et al. Afatinib versus erlotinib as second-line treatment of patients with advanced squamous cell carcinoma of the lung (LUX-Lung 8): an open-label randomised controlled phase 3 trial. <i>The Lancet Oncology.</i> 2015;16(8):897-907.                                                 |
| 46 | Shi        | Shi Y, Zhang L, Liu X, et al. Icotinib versus Gefitinib in previously treated advanced non-small-cell lung cancer (ICOGEN): a randomised, double-blind phase 3 non-inferiority trial. <i>Lancet Oncol.</i> 2013;14(10):953-961.                                                                                      |
| 47 | Zhang      | Zhang L, Ma S, Song X, et al. Gefitinib versus placebo as maintenance therapy in patients with locally advanced or metastatic non-small-cell lung cancer (INFORM; C-TONG 0804): a multicentre, double-blind randomised phase 3 trial. <i>The Lancet Oncology.</i> 2012;13(5):466-475.                                |
| 48 | Mitsudomi  | Mitsudomi T, Morita S, Yatabe Y, et al. Gefitinib versus cisplatin plus docetaxel in patients with non-small-cell lung cancer harbouring mutations of the epidermal growth factor receptor (WJTOG3405): an open label, randomised phase 3 trial. <i>Lancet Oncol.</i> 2010;11(2):121-128.                            |
| 49 | Zhong      | Zhong W-Z, Wang Q, Mao W-M, et al. Gefitinib versus vinorelbine plus cisplatin as adjuvant treatment for stage II–IIIA (N1–N2) EGFR-mutant NSCLC (ADJUVANT/CTONG1104): a randomised, open-label, phase 3 study. <i>The Lancet Oncology.</i> 2018;19(1):139-148.                                                      |
| 50 | Soria      | Soria JC, Ohe Y, Vansteenkiste J, et al. Osimertinib in Untreated EGFR-Mutated Advanced Non-Small-Cell Lung Cancer. <i>N Engl J Med.</i> 2018;378(2):113-125.                                                                                                                                                        |
| 51 | Mok        | Mok TS, Wu YL, Ahn MJ, et al. Osimertinib or Platinum-Pemetrexed in EGFR T790M-Positive Lung Cancer. <i>N Engl J Med.</i> 2017;376(7):629-640.                                                                                                                                                                       |
| 52 | Ellis      | Ellis PM, Shepherd FA, Millward M, et al. Dacomitinib compared with placebo in pretreated patients with advanced or metastatic non-small-cell lung cancer (NCIC CTG BR.26): a double-blind, randomised, phase 3 trial. <i>Lancet Oncol.</i> 2014;15(12):1379-1388.                                                   |
| 53 | Wu         | Wu Y-L, Cheng Y, Zhou X, et al. Dacomitinib versus Gefitinib as first-line treatment for patients with EGFR-mutation-positive non-small-cell lung cancer (ARCHER 1050): a randomised, open-label, phase 3 trial. <i>The Lancet Oncology.</i> 2017;18(11):1454-1466.                                                  |
| 54 | Ramalingam | Ramalingam SS, Janne PA, Mok T, et al. Dacomitinib versus erlotinib in patients with advanced-stage, previously treated non-small-cell lung cancer (ARCHER 1009): a randomised, double-blind, phase 3 trial. <i>Lancet Oncol.</i> 2014;15(12):1369-1378.                                                             |
| 55 | Thather    | Thatcher N, Hirsch FR, Luft AV, et al. Necitumumab plus gemcitabine and cisplatin versus gemcitabine and cisplatin alone as first-line therapy in patients with stage IV squamous non-small-cell lung cancer (SQUIRE): an open-label, randomised, controlled phase 3 trial. <i>Lancet Oncol.</i> 2015;16(7):763-774. |
| 56 | Paz-Ares   | Paz-Ares L, Mezger J, Ciuleanu TE, et al. Necitumumab plus pemetrexed and cisplatin as first-line therapy in patients with stage IV non-squamous non-small-cell lung cancer (INSPIRE): an open-label, randomised, controlled phase 3 study. <i>The Lancet Oncology.</i> 2015;16(3):328-337.                          |
| 57 | Herbst     | Herbst RS, Ansari R, Bustin F, et al. Efficacy of bevacizumab plus erlotinib versus erlotinib alone in advanced non-small-cell lung cancer after failure of standard first-line chemotherapy (BeTa): a double-blind, placebo-controlled, phase 3 trial. <i>Lancet.</i> 2011;377(9780):1846-1854.                     |

|    |          |                                                                                                                                                                                                                                                                                                                                                  |
|----|----------|--------------------------------------------------------------------------------------------------------------------------------------------------------------------------------------------------------------------------------------------------------------------------------------------------------------------------------------------------|
| 58 | Wakelee  | Wakelee HA, Dahlberg SE, Keller SM, et al. Adjuvant chemotherapy with or without bevacizumab in patients with resected non-small-cell lung cancer (E1505): an open-label, multicentre, randomised, phase 3 trial. <i>The Lancet Oncology</i> . 2017;18(12):1610-1623.                                                                            |
| 59 | Barlesi  | Barlesi F, Scherpereel A, Rittmeyer A, et al. Randomized phase III trial of maintenance bevacizumab with or without pemetrexed after first-line induction with bevacizumab, cisplatin, and pemetrexed in advanced nonsquamous non-small-cell lung cancer: AVAPERL (MO22089). <i>J Clin Oncol</i> . 2013;31(24):3004-3011.                        |
| 60 | Johnson  | Johnson BE, Kabbinavar F, Fehrenbacher L, et al. ATLAS: randomized, double-blind, placebo-controlled, phase IIIB trial comparing bevacizumab therapy with or without erlotinib, after completion of chemotherapy, with bevacizumab for first-line treatment of advanced non-small-cell lung cancer. <i>J Clin Oncol</i> . 2013;31(31):3926-3934. |
| 61 | Wu       | Wu YL, Lu S, Lu Y, et al. Results of PROFILE 1029, a Phase III Comparison of First-Line Crizotinib versus Chemotherapy in East Asian Patients with ALK-Positive Advanced Non-Small Cell Lung Cancer. <i>J Thorac Oncol</i> . 2018;13(10):1539-1548.                                                                                              |
| 62 | Solomon  | Solomon BJ, Kim D-W, Wu Y-L, et al. Final overall survival analysis from a study comparing first-line crizotinib versus chemotherapy in ALK-mutation-positive non-small-cell lung cancer. <i>Journal of Clinical Oncology</i> . 2018;36(22):2251-2258.                                                                                           |
| 63 | Solomon  | Solomon BJ, Mok T, Kim DW, et al. First-line crizotinib versus chemotherapy in ALK-positive lung cancer. <i>N Engl J Med</i> . 2014;371(23):2167-2177.                                                                                                                                                                                           |
| 64 | Shaw     | Shaw/ versus chemotherapy/ ALK-positive<br>Crizotinib                                                                                                                                                                                                                                                                                            |
| 65 | Shaw     | Shaw AT, Kim TM, Crino L, et al. Ceritinib versus chemotherapy in patients with ALK-rearranged non-small-cell lung cancer previously given chemotherapy and crizotinib (ASCEND-5): a randomised, controlled, open-label, phase 3 trial. <i>Lancet Oncol</i> . 2017;18(7):874-886.                                                                |
| 66 | Soria    | Soria JC, Tan DSW, Chiari R, et al. First-line ceritinib versus platinum-based chemotherapy in advanced ALK-rearranged non-small-cell lung cancer (ASCEND-4): a randomised, open-label, phase 3 study. <i>Lancet</i> . 2017;389(10072):917-929.                                                                                                  |
| 67 | Peters   | Peters S, Camidge DR, Shaw AT, et al. Alectinib versus Crizotinib in Untreated ALK-Positive Non-Small-Cell Lung Cancer. <i>N Engl J Med</i> . 2017;377(9):829-838.                                                                                                                                                                               |
| 68 | Hida     | Hida T, Nokihara H, Kondo M, et al. Alectinib versus crizotinib in patients with ALK-positive non-small-cell lung cancer (J-ALEX): an open-label, randomised phase 3 trial. <i>Lancet</i> . 2017;390(10089):29-39.                                                                                                                               |
| 69 | Camidge  | Camidge DR, Dziadziuszko R, Peters S, et al. Updated Efficacy and Safety Data and Impact of the EML4-ALK Fusion Variant on the Efficacy of Alectinib in Untreated ALK-Positive Advanced Non-Small Cell Lung Cancer in the Global Phase III ALEX Study. <i>J Thorac Oncol</i> . 2019;14(7):1233-1243.                                             |
| 70 | Camidge  | Camidge DR, Kim HR, Ahn MJ, et al. Brigatinib versus Crizotinib in ALK-Positive Non-Small-Cell Lung Cancer. <i>N Engl J Med</i> . 2018;379(21):2027-2039.                                                                                                                                                                                        |
| 71 | Bellmunt | Bellmunt J, De Wit R, Vaughn DJ, et al. Pembrolizumab as second-line therapy for advanced urothelial carcinoma. <i>New England Journal of Medicine</i> . 2017;376(11):1015-1026.                                                                                                                                                                 |
| 72 | Cohen    | Cohen EEW, Soulieres D, Le Tourneau C, et al. Pembrolizumab versus methotrexate, docetaxel, or cetuximab for recurrent or metastatic head-and-neck squamous cell carcinoma (KEYNOTE-040): a randomised, open-label, phase 3 study. <i>Lancet</i> . 2019;393(10167):156-167.                                                                      |
| 73 | Ferris   | Ferris RL, Blumenschein G, Jr., Fayette J, et al. Nivolumab for Recurrent Squamous-Cell Carcinoma of the Head and Neck. <i>N Engl J Med</i> . 2016;375(19):1856-1867.                                                                                                                                                                            |

|    |          |                                                                                                                                                                                                                                                                                                                                                      |
|----|----------|------------------------------------------------------------------------------------------------------------------------------------------------------------------------------------------------------------------------------------------------------------------------------------------------------------------------------------------------------|
| 74 | Escudier | Escudier B, Sharma P, McDermott DF, et al. CheckMate 025 Randomized Phase 3 Study: Outcomes by Key Baseline Factors and Prior Therapy for Nivolumab Versus Everolimus in Advanced Renal Cell Carcinoma. <i>Eur Urol.</i> 2017;72(6):962-971.                                                                                                         |
| 75 | Powles   | Powles T, Duran I, van der Heijden MS, et al. Atezolizumab versus chemotherapy in patients with platinum-treated locally advanced or metastatic urothelial carcinoma (IMvigor211): a multicentre, open-label, phase 3 randomised controlled trial. <i>Lancet.</i> 2018;391(10122):748-757.                                                           |
| 76 | Motzer   | Motzer RJ, Penkov K, Haanen J, et al. Avelumab plus Axitinib versus Sunitinib for Advanced Renal-Cell Carcinoma. <i>N Engl J Med.</i> 2019;380(12):1103-1115.                                                                                                                                                                                        |
| 77 | Zhu      | Zhu AX, Rosmorduc O, Evans T, et al. SEARCH: a phase III, randomized, double-blind, placebo-controlled trial of sorafenib plus erlotinib in patients with advanced hepatocellular carcinoma. <i>Journal of Clinical Oncology</i> , 2014, vol 33, num 6, p 559-566. 2014.                                                                             |
| 78 | Machiels | Machiels J-PH, Haddad RI, Fayette J, et al. Afatinib versus methotrexate as second-line treatment in patients with recurrent or metastatic squamous-cell carcinoma of the head and neck progressing on or after platinum-based therapy (LUX-Head & Neck 1): an open-label, randomised phase 3 trial. <i>The Lancet Oncology.</i> 2015;16(5):583-594. |
| 79 | Argiris  | Argiris A, Ghebremichael M, Gilbert J, et al. Phase III randomized, placebo-controlled trial of docetaxel with or without Gefitinib in recurrent or metastatic head and neck cancer: an eastern cooperative oncology group trial. <i>Journal of clinical oncology.</i> 2013;31(11):1405.                                                             |
| 80 | Zalcman  | Zalcman G, Mazieres J, Margery J, et al. Bevacizumab for newly diagnosed pleural mesothelioma in the Mesothelioma Avastin Cisplatin Pemetrexed Study (MAPS): a randomised, controlled, open-label, phase 3 trial. <i>Lancet.</i> 2016;387(10026):1405-1414.                                                                                          |
